# Supplementary material for: Development of a computable phenotype to identify a transgender sample for health research purposes: a feasibility study in a large linked provincial healthcare administrative cohort in British Columbia, Canada
Source: PubMed Central journal article supplement — BMJ Open. 2021 Mar 25;11(3):e040928. doi: 10.1136/bmjopen-2020-040928 (PMC7996659; doi:10.1136/bmjopen-2020-040928), 2021-03-25
Supplement: bmjopen-2020-040928.draft_revisions.pdf [file bmjopen-2020-040928.draft_revisions.pdf]

# BMJ Open

BMJ Open is committed to open peer review. As part of this commitment we make the peer review history of every article we publish publicly available.

When an article is published we post the peer reviewers' comments and the authors' responses online. We also post the versions of the paper that were used during peer review. These are the versions that the peer review comments apply to.

The versions of the paper that follow are the versions that were submitted during the peer review process. They are not the versions of record or the final published versions. They should not be cited or distributed as the published version of this manuscript.

BMJ Open is an open access journal and the full, final, typeset and author-corrected version of record of the manuscript is available on our site with no access controls, subscription charges or pay-per-view fees (<http://bmjopen.bmj.com>).

If you have any questions on BMJ Open's open peer review process please email [info.bmjopen@bmj.com](mailto:info.bmjopen@bmj.com)

# BMJ Open

## Development of a computable phenotype to identify a transgender sample for health research purposes: A feasibility study in a large linked provincial healthcare administrative cohort in British Columbia, Canada

|                               |                                                                                                                                                                                                                                                                                                                                                                                                                                                                                                                                                                                     |
|-------------------------------|-------------------------------------------------------------------------------------------------------------------------------------------------------------------------------------------------------------------------------------------------------------------------------------------------------------------------------------------------------------------------------------------------------------------------------------------------------------------------------------------------------------------------------------------------------------------------------------|
| Journal:                      | <i>BMJ Open</i>                                                                                                                                                                                                                                                                                                                                                                                                                                                                                                                                                                     |
| Manuscript ID                 | bmjopen-2020-040928                                                                                                                                                                                                                                                                                                                                                                                                                                                                                                                                                                 |
| Article Type:                 | Original research                                                                                                                                                                                                                                                                                                                                                                                                                                                                                                                                                                   |
| Date Submitted by the Author: | 26-May-2020                                                                                                                                                                                                                                                                                                                                                                                                                                                                                                                                                                         |
| Complete List of Authors:     | Rich, Ashleigh; The University of British Columbia, School of Population & Public Health; BC Centre for Excellence in HIV/AIDS, Poteat, Tonia; University of North Carolina at Chapel Hill, Department of Social Medicine<br>Koehoorn, Mieke; University of British Columbia, School of Population and Public Health;<br>Li, Jenny; BC Centre for Excellence in HIV/AIDS,<br>Ye, Monica; BC Centre for Excellence in HIV/AIDS,<br>Sereda, Paul; British Columbia Centre for Excellence in HIV/AIDS,<br>Salway, Travis; Simon Fraser University<br>Hogg, R; Simon Fraser University, |
| Keywords:                     | EPIDEMIOLOGY, PUBLIC HEALTH, Sexual and gender disorders < PSYCHIATRY, HIV & AIDS < INFECTIOUS DISEASES                                                                                                                                                                                                                                                                                                                                                                                                                                                                             |
|                               |                                                                                                                                                                                                                                                                                                                                                                                                                                                                                                                                                                                     |

SCHOLARONE™  
Manuscripts

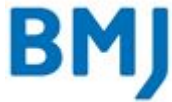

I, the Submitting Author has the right to grant and does grant on behalf of all authors of the Work (as defined in the below author licence), an exclusive licence and/or a non-exclusive licence for contributions from authors who are: i) UK Crown employees; ii) where BMJ has agreed a CC-BY licence shall apply, and/or iii) in accordance with the terms applicable for US Federal Government officers or employees acting as part of their official duties; on a worldwide, perpetual, irrevocable, royalty-free basis to BMJ Publishing Group Ltd ("BMJ") its licensees and where the relevant Journal is co-owned by BMJ to the co-owners of the Journal, to publish the Work in this journal and any other BMJ products and to exploit all rights, as set out in our [licence](#).

The Submitting Author accepts and understands that any supply made under these terms is made by BMJ to the Submitting Author unless you are acting as an employee on behalf of your employer or a postgraduate student of an affiliated institution which is paying any applicable article publishing charge ("APC") for Open Access articles. Where the Submitting Author wishes to make the Work available on an Open Access basis (and intends to pay the relevant APC), the terms of reuse of such Open Access shall be governed by a Creative Commons licence – details of these licences and which [Creative Commons](#) licence will apply to this Work are set out in our licence referred to above.

Other than as permitted in any relevant BMJ Author's Self Archiving Policies, I confirm this Work has not been accepted for publication elsewhere, is not being considered for publication elsewhere and does not duplicate material already published. I confirm all authors consent to publication of this Work and authorise the granting of this licence.

**TITLE PAGE**

**Title:** Development of a computable phenotype to identify a transgender sample for health research purposes: A feasibility study in a large linked provincial healthcare administrative cohort in British Columbia, Canada

**Authors:** Rich AJ<sup>1,2</sup>, Poteat T<sup>3</sup>, Koehoorn M<sup>1</sup>, Li J<sup>2</sup>, Ye M<sup>2</sup>, Sereda, P<sup>2</sup>, Salway T<sup>4</sup>, Hogg RS<sup>2,4</sup>

**Affiliations:**

1. School of Population and Public Health, University of British Columbia, Vancouver, Canada
2. British Columbia Centre for Excellence in HIV/AIDS, Vancouver, Canada
3. Department of Social Medicine, University of North Carolina- Chapel Hill, Chapel Hill, USA
4. Faculty of Health Sciences, Simon Fraser University, Burnaby, Canada

**Corresponding author:**

Ashleigh J Rich  
[ajrich@mail.ubc.ca](mailto:ajrich@mail.ubc.ca)

2206 East Mall  
Vancouver, BC  
V6T 1Z3  
Canada

**Word count:** 3842

## ABSTRACT

**Objectives:** Innovative methods are needed for identification of transgender people in administrative records for health research purposes. This study investigated the feasibility of using transgender-specific healthcare utilization in a Canadian population-based, health records database to develop a computable phenotype (CP) and identify the proportion of transgender people within the HIV-positive population as a public health priority.

**Design:** The COAST cohort comprises a data linkage between two provincial data sources: The BC Centre for Excellence in HIV/AIDS Drug Treatment Program, which coordinates HIV treatment dispensation across BC; and Population Data BC, a provincial data repository holding individual, longitudinal data for all BC residents (1996-2013).

**Setting:** British Columbia, Canada.

**Participants:** COAST participants include 13 907 BC residents living with HIV ( $\geq 19$  years of age) and a 10% random sample comparison group of the HIV-negative general population (514 952 individuals).

**Primary and secondary outcome measures:** Healthcare records were used to identify transgender people via a CP algorithm (diagnosis codes + androgen blocker/hormone prescriptions), to examine related diagnoses and prescription concordance, and to validate the CP using an independent provider-report transgender status measure. Demographics and chronic illness burden were also characterized for the transgender sample.

**Results:** The best-performing CP identified 137 HIV-negative and 51 HIV-positive transgender people (total 188). In validity analyses, the best-performing CP had low sensitivity (27.5%, 95%CI:17.8-39.8), high specificity (99.8%, 95%CI:99.6-99.8), low agreement using Kappa statistics (0.3, 95%CI:0.2-0.5), and moderate positive predictive value (43.2%, 95%CI:28.7-58.9). There was high concordance between exogenous-sex hormone use and transgender-specific diagnoses.

**Conclusions:** The development of a validated CP opens up new opportunities for identifying transgender people for inclusion in population-based health research using administrative health data, and offers the potential for much-needed and heretofore unavailable evidence on health status, including HIV status, and the healthcare use and needs of transgender people.

**KEYWORDS:** Transgender Persons, Health Services, Algorithms, Canada

## ARTICLE SUMMARY

### Strengths and limitations of this study:

- This study demonstrates the feasibility of developing and validating a computable phenotype for identification of a transgender sample, using a population-based representative source population and healthcare records.
- A major contribution of this study is the ascertainment of the population of transgender people living with HIV in the Canadian province of British Columbia, in a universal

1  
2  
3 healthcare setting, using a computable phenotype, and capacity to estimate the prevalence  
4 of transgender status among the population living with HIV in the province.

- 5 • Development of a validated transgender computable phenotype algorithm lays the  
6 foundation for future investigation of transgender-specific research questions related to  
7 general and HIV-specific healthcare use and health outcomes for this key population.  
8  
9

10  
11  
12  
13  
14  
15  
16  
17  
18  
19  
20  
21  
22  
23  
24  
25  
26  
27  
28  
29  
30  
31  
32  
33  
34  
35  
36  
37  
38  
39  
40  
41  
42  
43  
44  
45  
46  
47  
48  
49  
50  
51  
52  
53  
54  
55  
56  
57  
58  
59  
60

For peer review only

## INTRODUCTION

### Limited data on transgender people

Transgender people are often overlooked within epidemiological research and population health surveillance due to small sample size, limited research designs, and other institutional and methodological erasures.[1–3] A 2017 review of Medline-indexed literature from 1950 to 2016 found 2405 published articles including transgender people, with almost half published in the last decade.[4] A 2008 United States (US)-based meta-analysis of HIV prevalence among transgender populations found 24 studies of transgender women, and five additional studies of transgender men,[5] though an updated review found 43 primary studies on transgender women and 15 on transgender men published between 2006 to 2017.[6] Despite this recent increase in transgender health research in general and for HIV specifically, much of the literature has focused on transgender-specific care, mental health and HIV/sexual health,[7,8] leaving the population understudied, in particular in the broader areas of physical health and healthcare utilization.

The erasures or exclusions of transgender persons in health studies may be explained, in part, by methodological challenges. Specific to electronic health record (EHR) data, a 2017 report identified only one transgender person among 38,5820 cancer cases in a Minnesota cancer registry,[9] clearly an undercount given that 0.4% of the US general population and 0.6% (95% credibility intervals: 0.5%-0.7%) of the Minnesota population is estimated to be transgender.[10,11] This highlights the need for improved gender ascertainment and transgender inclusion in research relying on patient records and administrative data. The establishment of best practices for measuring transgender status in survey research, such as the two-step method (measuring sex assigned at birth and current gender identity), points to a way forward for transgender-inclusive population health research.[12,13] However, innovative research methods are needed to identify transgender people in studies that rely on existing data sources (in particular EHR) and that optimize the use of transgender respondents' data in non-transgender specific research.

### Methodological limitations in transgender health research

Previous research in transgender health largely comprises cross-sectional studies, case reports, and qualitative or observational research.[7] Much consists of clinic- or venue-based convenience samples or lack comparison groups.[7,8] The literature is further characterized by inconsistent transgender status measurement,[14] small sample sizes, and focus on the United States (US).[8] In response, researchers have called for advancing transgender health research methods - namely ascertainment of high-quality samples via systematic approaches - including for general population-based and health systems-based studies.[15]

### Computable phenotypes for transgender health research

One opportunity for the advancement of transgender health research methods is the emerging use of computable phenotypes (CPs), also called natural language processing algorithms[16] or case algorithms, to identify transgender samples in healthcare utilization data. A computable phenotype is a clinical feature, condition, or set of characteristics that can be determined directly from EHR and other ancillary health care data systems (e.g., disease registries, insurance claims data) data.[17] CPs are developed using a combination of data elements (e.g., sociodemographic variables, clinical diagnoses) and value sets (i.e., the selection of a set of relevant values for each

1  
2  
3 data element). Development of CPs using standardized methods and definitions enables  
4 identification and inclusion of transgender persons in research, as well as replication of analyses  
5 across data sources, healthcare organizations/sites and studies. CPs have application in clinical  
6 care, surveillance, and health research.  
7

8  
9 Recently, CP and other EHR-based algorithm methods have been applied in a number of settings  
10 primarily in the US to identify transgender samples for health research.[14] Specifically, the  
11 STRONG study identified a transgender cohort (n = 6,456) using EHR data from Kaiser  
12 Permanente health plan members in California and Georgia, for investigation of general and  
13 transgender-specific health outcomes.[18] Blosnich et al identified 3,177 people with a “gender  
14 identity disorder” diagnosis among military veterans accessing care through the US Veterans  
15 Health Administration healthcare system,[19] for examination of mental health and other  
16 outcomes. Researchers with the US Centers for Medicare & Medicaid Services identified 4,098  
17 transgender beneficiaries using national Medicare claims data,[20] and researchers at Vanderbilt  
18 University identified 234 transgender patients in their university clinic EHR data.[16] While  
19 these cohorts represent important opportunities for advancement of transgender health research,  
20 these methods have yet to be applied widely outside the US context. This is particularly  
21 important as different jurisdictions may vary in medical billing and coding practices, healthcare  
22 system patient populations, and representativeness of the general population. Specifically, in  
23 Canada, healthcare is delivered through a provincially administered universal healthcare system.  
24 As such, research using EHR provides an opportunity to develop methods for population-based,  
25 representative estimates of transgender populations within the Canadian context. Coupled with  
26 the current absence of gender ascertainment measures in population-based routinely collected  
27 data (e.g., census, national government health surveys, etc.) in Canada and many other  
28 jurisdictions, this remains an evidence need.  
29  
30  
31  
32

### 33 **Summary of study rationale**

34 This study investigated the application of emerging transgender health research methods,  
35 specifically CPs, in a Canadian context for the first time, testing the feasibility of identification  
36 of a transgender sample using EHR data from a provincial healthcare administrative data-linked  
37 cohort.  
38

## 39 **METHODS**

### 40 **Data Sources and Participants**

41 The Comparative Outcomes and Service Utilization Trends Study (COAST)  
42 COAST is a population-based cohort study focused on health services utilization research  
43 questions among all people known to be living with HIV (PLWH) in the province of British  
44 Columbia (BC) and a 10% random sample comparison group of the HIV-negative general  
45 population.[21] The COAST cohort comprises individual-level, longitudinal data from PLWH  
46 who have ever accessed HIV treatment in BC between 1996 and 2013, provided by Population  
47 Data BC (PopDataBC)[21] via data linkage between two provincial data sources, by personal  
48 health number: the Drug Treatment Program (DTP) [22] and the Ministry of Health. PopDataBC  
49 provides infrastructure for access to, and linkage of, longitudinal and individual-level  
50 administrative health data for all BC residents.[23]. The HIV-negative general population cohort  
51 was drawn randomly from the Ministry of Health registry data by PopDataBC. The COAST study  
52 has received approval from the University of British Columbia/Providence Health Care  
53  
54  
55  
56  
57  
58  
59



1  
2  
3 Research Ethics Board (#H09-02905) and Simon Fraser University Office of Research Ethics  
4 (#2013 s0566). The study complies with the BC Freedom of Information and Protection of  
5 Privacy Act (FIPPA) and did not require informed consent as it is conducted using  
6 retrospective administrative and anonymized data for research and statistical purposes  
7 only.  
8  
9

#### 10 Drug Treatment Program

11 In BC, antiretroviral therapy (ART) is provided to PLWH at no cost to the patient, and distributed  
12 through the DTP.[22] The DTP contributed a provider-reported measure of transgender status for  
13 COAST.  
14  
15

#### 16 Ministry of Health

17 Ministry of Health data available via COAST included insured medical service billing records for  
18 outpatient visits,[24,25] hospital (in-patient) visits,[26] prescription medications,[27,28] and vital  
19 statistics.[29]  
20  
21

### 22 **Measures & Analyses**

#### 23 Transgender computable phenotypes

24 Identification of transgender cases was tested in COAST using International Classification of  
25 Disease (ICD) codes (9<sup>th</sup> and 10<sup>th</sup> editions) and exogenous sex hormone prescription use.  
26 Transgender-specific diagnoses in medical and hospital billing records included the ICD-9 codes  
27 302.5 Trans-sexualism with unspecified history, 302.51 Trans-sexualism with asexual history,  
28 302.52 Trans-sexualism with homosexual history, 302.53 Trans-sexualism with heterosexual  
29 history, 302.6 Gender Identity Disorder in children, 302.85 Gender Identity Disorder in  
30 adolescents or adults; and ICD-10 codes F64.0 Gender Identity Disorder of childhood, F64.2  
31 Gender Identity Disorder of childhood, F64.8 Other Gender Identity Disorder, and F64.9 Gender  
32 Identity Disorder unspecified. The full list of androgen blockers and exogenous sex hormone  
33 prescriptions included in analyses is available in the supplementary material.  
34  
35  
36

#### 37 Concordance

38 To assess face validity and utility of diagnosis and prescription data over time in CP  
39 development, concordance analyses evaluated the presence of at least one included diagnosis and  
40 prescription during the COAST study follow-up period with the presence of at least one included  
41 diagnosis and prescription in the last study year. Concordance was assessed between  
42 transgender-specific diagnoses, exogenous sex hormone and androgen blocker prescriptions, and  
43 non-transgender specific diagnoses (ICD-9 259.9 Unspecified Endocrine Disorder and ICD-10  
44 E34.9 Endocrine Disorder, Unspecified (see supplementary material)). Endocrine disorder  
45 diagnosis codes are sometimes preferred by medical providers treating transgender people in  
46 response to historic exclusions of transgender-specific care from insurance coverage and to  
47 combat the stigma of transgender-specific diagnosis codes that have historically been classified  
48 as psychiatric disorders in the Diagnostic and Statistical Manual of Mental Disorders (DSM).[30]  
49 Exogenous sex hormone use, while common in transgender populations,[5,31] is not  
50 transgender-specific. Cisgender populations also use androgen blocker and sex hormone  
51 prescriptions (e.g. estrogen to treat menopausal symptoms in cisgender women, spironolactone is  
52 used for hypertension), thus exogenous sex hormone and androgen blocker prescription use  
53  
54  
55  
56  
57  
58  
59

cannot independently identify transgender people. At the same time, not all transgender people use hormones and some access via non-medical sources.[32,33]

### Validation

In British Columbia, transgender status is collected in the DTP via a provider-reported sex variable (“Male”, “Male to Female”, “Female to Male”, or “Female”). Patients reported as either “Male to Female” or “Female to Male” were classified as transgender. The provider-reported transgender measure, available for the HIV positive cohort only, was used as a ‘gold standard’ for CP validation. Sensitivity, specificity, positive predictive value and kappa statistics with corresponding 95% confidence intervals (CI) were calculated for identifying transgender people via the CPs.

### Demographics and chronic conditions

To further assess face validity of the transgender CP for future health research, descriptive statistics were calculated for the transgender sample using the COAST study key sociodemographic and health variables, specifically laboratory confirmed HIV serostatus (HIV-positive/HIV-negative), baseline age, patient’s Health Authority (five provincial regions for the administration of health services that include large urban centres, suburban regions, and rural/remote areas), and chronic illness burden based on standardized case definitions from the BC Ministry of Health [34] and the BC Cancer Agency.[35]

## RESULTS

The total COAST cohort included 528 859 people, of which 514 952 were HIV-negative (10% general population random sample) and 13 907 were PLWH (Figure 1).

*[Figure 1 here]*

### Concordance

Of the 237 people who had ever had a transgender-specific diagnosis during the study period, 19.4% also had a recent diagnosis in the last follow-up year (Table 2). None had an unspecified endocrine disorder diagnosis at any time, thus this diagnosis was excluded from all CPs. Of the 237, 79.3% had an exogenous sex hormone or androgen blocker prescription at least once during the study period and 46.4% had one in the last year.

**Table 1. Concordance analyses for diagnoses and hormone measures**

|                                            | N   | %    |
|--------------------------------------------|-----|------|
| ≥ Transgender ICD- ever                    | 237 | 100  |
| ≥ Transgender ICD- recent                  | 46  | 19.4 |
| Unspecified Endocrine Disorder use- ever   | 0   | 0.0  |
| Unspecified Endocrine Disorder use- recent | 0   | 0.0  |
| ≥ Hormone/blocker use- ever                | 188 | 79.3 |
| ≥ Hormone/blocker use-recent               | 110 | 46.4 |

### Validation

While no one CP consistently performed well across all validation metrics, the CP with the best overall performance across test statistics was based on having received at least one transgender-

specific diagnosis and at least one androgen blocker/exogenous sex hormone prescription over the study follow-up period (Table 1). This CP had high specificity (99.8%, 95% CI: 99.6-99.8), low sensitivity (27.5%, 95% CI: 17.8-39.8), low to moderate Kappa coefficients (0.3, 95% CI: 0.2-0.5) and moderate positive predictive values (43.2%, 95% CI: 28.7-58.9).

**Table 2. Validation measures of transgender computable phenotype (CP) with provider-report transgender status measures, in COAST HIV-positive cohort**

| CP                                                      | Sensitivity (95% CI) | Specificity (95% CI) | PPV (95% CI)      | Kappa (95% CI) |
|---------------------------------------------------------|----------------------|----------------------|-------------------|----------------|
| ≥ 1 transgender ICD- ever                               | 27.5 (17.8, 39.8)    | 99.7 (99.6, 99.8)    | 40.4 (26.7, 55.7) | 0.3 (0.2, 0.4) |
| ≥ 1 transgender ICD- recent                             | 8.7 (3.6, 18.6)      | 100.0 (99.9, 100.0)  | 85.7 (42.0, 99.4) | 0.2 (0.1, 0.3) |
| ≥ 1 transgender ICD AND ≥ 1 hormone/blocker use- ever   | 27.5 (17.8, 39.8)    | 99.8 (99.6, 99.8)    | 43.2 (28.7, 58.9) | 0.3 (0.2, 0.5) |
| ≥ 1 transgender ICD AND ≥ 1 hormone/blocker use- recent | 7.3 (2.7, 16.8)      | 100.0 (99.9, 100.0)  | 83.3 (36.5, 99.1) | 0.1 (0.0, 0.2) |

### Transgender phenotype

Applying the best-performing CP, 137 HIV-negative people and 51 HIV-positive people (188 total) were identified as transgender in the respective COAST cohorts (Figure 1).

### Demographics and chronic conditions

Demographic characteristics and chronic conditions for the 188 transgender people identified via the best-performing CP are presented in Figures 2 to 4. Transgender people were geographically located throughout BC health regions. The Vancouver Coastal Health Authority region, which includes the largest municipal area in BC, had the highest concentration of transgender people (44.2%) while the Northern Health Authority region - a predominantly rural and remote area of the province - had the lowest (1.6%).<sup>[36]</sup> The HIV-positive group had a higher median age than the HIV-negative group (35 [Q1, Q3: 30,42] and 30 [Q1, Q3: 19,42], respectively). For the HIV-negative sample, the largest proportion of transgender people were aged 19 to 29 years (44.5%) and the smallest proportion aged 55 years and older (<3%). For the HIV-positive sample, the largest proportion were aged 30 to 34 years (25.5%) and the smallest proportion aged 55 years and older (<2%).

*[Figures 2 and 3 here]*

Overall, HIV-positive transgender people had a higher prevalence of at least one chronic condition (other than HIV) compared to HIV-negative transgender people (88.2% versus 85.4%, respectively), and of two or more chronic conditions (76.5% versus 52.6%, respectively). Specific chronic disease differences between transgender people living with and without HIV were most notable for a higher prevalence among the HIV-positive cohort of cardiovascular

1  
2  
3 disease, chronic kidney disease, osteoarthritis, schizophrenia and personality disorders, and  
4 chronic liver disease, but a lower prevalence for hypertension.  
5

6  
7 *[Figure 4 here]*  
8

## 9 **DISCUSSION**

10 This study demonstrates the feasibility of identification of a sample of transgender people in a  
11 large linked provincial healthcare administrative database, using a CP based on prescriptions and  
12 diagnoses. Among a growing number of studies using EHR and CP methods to identify  
13 transgender samples for health research purposes, this is the first to do so in Canada., to  
14 independently validate the CP using a ‘gold standard’ of provider-reported transgender status,  
15 and the only to use population-based data.  
16

### 17 **Concordance**

18 There was high concordance between transgender-specific diagnoses and exogenous sex  
19 hormone or androgen blocker prescription use in this study. That nearly half of those with at  
20 least one transgender-specific diagnosis had been dispensed hormones or blockers in the past  
21 year is consistent with findings from US and Canadian studies (48.9% and 43.0%,  
22 respectively)[20,32,33] - suggesting face validity for the current CP.  
23  
24  
25

### 26 **CP development and validation**

27 The best-performing CP overall successfully identified cisgender people who were truly  
28 cisgender (specificity) and correctly identified transgender people who were truly transgender  
29 (0.2% false positive rate, results not shown). However, the selected CP had relatively low  
30 sensitivity, missing approximately 72.5% of ‘true’ transgender people in COAST. Though a  
31 relatively small proportion of the ‘true’ transgender sample was identified in this study, the  
32 impact on future analyses comparing health outcomes for transgender and cisgender groups is  
33 likely negligible, as even the large proportion of ‘true’ transgender people misclassified as  
34 cisgender (approximate n=496) is a very small proportion of the total COAST sample. At worst,  
35 this misclassification would bias results related to disparities between transgender and cisgender  
36 health toward the null, producing a conservative attenuated effect. Further, as discussed below,  
37 gender identity classification will likely greatly improve as transgender care shifts further into  
38 the fee-for-service system in BC. As in other Canadian administrative data studies, low  
39 sensitivity may be explained in part by provider and system billing preferences using 3-digit ICD  
40 diagnosis coding instead of the more specific 4-digit coding, and inconsistencies in the BC  
41 billing management system.[37]  
42  
43  
44

45 The limited agreement between the CP and provider-report transgender status may be due to the  
46 widely varying transgender status prevalence depending on study design and ascertainment  
47 measures used.[14] In the BC context, the CP and the DTP measures are assessing transgender  
48 status in different ways and for different purposes. In the DTP, transgender status is ascertained  
49 in the context of HIV diagnosis and ART prescribing, during which demographics and HIV  
50 transmission risk factors are recorded. This differs from recording diagnoses in EHR for those  
51 accessing transgender-specific care as utilized in the CP. Ultimately, a single CP may not be  
52 sufficient for all intended purposes and the best applicable CP (using different types of  
53  
54  
55  
56  
57  
58  
59  
60

1  
2  
3 diagnoses, prescriptions or procedures) may differ depending on the intended healthcare, health  
4 research, or health policy application.[17]  
5

6  
7 There is limited literature on EHR-based studies with the ability to validate an administrative  
8 transgender measure using a ‘gold standard’ comparison measure.[16] The two previous studies  
9 that have developed and validated algorithms to identify transgender individuals have both been  
10 conducted in non-representative samples in the US, one using Medicare data[38] and one in a  
11 university medical center.[16] Similar to the current study, the Medicare study found high  
12 specificity when comparing an EHR-based and a two-step survey-based transgender measure.  
13 However, the Medicare study found that the EHR measure performed consistently well with high  
14 sensitivity and a high Kappa statistic, unlike in the current study. Using chart review as the ‘gold  
15 standard’ for comparison of transgender status, Ehrenfeld et al. found a low false positive rate for  
16 their best-performing algorithm (3%), though not as low as the false positive rate in the current  
17 study. The overall high levels of agreement for transgender measures in the two previous studies  
18 is likely a function of the lack of independence between the ‘gold standard’ and the CP or  
19 algorithm measures. Specifically, only those classified as transgender in the Medicare EHR data  
20 were offered survey participation to complete the two-step ‘gold standard’ survey measure, and  
21 only those cases identified as transgender in the university clinic EHR were included in chart  
22 review. Thus, previous studies could assess agreement between the two measures, but not  
23 robustly validate either. In the current study, the DTP provider-based transgender status measure  
24 is independent and thus could be used for robust CP validation.  
25  
26  
27

### 28 **Transgender status prevalence & ascertainment**

29  
30 Based on a recent meta-analysis of transgender status prevalence in population-based probability  
31 samples,[10] it was expected that an effective CP would identify 0.4% of the general population  
32 as transgender, or approximately 54 of the HIV-positive COAST cohort (n=13 907) and 3,098 of  
33 the HIV-negative cohort (n=516 340). Consistent with expectations, the best-performing CP  
34 identified 51 PLWH as transgender, equivalent to a transgender status prevalence of 0.4% among  
35 PLWH. Contrary to expectations, the best-performing CP identified less than 5% of the number  
36 of transgender persons expected in the HIV-negative cohort. This is likely a result of a number of  
37 factors including the limitation of CPs to the subset of a population accessing care as noted, and  
38 the result of most transgender people in BC receiving care currently outside the main fee-for-  
39 service healthcare delivery system. However, it is also consistent with the undercount of  
40 transgender populations using diagnostic criteria compared to other methods of ascertainment  
41 demonstrated in other studies.[14]  
42  
43

44  
45 Using the broadest CP algorithm (any transgender-specific diagnosis ever, n=56) and those  
46 identified by provider-report together (total n=106), the total transgender PLWH sample would  
47 represent as high as 0.88% (range: 0.73-1.1%) of the prevalent HIV infections in BC in  
48 2014.[39] This overrepresentation of transgender people among PLWH is consistent with  
49 evidence of a disproportionate HIV burden for transgender populations globally,[5,40,41] as well  
50 as in line with the only other available data on the proportion of PLWH who are transgender,  
51 from US national surveillance data (2012 data: 1.1%, 95%CI: 0.8-1.4).[42]  
52  
53

### 54 **Demographics and chronic conditions**

55  
56  
57  
58  
59  
60

1  
2  
3  
4  
5  
6  
7  
8  
9  
10  
11  
12  
13  
14  
15  
16  
17  
18  
19  
20  
21  
22  
23  
24  
25  
26  
27  
28  
29  
30  
31  
32  
33  
34  
35  
36  
37  
38  
39  
40  
41  
42  
43  
44  
45  
46  
47  
48  
49  
50  
51  
52  
53  
54  
55  
56  
57  
58  
59  
60

Despite moderate to low performance by some validation metrics, particularly low sensitivity, the CP was able to detect meaningful results in the characterization of demographics and chronic condition burden for the transgender sample - supporting CP face validity. The population density and age distribution by HIV-status of transgender people in this study is largely consistent with general population patterns, as well as the larger COAST cohort.[21,36] The overall higher burden of chronic illness for transgender people living with HIV versus without HIV in this study is consistent with elevated chronic illness risk and morbidity among non-transgender PLWH.[43] This higher chronic disease burden is linked to HIV disease processes and related inflammatory immune response.[44] While a small but growing number of studies have begun to investigate the chronic illness burden for transgender populations in other industrialized settings,[16,19,45–47] including using EHR data, findings vary widely due to differences in sampling, study design, setting and measurement.

### Limitations

Findings from this study should be interpreted in the context of a few key limitations. CPs are by design only applicable to people accessing healthcare services, often motivated by illness and aided by the ability to access care. As such, this study is limited to those transgender people accessing medical transition care in BC and may only represent 24% to 47% of the total transgender population.[33] This study was also limited by the inability to validate the transgender CP among the HIV-negative COAST cohort, as a ‘gold standard’ provider-based transgender measure was only available for the HIV-positive cohort. It is possible that the transgender CPs would perform differently in populations living without HIV, particularly as healthcare contact is higher among populations living with HIV. Additionally, this study should be considered in light of the context in which it was conducted, an environment in which transgender healthcare delivery in BC is currently shifting from specialized care settings to the main primary care fee-for-service settings. Given that COAST only includes fee-for-service data, this study was limited by the inability to capture transgender people who access transgender care outside the fee-for-service system. However, fortunately, as the shift to the fee-for-service system occurs, transgender ascertainment via CPs in BC will likely improve. The administrative data used in this study may also be susceptible to coding error (and coding biases/practices) across conditions and settings,[48] potentially introducing misclassification bias in terms of transgender ascertainment. Finally, chronic condition prevalence data reported in this study should be interpreted with caution, given potential selection bias by serostatus in the COAST cohort; though any such bias likely resulted in conservative estimates of difference by serostatus in this analysis.

### CONCLUSION

This study makes a number of important contributions to the literature on innovative methods in transgender health. Major contributions include development and validation of a transgender CP, using a population-based representative source population, in the Canadian context. Another strength is the approximately complete ascertainment of the population of transgender PLWH in BC, and capacity to estimate transgender status prevalence among PLWH. In a current funding environment of limited support for longitudinal transgender health studies in the US and none to date in Canada, this study and the methods employed offer an efficient, replicable and cost-effective way forward in creating electronic cohorts for advancing transgender health research.[15] Moreover, the recent rollback of sexual orientation and gender identity data

1  
2  
3 collection and legal changes in insurance coverage of transgender healthcare in the US potentiate  
4 decline in accurate claims coding for gender-affirming care.[30] This highlights the utility of  
5 work in this area from other jurisdictions, particularly those with transgender-inclusive universal  
6 healthcare systems such as Canada.  
7

8  
9 Future research should build upon the methods developed in this study and explore  
10 complimentary approaches for gender identity ascertainment in administrative and EHR data,  
11 such as machine learning approaches, as have been used to develop algorithms based on  
12 healthcare utilization data in other research areas. Finally, the current study lays the foundation  
13 for future work with the ability to study transgender health and healthcare use patterns over time,  
14 with linkage to laboratory data, as well as inclusion of appropriate comparison groups.[15,49]  
15

### 16 17 **ACKNOWLEDGEMENTS & DISCLAIMER**

18 The authors thank the COAST study participants, the BC Centre for Excellence in HIV/AIDS,  
19 the BC Ministry of Health, BC Vital Statistics Agency, PharmaNet and the institutional data  
20 stewards for granting access to the data, and Population Data BC for facilitating the data linkage  
21 process. In addition, we would like to thank the COAST core team members and other support  
22 staff at these institutions for their administrative assistance with the data access and preparation.  
23 All inferences, opinions, and conclusions drawn in this paper are those of the authors, and do not  
24 reflect the opinions or policies of the Data Steward(s). There are no conflicts of interest to  
25 declare.  
26  
27

### 28 29 **COMPETING INTERESTS**

30 None declared.  
31

### 32 33 **FUNDING**

34 This work was supported by the Canadian Institutes of Health Research, through an Operation  
35 Grant [grant number 130419], a Foundation Award to RSH [grant number 143342], and a  
36 Doctoral Research Award to AJR [grant number 152382] and support from the British Columbia  
37 Centre for Excellence in HIV/AIDS. The DTP receives funding from the provincial government  
38 of British Columbia (PharmaCare). The funders had no role in the study design, analysis,  
39 interpretation of the data, drafting of the manuscript or in the decision to submit for  
40 publication.  
41  
42

### 43 44 **CONTRIBUTORS**

45 AJR and RSH conceived of and designed the study. RSH acquired study data and funding. JL, MY  
46 and PS conducted data analysis, in consultation with AJR. AJR drafted the manuscript, with  
47 commentary on drafts by TP, MK, and TS, and approval of final version by all co-authors.  
48

### 49 50 **PATIENT CONSENT FOR PUBLICATION**

51 Not required.  
52

### 53 54 **DATA SHARING STATEMENT** 55 56 57 58 59 60

1  
2  
3 The data used for this study are held by the BC Centre for Excellence in HIV/AIDS under  
4 the authority of the BC Ministry of Health; as they contain confidential patient health  
5 records including HIV serostatus, data are cannot be made available to other parties.  
6  
7  
8  
9  
10  
11  
12  
13  
14  
15  
16  
17  
18  
19  
20  
21  
22  
23  
24  
25  
26  
27  
28  
29  
30  
31  
32  
33  
34  
35  
36  
37  
38  
39  
40  
41  
42  
43  
44  
45  
46  
47  
48  
49  
50  
51  
52  
53  
54  
55  
56  
57  
58  
59  
60

For peer review only



1  
2  
3 **FIGURES LEGENDS**  
4

5 **Figure 1. Total transgender sample identified using a computable phenotype with**  
6 **electronic health records**  
7

8  
9 **Figure 2. Geographic distribution of transgender people across province, by health**  
10 **authority\***  
11

12 *\*% of transgender individuals with known health authority (n=182)*  
13  
14

15 **Figure 3. Age distribution of transgender sample, by HIV serostatus**  
16  
17

18 **Figure 4. Co-morbidities among transgender sample, by HIV serostatus**  
19  
20  
21  
22  
23  
24  
25  
26  
27  
28  
29  
30  
31  
32  
33  
34  
35  
36  
37  
38  
39  
40  
41  
42  
43  
44  
45  
46  
47  
48  
49  
50  
51  
52  
53  
54  
55  
56  
57  
58  
59  
60

## REFERENCES

1. Bauer GR. Making sure everyone counts: Considerations for inclusion, identification, and analysis of transgender and transsexual participants in health surveys. *What A Difference Sex And Gender Make, Gender Sex Health Research Casebook*. Vancouver, Canada: Canadian Institutes of Health Research (CIHR), Institute for Gender and Health (IGH); 2012. p. 59–67.
2. Bauer GR, Hammond R, Travers R, Kaay M, Hohenadel KM, Boyce M. “I don’t think this is theoretical; this is our lives”: How erasure impacts health care for transgender people. *JANAC*. 2009;20:348–361.
3. Poteat T, German D, Flynn C. The conflation of gender and sex: Gaps and opportunities in HIV data among transgender women and MSM. *Glob Public Health*. 2016;11:835–848.
4. Wanta JW, Unger CA. Review of the transgender literature: Where do we go from here? *Transgender Health*. 2017;2:119–128.
5. Herbst JH, Jacobs ED, Finlayson TJ, McKleroy VS, Neumann MS, Crepaz N, et al. Estimating HIV prevalence and risk behaviors of transgender persons in the United States: a systematic review. *AIDS Behav*. 2008;12:1–17.
6. Becasen JS, Denard CL, Mullins MM, Higa DH, Sipe TA. Estimating the prevalence of HIV and sexual behaviors among the US transgender population: A systematic review and meta-analysis, 2006–2017. *Am J Public Health*. 2019;109:e1–8.
7. Marshall Z, Welch V, Thomas J, Brunger F, Swab M, Shemilt I, et al. Documenting research with transgender and gender diverse people: protocol for an evidence map and thematic analysis. *Syst Rev*. 2017;6:35.
8. Reisner SL, Poteat T, Keatley J, Cabral M, Mothopeng T, Dunham E, et al. Global health burden and needs of transgender populations: a review. *The Lancet*. 2016;388:412–436.
9. Cathcart-Rake EJ, Lightner DJ, Quevedo FJ, Ertz DC, Jatoi A. Cancer in transgender patients: One case in 385,820 is indicative of a paucity of data. *J Oncol Pract*. 2017;JOP2017027714.
10. Meerwijk EL, Sevelius JM. Transgender population size in the United States: A meta-regression of population-based probability samples. *Am J Public Health*. 2017;107:e1–e8.
11. Flores AR, Herman JL, Gates GJ, Brown TNT. How Many Adults Identify as Transgender in the United States? [Internet]. Los Angeles, CA: Williams Institute; 2016 Jun p. 13. Available from: <https://williamsinstitute.law.ucla.edu/wp-content/uploads/How-Many-Adults-Identify-as-Transgender-in-the-United-States.pdf>
12. The GenIUSS Group. Best Practices for Asking Questions to Identify Transgender and Other Gender Minority Respondents on Population-Based Surveys. Los Angeles, CA: The Williams Institute; 2014.

13. Bauer GR, Braimoh J, Scheim AI, Dharma C. Transgender-inclusive measures of sex/gender for population surveys: Mixed-methods evaluation and recommendations. *PLOS ONE*. 2017;12:e0178043.
14. Collin L, Reisner SL, Tangpricha V, Goodman M. Prevalence of transgender depends on the “case” definition: A systematic review. *J Sex Med*. 2016;13:613–626.
15. Reisner SL, Deutsch MB, Bhasin S, Bockting W, Brown GR, Feldman J, et al. Advancing methods for US transgender health research. *Curr Opin Endocrinol Diabetes Obes*. 2016;23:198–207.
16. Ehrenfeld JM, Gottlieb KG, Beach LB, Monahan SE, Fabbri D. Development of a Natural Language Processing Algorithm to Identify and Evaluate Transgender Patients in Electronic Health Record System. *Ethn Dis*. 2019;29:441–50.
17. Richesson R, Smerek M, Rusincovitch S, Zozus MN, Chaudhuri PS, Hammond WE, et al. Electronic Health Records-Based Phenotyping. In: Uhlenbrauck G, editor. *NIH Collab Living Textbook Pragmatic Clin Trials*. Bethesda, Maryland; 2014.
18. Quinn VP, Nash R, Hunkeler E, Contreras R, Cromwell L, Becerra-Culqui TA, et al. Cohort profile: Study of Transition, Outcomes and Gender (STRONG) to assess health status of transgender people. *BMJ Open*. 2017;7:e018121.
19. Blosnich JR, Brown GR, Shipherd Phd JC, Kauth M, Piegari RI, Bossarte RM. Prevalence of gender identity disorder and suicide risk among transgender veterans utilizing veterans health administration care. *Am J Public Health*. 2013;103:e27–32.
20. Proctor K, Haffer SC, Ewald E, Hodge C, James CV. Identifying the transgender population in the Medicare program. *Transgender Health*. 2016;1:250–265.
21. Eyawo O, Hull MW, Salters K, Samji H, Cescon A, Sereda P, et al. Cohort profile: the Comparative Outcomes And Service Utilization Trends (COAST) Study among people living with and without HIV in British Columbia, Canada. *BMJ Open*. 2018;8:e019115.
22. Drug Treatment Program. BC Centre for Excellence. *HIVAIDS*. 2010 [cited 2019 Sep 27]. Available from: <http://www.cfenet.ubc.ca/drug-treatment-program>
23. Population Data BC. About PopData [Internet]. Population Data BC. 2017 [cited 2019 Sep 27]. Available from: <https://www.popdata.bc.ca/aboutus>
24. British Columbia Ministry of Health (2014). Medical Services Plan (MSP) Payment Information File. Population Data BC. Data Extract. MOH (2014). <http://www.popdata.bc.ca/data>
25. British Columbia Ministry of Health (2014). Consolidation File (MSP Registration & Premium Billing). Population Data BC. Data Extract. MOH (2014). <http://www.popdata.bc.ca/data>

- 1  
2  
3 26. Canadian Institute for Health Information (2014). Discharge Abstract Database (Hospital  
4 Separations). Population Data BC. Data Extract. MOH (2014). <http://www.popdata.bc.ca/data>  
5
- 6  
7 27. British Columbia Ministry of Health (2014). PharmaCare. Population Data BC. Data Extract.  
8 MOH (2014). <http://www.popdata.bc.ca/data>  
9
- 10 28. British Columbia Ministry of Health (2014). PharmaNet. Population Data BC. Data Extract.  
11 Data Stewardship Committee (2014). <http://www.popdata.bc.ca/data>  
12
- 13 29. British Columbia Vital Statistics Agency (2014). Vital Statistics Deaths. Population Data BC.  
14 Data Extract. Vital Statistics Agency (2014). <http://www.popdata.bc.ca>  
15
- 16 30. Arnold JD, Nelson AE, Loubier EM. Trends in Insurance Coverage for Gender-Affirming  
17 Surgeries. *JAMA Surg.* 2018;153:972.  
18
- 19 31. Radix A, Sevelius J, Deutsch MB. Transgender women, hormonal therapy and HIV  
20 treatment: a comprehensive review of the literature and recommendations for best practices. *J Int*  
21 *AIDS Soc.* 2016;19:20810.  
22
- 23 32. Rotondi NK, Bauer GR, Scanlon K, Kaay M, Travers R, Travers A. Nonprescribed hormone  
24 use and self-performed surgeries: “do-it-yourself” transitions in transgender communities in  
25 Ontario, Canada. *Am J Public Health.* 2013;103:1830–1836.  
26
- 27 33. Scheim AI, Bauer GR. Sex and gender diversity among transgender persons in Ontario,  
28 Canada: results from a respondent-driven sampling survey. *J Sex Res.* 2015;52:1–14.  
29
- 30 34. Chronic Disease Information Working Group. BC Chronic Disease and Selected Procedure  
31 Case Definitions [Internet]. British Columbia, Canada: BC Ministry of Health; 2019 Apr p. 1–  
32 132. Available from: [https://www2.gov.bc.ca/assets/gov/health/conducting-health-research/data-  
33 access/chronic-disease-registries-case-definitions.pdf](https://www2.gov.bc.ca/assets/gov/health/conducting-health-research/data-access/chronic-disease-registries-case-definitions.pdf)  
34  
35
- 36 35. British Columbia Cancer Agency (2014). BC Cancer Registry Data. Population Data BC. BC  
37 Cancer (2014). <http://www.popdata.bc.ca/data>  
38
- 39 36. BC Stats. Sub-provincial Population Estimates [Internet]. 2018 [cited 2019 Feb 1]. Available  
40 from: <file://localhost/Users/AJRich/Zotero/storage/5VM2LBUN/PopulationEstimates.html>  
41
- 42 37. Hu W. Diagnostic Codes in MSP Claim Data. Program Monitoring and Information  
43 Management Branch, Resource Management Division, Medical Services Plan; 1996 p. 39.  
44
- 45 38. Gerth J, Becerra-Culqui T, Bradlyn A, Getahun D, Hunkeler EM, Lash TL, et al. Agreement  
46 between medical records and self-reports: Implications for transgender health research. *Rev*  
47 *Endocr Metab Disord.* 2018;19:263–269.  
48
- 49 39. BC Centre for Disease Control. HIV in British Columbia: Annual Surveillance Report 2015.  
50 Vancouver, Canada: BC Centre for Disease Control; 2017.  
51  
52  
53  
54  
55  
56  
57  
58  
59

- 1  
2  
3 40. Poteat T, Scheim A, Xavier J, Reisner S, Baral S. Global epidemiology of HIV infection and  
4 related syndemics affecting transgender people. *J Acquir Immune Defic Syndr*. 2016;72 Suppl  
5 3:S210–9.  
6  
7  
8 41. Baral SD, Poteat T, Strömdahl S, Wirtz AL, Guadamuz TE, Beyrer C. Worldwide burden of  
9 HIV in transgender women: a systematic review and meta-analysis. *Lancet Infect Dis*.  
10 2013;13:214–222.  
11  
12 42. Centers for Disease Control and Prevention. Behavioral and Clinical Characteristics of  
13 Persons Receiving Medical Care for HIV Infection—Medical Monitoring Project, United States,  
14 2012 [Internet]. Washington, D.C.: Centers for Disease Control; 2015 Aug p. 42. Report No.: 12.  
15 Available from: [https://www.cdc.gov/hiv/pdf/library/reports/surveillance/cdc-hiv-](https://www.cdc.gov/hiv/pdf/library/reports/surveillance/cdc-hiv-HSSR_MMP_2012.pdf)  
16 [HSSR\\_MMP\\_2012.pdf](https://www.cdc.gov/hiv/pdf/library/reports/surveillance/cdc-hiv-HSSR_MMP_2012.pdf)  
17  
18  
19 43. Grabovac I, Veronese N, Stefanac S, Haider S, Jackson SE, Koyanagi A, et al. Human  
20 Immunodeficiency Virus Infection and Diverse Physical Health Outcomes: An Umbrella Review  
21 of Meta-analyses of Observational Studies. *Clin Infect Dis*. 2019;ciz539.  
22  
23 44. Nasi M, De Biasi S, Gibellini L, Bianchini E, Pecorini S, Bacca V, et al. Ageing and  
24 inflammation in patients with HIV infection: Ageing, inflammation and HIV infection. *Clin Exp*  
25 *Immunol*. 2017;187:44–52.  
26  
27  
28 45. Judge C., O’Donovan C., Callaghan G., Gaoatswe G., O’Shea D. Gender dysphoria -  
29 prevalence and co-morbidities in an Irish adult population. *Front Endocrinol*. 2014;5:87.  
30  
31 46. Cheung AS, Ooi O, Leemaqz S, Cundill P, Silberstein N, Bretherton I, et al.  
32 Sociodemographic and clinical characteristics of transgender adults in Australia. *Transgender*  
33 *Health*. 2018;3:229–38.  
34  
35 47. Swartz JA, Ducheny K, Holloway T, Stokes L, Willis S, Kuhns LM. A Latent Class Analysis  
36 of Chronic Health Conditions Among HIV-Positive Transgender Women of Color. *AIDS Behav*  
37 [Internet]. 2019 [cited 2019 Oct 2]; Available from: [http://link.springer.com/10.1007/s10461-](http://link.springer.com/10.1007/s10461-019-02543-3)  
38 [019-02543-3](http://link.springer.com/10.1007/s10461-019-02543-3)  
39  
40  
41 48. Fisher ES, Whaley FS, Krushat WM, Malenka DJ, Fleming C, Baron JA, et al. The accuracy  
42 of Medicare’s hospital claims data: progress has been made, but problems remain. *Am J Public*  
43 *Health*. 2011;  
44  
45 49. Reisner SL, Radix A, Deutsch MB. Integrated and Gender-Affirming Transgender Clinical  
46 Care and Research. *J Acquir Immune Defic Syndr* 1999. 2016;72 Suppl 3:S235–42.  
47  
48  
49  
50  
51  
52  
53  
54  
55  
56  
57  
58  
59  
60

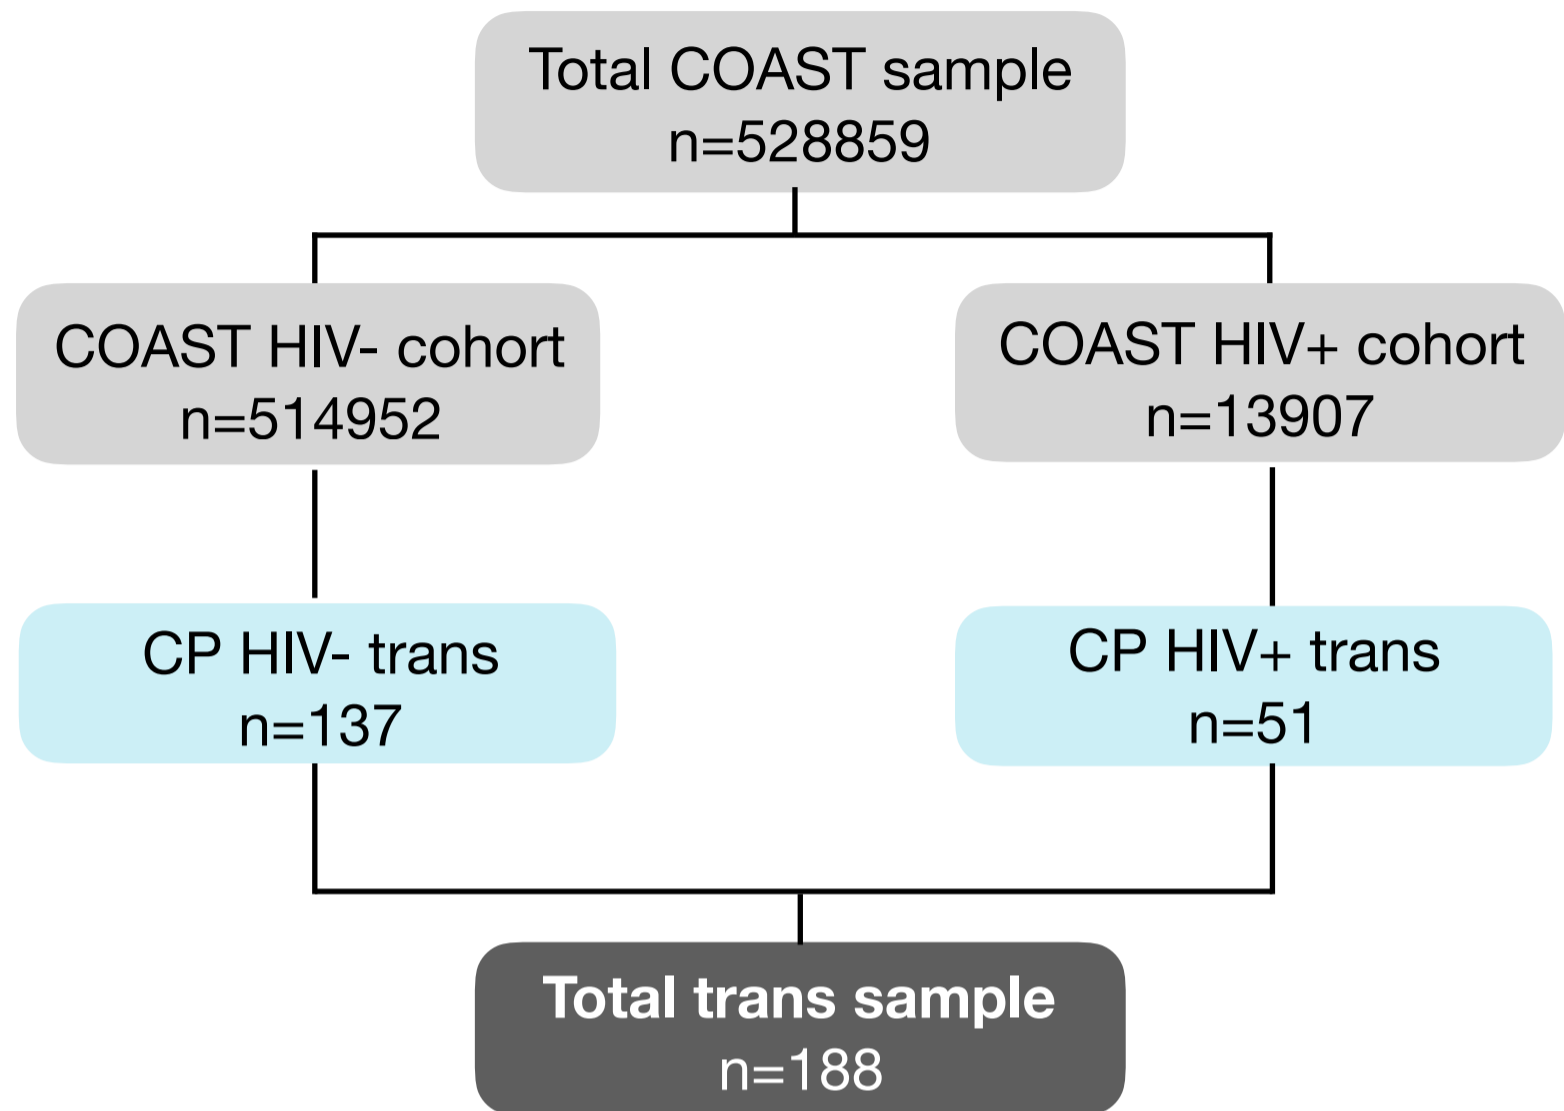

1  
2  
3  
4  
5  
6  
7  
8  
9  
10  
11  
12  
13  
14  
15  
16  
17  
18  
19  
20  
21  
22  
23  
24  
25  
26  
27  
28  
29  
30  
31  
32  
33  
34  
35  
36  
37  
38  
39  
40  
41  
42  
43  
44  
45  
46  
47  
48  
49  
50  
51  
52  
53  
54  
55  
56  
57  
58  
59  
60

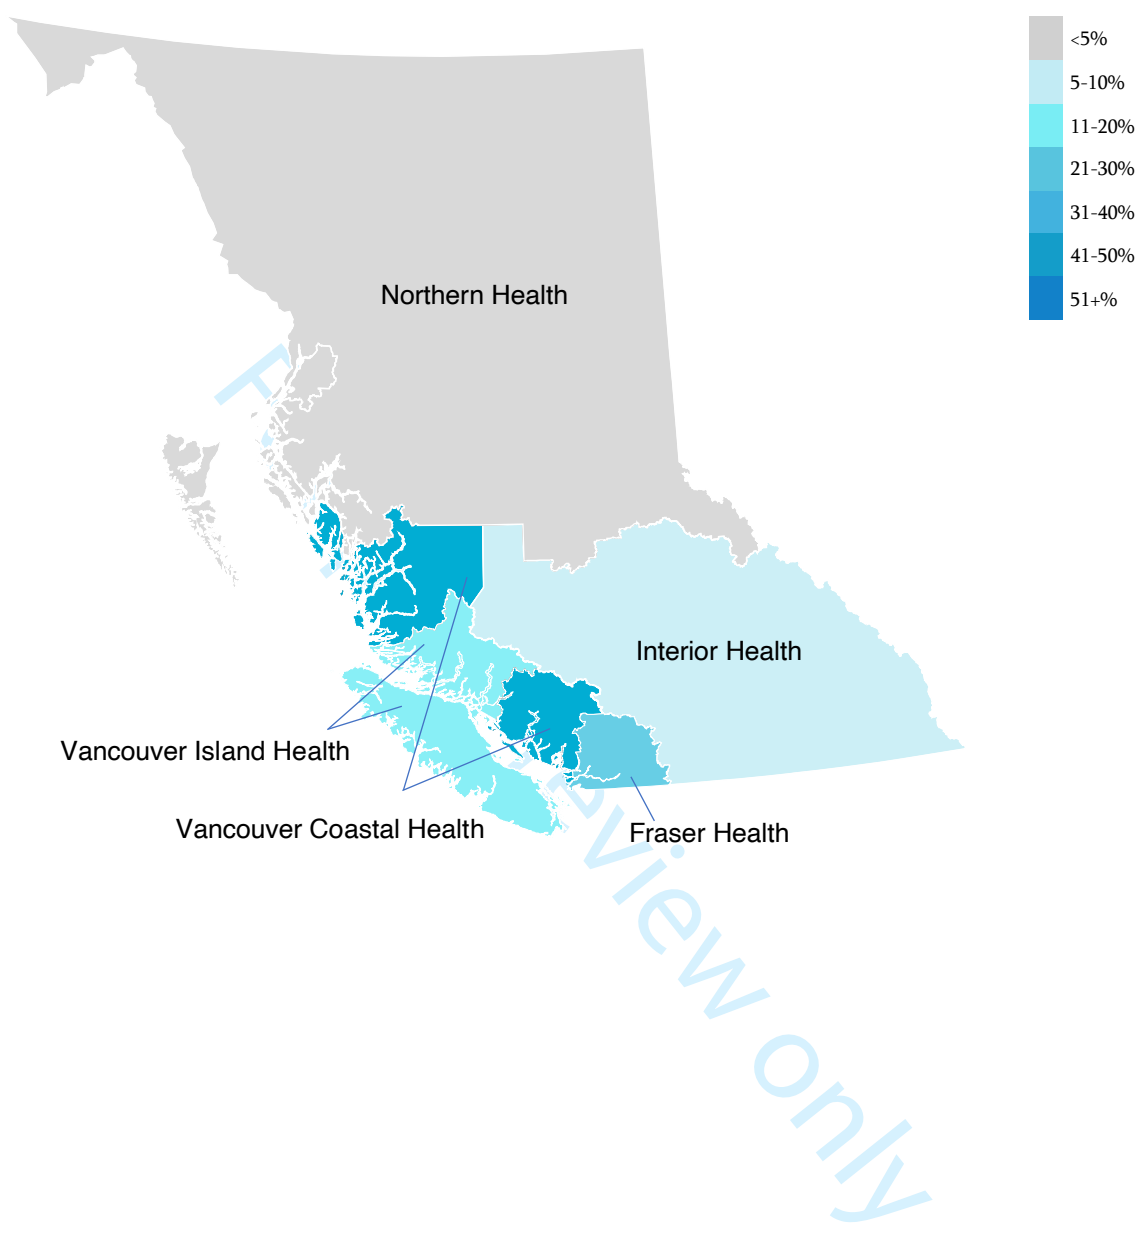

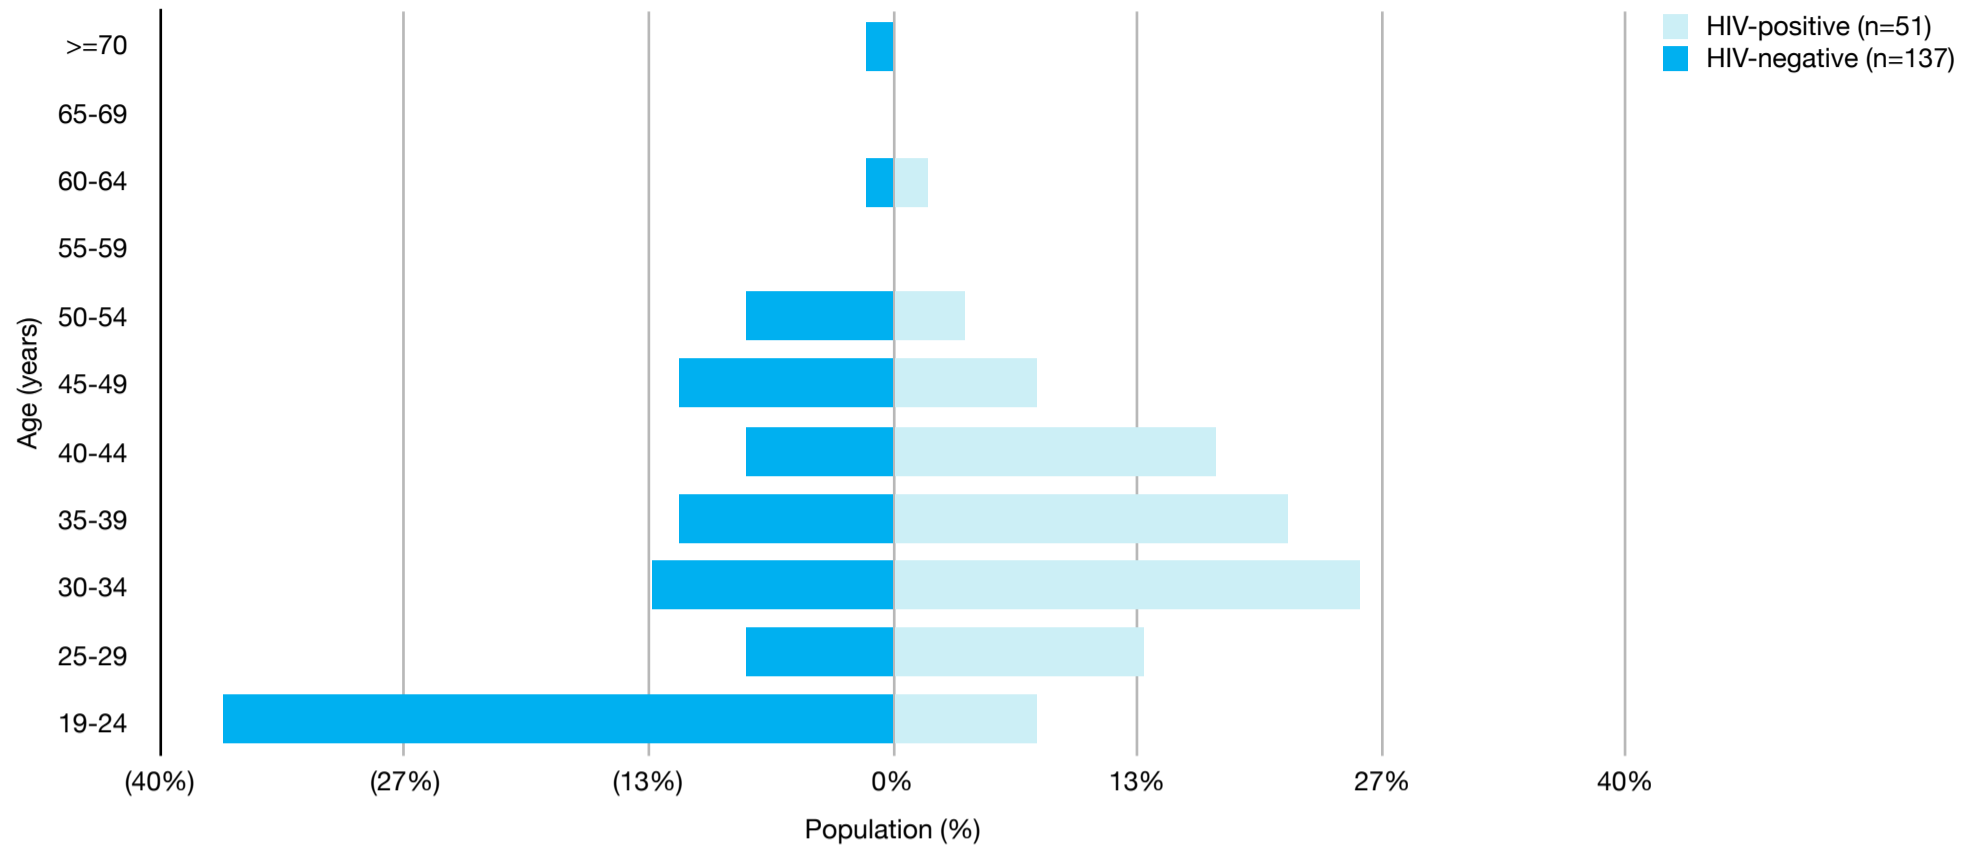



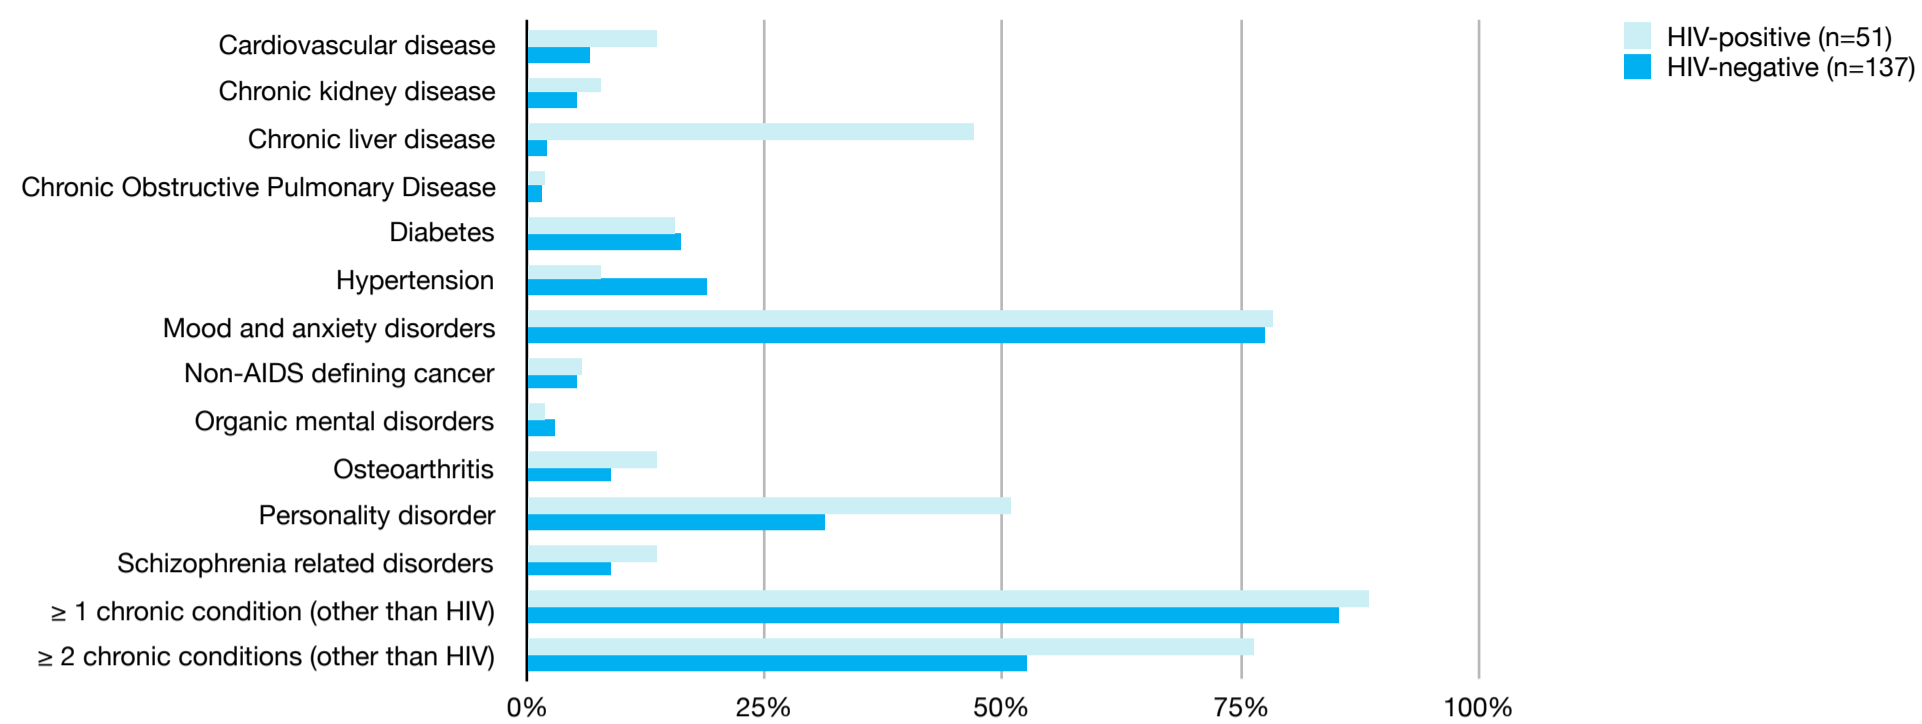

## Supplementary material

**Data sources and description of data elements**

| <b>Data source</b>          | <b>Data steward</b>                                            | <b>Description</b>                                                                                                                                                                                                                             | <b>Data elements provided for this study</b> |
|-----------------------------|----------------------------------------------------------------|------------------------------------------------------------------------------------------------------------------------------------------------------------------------------------------------------------------------------------------------|----------------------------------------------|
| Medical Services Plan       | British Columbia Ministry of Health                            | For individuals covered by the provincial universal health insurance plan- Medically necessary services provided by fee-for-service physicians and other healthcare providers, laboratory services, diagnostic procedures, dental/oral surgery | ICD-9 and ICD-10 codes                       |
| Consolidation file          | British Columbia Ministry of Health                            | Demographic data on individuals receiving or registered to receive care in BC, pooled from multiple PopData sources                                                                                                                            | Sociodemographics                            |
| Discharge Abstract Database | British Columbia Ministry of Health                            | Demographic, administrative and clinical data for inpatient hospital discharges and day surgeries                                                                                                                                              | ICD-9 and ICD-10 codes                       |
| Vital statistics deaths     | British Columbia Vital Statistics Agency                       | Records of all registered deaths in BC                                                                                                                                                                                                         | Death data                                   |
| Pharmacare                  | British Columbia Ministry of Health                            | Data related to prescription drugs dispensed under the BC public drug insurance program.                                                                                                                                                       | Prescription drug name/identifier            |
| Pharmanet                   | British Columbia Ministry of Health Data Stewardship Committee | Data related to prescription drugs dispensed by community and outpatient pharmacies                                                                                                                                                            | Prescription drug name/identifier            |

## Supplementary material

|                                       |                                                    |                                                                                                                                                                   |                                                                            |
|---------------------------------------|----------------------------------------------------|-------------------------------------------------------------------------------------------------------------------------------------------------------------------|----------------------------------------------------------------------------|
| Drug Treatment Program and laboratory | British Columbia Centre for Excellence in HIV/AIDS | Antiretroviral therapy use history, laboratory testing, immunological and virologic testing, and demographic data on PLWH who have accessed antiretrovirals in BC | Providers-reported transgender status, laboratory confirmed HIV serostatus |
|---------------------------------------|----------------------------------------------------|-------------------------------------------------------------------------------------------------------------------------------------------------------------------|----------------------------------------------------------------------------|

**Prescription drugs with drug identification numbers (DIN)s**

|                          | Generic Name                   | DIN     |
|--------------------------|--------------------------------|---------|
| <b>Transfeminine</b>     |                                |         |
| <b>Androgen Blockers</b> |                                |         |
| <b>Spirolactone</b>      |                                |         |
|                          | SPIRONOLACTONE                 | 28606   |
|                          | SPIRONOLACTONE                 | 613215  |
|                          | SPIRONOLACTONE                 | 285455  |
|                          | SPIRONOLACTONE                 | 613223  |
|                          | SPIRONOLACT/HYDROCHLOROTHIAZID | 180408  |
|                          | SPIRONOLACT/HYDROCHLOROTHIAZID | 613231  |
|                          | SPIRONOLACT/HYDROCHLOROTHIAZID | 594377  |
|                          | SPIRONOLACT/HYDROCHLOROTHIAZID | 657182  |
| <b>Cyproterone</b>       |                                |         |
|                          | ETHINYL ESTRADIOL/CYPROTERONE  | 2233542 |
|                          | NO GENERIC FORMULARY           | 634514  |
|                          | CYPROTERONE ACETATE            | 704431  |
|                          | CYPROTERONE ACETATE            | 2229449 |
|                          | CYPROTERONE ACETATE            | 2229723 |
|                          | CYPROTERONE ACETATE            | 2232872 |
|                          | CYPROTERONE ACETATE            | 2245898 |
|                          | CYPROTERONE ACETATE            | 704423  |
| <b>Finasteride</b>       |                                |         |
|                          | FINASTERIDE                    | 2010909 |
|                          | FINASTERIDE                    | 2238213 |
| <b>Dutasteride</b>       |                                |         |
|                          | DUTASTERIDE                    | 2247813 |
| <b>Estrogens</b>         |                                |         |
| <b>Estrogen</b>          |                                |         |
|                          | ESTROGENS,CONJUGATED           | 830240  |
|                          | ESTROGENS,CONJUGATED           | 831395  |

## Supplementary material

|    |                                |         |
|----|--------------------------------|---------|
| 1  |                                |         |
| 2  |                                |         |
| 3  | ETHYNODIOL D-ETHINYL ESTRADIOL | 28630   |
| 4  | ETHYNODIOL D-ETHINYL ESTRADIOL | 469327  |
| 5  | NORETHINDRONE-MESTRANOL        | 22608   |
| 6  | NORETHINDRONE-MESTRANOL        | 22659   |
| 7  | NORETHINDRONE A-E ESTRADIOL    | 297143  |
| 8  | NORETHINDRONE A-E ESTRADIOL    | 315966  |
| 9  | NORETHINDRONE-ETHINYL ESTRAD   | 317047  |
| 10 | NORETHINDRONE-ETHINYL ESTRAD   | 372846  |
| 11 | NORETHINDRONE-ETHINYL ESTRAD   | 373265  |
| 12 | NORETHINDRONE-ETHINYL ESTRAD   | 531006  |
| 13 | NORETHINDRONE-ETHINYL ESTRAD   | 538590  |
| 14 | NORETHINDRONE-ETHINYL ESTRAD   | 602957  |
| 15 | NORETHINDRONE-ETHINYL ESTRAD   | 620947  |
| 16 | NORETHINDRONE-ETHINYL ESTRAD   | 2187086 |
| 17 | NORETHINDRONE-ETHINYL ESTRAD   | 2187108 |
| 18 | NORETHINDRONE-ETHINYL ESTRAD   | 2189054 |
| 19 | NORGESTREL-ETHINYL ESTRADIOL   | 34207   |
| 20 | NORGESTREL-ETHINYL ESTRADIOL   | 300640  |
| 21 | LEVONORGESTREL-ETH ESTRA       | 579386  |
| 22 | LEVONORGESTREL-ETH ESTRA       | 707600  |
| 23 | LEVONORGESTREL-ETH ESTRA       | 782416  |
| 24 | LEVONORGESTREL-ETH ESTRA       | 782432  |
| 25 | LEVONORGESTREL-ETH ESTRA       | 2042320 |
| 26 | NORGESTREL-ETHINYL ESTRADIOL   | 2043033 |
| 27 | LEVONORGESTREL-ETH ESTRA       | 2043726 |
| 28 | NORGESTIMATE-ETHINYL ESTRADIOL | 2258560 |
| 29 | NORETHINDRONE-MESTRANOL        | 30333   |
| 30 | NORETHINDRONE-MESTRANOL        | 30341   |
| 31 | LEVONORGESTREL-ETH ESTRA       | 2236974 |
| 32 | ETHYNODIOL D-ETHINYL ESTRADIOL | 471526  |
| 33 | NORETHINDRONE-ETHINYL ESTRAD   | 340731  |
| 34 | NORETHINDRONE-MESTRANOL        | 340758  |
| 35 | NORETHINDRONE A-E ESTRADIOL    | 343838  |
| 36 | NORETHINDRONE A-E ESTRADIOL    | 353027  |
| 37 | NORETHINDRONE-ETHINYL ESTRAD   | 372838  |
| 38 | NORETHINDRONE-ETHINYL ESTRAD   | 373273  |
| 39 | NORETHINDRONE-ETHINYL ESTRAD   | 531014  |
| 40 | NORETHINDRONE-ETHINYL ESTRAD   | 602965  |
| 41 | NORETHINDRONE-ETHINYL ESTRAD   | 695734  |
| 42 | NORETHINDRONE-ETHINYL ESTRAD   | 2187094 |
| 43 |                                |         |
| 44 |                                |         |
| 45 |                                |         |
| 46 |                                |         |
| 47 |                                |         |
| 48 |                                |         |
| 49 |                                |         |
| 50 |                                |         |
| 51 |                                |         |
| 52 |                                |         |
| 53 |                                |         |
| 54 |                                |         |
| 55 |                                |         |
| 56 |                                |         |
| 57 |                                |         |
| 58 |                                |         |
| 59 |                                |         |
| 60 |                                |         |

## Supplementary material

1  
2  
3  
4  
5  
6  
7  
8  
9  
10  
11  
12  
13  
14  
15  
16  
17  
18  
19  
20  
21  
22  
23  
24  
25  
26  
27  
28  
29  
30  
31  
32  
33  
34  
35  
36  
37  
38  
39  
40  
41  
42  
43  
44  
45  
46  
47  
48  
49  
50  
51  
52  
53  
54  
55  
56  
57  
58  
59  
60

|                                |         |
|--------------------------------|---------|
| NORETHINDRONE-ETHINYL ESTRAD   | 2187116 |
| NORETHINDRONE-ETHINYL ESTRAD   | 2189062 |
| ETHINYL ESTRADIOL/NORETH AC    | 2242531 |
| NORGESTREL-ETHINYL ESTRADIOL   | 340766  |
| NORGESTREL-ETHINYL ESTRADIOL   | 342815  |
| LEVONORGESTREL-ETH ESTRA       | 586609  |
| LEVONORGESTREL-ETH ESTRA       | 707503  |
| LEVONORGESTREL-ETH ESTRA       | 782424  |
| LEVONORGESTREL-ETH ESTRA       | 782440  |
| LEVONORGESTREL-ETH ESTRA       | 2042339 |
| NORGESTREL-ETHINYL ESTRADIOL   | 2043041 |
| LEVONORGESTREL-ETH ESTRA       | 2043734 |
| NORGESTIMATE-ETHINYL ESTRADIOL | 2258587 |
| LEVONORGESTREL-ETH ESTRA       | 2236975 |
| NORGESTIMATE-ETHINYL ESTRADIOL | 1968440 |
| NORGESTIMATE-ETHINYL ESTRADIOL | 2028700 |
| NORGESTIMATE-ETHINYL ESTRADIOL | 1992872 |
| NORGESTIMATE-ETHINYL ESTRADIOL | 2029421 |
| DESOGESTREL-ETHINYL ESTRADIOL  | 2042487 |
| DESOGESTREL-ETHINYL ESTRADIOL  | 2042541 |
| DESOGESTREL-ETHINYL ESTRADIOL  | 2042479 |
| DESOGESTREL-ETHINYL ESTRADIOL  | 2042533 |
| ESTRADIOL/NORETH AC            | 2241835 |
| ESTRADIOL/NORETH AC            | 2241837 |
| LEVONORGESTREL                 | 2241674 |
| ESTROGEN,CON/M-PROGEST ACET    | 2242878 |
| ESTROGEN,CON/M-PROGEST ACET    | 2242879 |
| ESTRADIOL/NORETH AC            | 2243529 |
| ESTRADIOL/NORETH AC            | 2243530 |
| ETHINYL ESTRADIOL/DROSPIRENONE | 2261723 |
| ETHINYL ESTRADIOL/DROSPIRENONE | 2261731 |
| ETONOGESTREL/ETHINYL ESTRADIOL | 2253186 |
| ETHINYL ESTRADIOL/NORELGEST    | 2248297 |
| DIENESTROL                     | 441295  |
| DIETHYLSTILBESTROL             | 3360    |
| DIETHYLSTILBESTROL             | 2091461 |
| DIETHYLSTILBESTROL             | 2091488 |
| ESTRADIOL                      | 464791  |
| ESTRADIOL                      | 2148587 |
| ESTRADIOL                      | 464805  |

## Supplementary material

1  
2  
3  
4  
5  
6  
7  
8  
9  
10  
11  
12  
13  
14  
15  
16  
17  
18  
19  
20  
21  
22  
23  
24  
25  
26  
27  
28  
29  
30  
31  
32  
33  
34  
35  
36  
37  
38  
39  
40  
41  
42  
43  
44  
45  
46  
47  
48  
49  
50  
51  
52  
53  
54  
55  
56  
57  
58  
59  
60

|                      |         |
|----------------------|---------|
| ESTRADIOL            | 2148595 |
| ESTRADIOL VALERATE   | 29238   |
| ESTRADIOL            | 756849  |
| ESTRADIOL            | 2237807 |
| ESTRADIOL            | 2243722 |
| ESTRADIOL            | 2245676 |
| ESTRADIOL            | 756857  |
| ESTRADIOL            | 2204428 |
| ESTRADIOL            | 2231509 |
| ESTRADIOL            | 2237808 |
| ESTRADIOL            | 2243724 |
| ESTRADIOL            | 2244000 |
| ESTRADIOL            | 2246967 |
| ESTRADIOL            | 756792  |
| ESTRADIOL            | 2204444 |
| ESTRADIOL            | 2231510 |
| ESTRADIOL            | 2244002 |
| ESTRADIOL            | 2246969 |
| ESTRADIOL            | 2168898 |
| ESTRADIOL            | 2204436 |
| ESTRADIOL            | 2244001 |
| ESTRADIOL            | 2246968 |
| ESTRADIOL            | 2225190 |
| ESTRADIOL            | 2204401 |
| ESTRADIOL            | 2238704 |
| ESTRADIOL            | 2243999 |
| ESTRADIOL            | 2241332 |
| ESTRADIOL            | 2247499 |
| ESTRADIOL            | 2247500 |
| ESTROGENS,CONJUGATED | 2569    |
| ESTROGENS,CONJUGATED | 2043394 |
| ESTROGENS,CONJUGATED | 2230891 |
| ESTROGENS,CONJUGATED | 2239654 |
| ESTROGENS,CONJUGATED | 2577    |
| ESTROGENS,CONJUGATED | 265470  |
| ESTROGENS,CONJUGATED | 587281  |
| ESTROGENS,CONJUGATED | 2043408 |
| ESTROGENS,CONJUGATED | 2089    |
| ESTROGENS,CONJUGATED | 2043440 |
| ESTROGENS,CONJUGATED | 403466  |

## Supplementary material

1  
2  
3  
4  
5  
6  
7  
8  
9  
10  
11  
12  
13  
14  
15  
16  
17  
18  
19  
20  
21  
22  
23  
24  
25  
26  
27  
28  
29  
30  
31  
32  
33  
34  
35  
36  
37  
38  
39  
40  
41  
42  
43  
44  
45  
46  
47  
48  
49  
50  
51  
52  
53  
54  
55  
56  
57  
58  
59  
60

|                                |          |
|--------------------------------|----------|
| ESTROGENS,CONJUGATED           | 2043416  |
| ESTROGENS,CONJUGATED           | 2230892  |
| ESTROGENS,CONJUGATED           | 2239655  |
| ESTROGENS,CONJUGATED           | 2585     |
| ESTROGENS,CONJUGATED           | 265489   |
| ESTROGENS,CONJUGATED           | 587303   |
| ESTROGENS,CONJUGATED           | 2043424  |
| ESTROGENS,CONJUGATED           | 2043432  |
| ESTROGENS,CONJUGATED           | 2043386  |
| ME-TESTOSTERONE/ESTROGEN,CON   | 53538    |
| ESTROPIPATE                    | 282685   |
| ESTROPIPATE                    | 2089769  |
| ESTROPIPATE                    | 282677   |
| ESTROPIPATE                    | 2089777  |
| ESTROPIPATE                    | 2089793  |
| ESTRADIOL/NORETH AC            | 2108186  |
| NORGESTIMATE-ETHINYL ESTRADIOL | 2229064  |
| NORGESTIMATE-ETHINYL ESTRADIOL | 2229218  |
| NORGESTIMATE-ETHINYL ESTRADIOL | 2229226  |
| ETHINYL ESTRADIOL/CYPROTERONE  | 2233542  |
| ETHINYL ESTRADIOL/NORELGEST    | 2246340  |
| NO GENERIC FORMULARY           | 66124057 |
| NO GENERIC FORMULARY           | 66124058 |
| NO GENERIC FORMULARY           | 66124060 |
| NO GENERIC FORMULARY           | 66124061 |
| NO GENERIC FORMULARY           | 66124062 |
| NO GENERIC FORMULARY           | 66124063 |
| NO GENERIC FORMULARY           | 66124064 |

---

**Progestogens**

---

**Progesterone**

---

|                          |          |
|--------------------------|----------|
| PROGESTERONE,MICRONIZED  | 2241013  |
| MEDROXYPROGESTERONE ACET | 30848    |
| MEDROXYPROGESTERONE ACET | 30856    |
| MEDROXYPROGESTERONE ACET | 585092   |
| NO GENERIC FORMULARY     | 66123240 |
| MEDROXYPROGESTERONE ACET | 708917   |
| MEDROXYPROGESTERONE ACET | 2148552  |
| MEDROXYPROGESTERONE ACET | 2221284  |
| MEDROXYPROGESTERONE ACET | 2229838  |
| MEDROXYPROGESTERONE ACET | 2244726  |

## Supplementary material

|    |                               |         |
|----|-------------------------------|---------|
| 1  |                               |         |
| 2  |                               |         |
| 3  | MEDROXYPROGESTERONE ACET      | 2246627 |
| 4  | MEDROXYPROGESTERONE ACET      | 30937   |
| 5  | MEDROXYPROGESTERONE ACET      | 2010739 |
| 6  | MEDROXYPROGESTERONE ACET      | 2148560 |
| 7  | MEDROXYPROGESTERONE ACET      | 2221292 |
| 8  | MEDROXYPROGESTERONE ACET      | 2229839 |
| 9  | MEDROXYPROGESTERONE ACET      | 2244727 |
| 10 | MEDROXYPROGESTERONE ACET      | 2246628 |
| 11 | MEDROXYPROGESTERONE ACET      | 729973  |
| 12 | MEDROXYPROGESTERONE ACET      | 2010933 |
| 13 | MEDROXYPROGESTERONE ACET      | 2148579 |
| 14 | MEDROXYPROGESTERONE ACET      | 2221306 |
| 15 | MEDROXYPROGESTERONE ACET      | 2229840 |
| 16 | MEDROXYPROGESTERONE ACET      | 2246629 |
| 17 | MEDROXYPROGESTERONE ACET      | 30945   |
| 18 | MEDROXYPROGESTERONE ACET      | 2267640 |
| 19 | MEDROXYPROGESTERONE ACET      | 37605   |
| 20 | MEDROXYPROGESTERONE ACET      | 2166704 |
| 21 | MEDROXYPROGESTERONE ACET      | 739952  |
| 22 | MEDROXYPROGESTERONE ACET      | 1977652 |
| 23 | MEDROXYPROGESTERONE ACET      | 2128470 |
| 24 | MEDROXYPROGESTERONE ACET      | 2243005 |
| 25 | NORETHINDRONE                 |         |
| 26 | PROGESTERONE,MICRONIZED       |         |
| 27 | PROGESTERONE                  |         |
| 28 | PROGESTERONE                  |         |
| 29 | PROGESTERONE                  |         |
| 30 | PROGESTERONE                  |         |
| 31 | LEVONORGESTREL                |         |
| 32 |                               |         |
| 33 | <b>Transmasculine</b>         |         |
| 34 | <b>Testosterone</b>           |         |
| 35 | TESTOSTERONE                  | 2249499 |
| 36 | TESTOSTERONE CYPIONATE        | 30783   |
| 37 | TESTOSTERONE PROPIONATE       | 1977571 |
| 38 | TESTOSTERONE CYPIONATE        | 1977601 |
| 39 | TESTOSTERONE CYPIONATE        | 2220318 |
| 40 | TESTOSTERONE CYPIONATE        | 2246063 |
| 41 | TESTOSTERONE ENANTHATE        | 29246   |
| 42 | TESTOSTERONE ENANTHATE        | 716936  |
| 43 | TESTOSTERONE ENANTHATE        | 739944  |
| 44 | TESTOSTERONE UNDECANOATE      | 782327  |
| 45 | TESTOSTERONE ENANTHATE/ESTRAD | 108278  |
| 46 | TESTOSTERONE ENANTHATE/ESTRAD | 2061031 |
| 47 | TESTOSTERONE                  | 2239653 |
| 48 | TESTOSTERONE                  | 2245346 |
| 49 | TESTOSTERONE                  | 2245345 |
| 50 | TESTOSTERONE                  | 2245972 |
| 51 |                               |         |
| 52 |                               |         |
| 53 |                               |         |
| 54 |                               |         |
| 55 |                               |         |
| 56 |                               |         |
| 57 |                               |         |
| 58 |                               |         |
| 59 |                               |         |
| 60 |                               |         |



## Supplementary material

**Chronic condition case definitions**

| <b>Chronic condition</b> |                             | <b>Case definition</b>                                                                                                                                                                                                                                                                                                                                                                  | <b>Codes</b>                                                                                                                                                                                                                                                                                                          |
|--------------------------|-----------------------------|-----------------------------------------------------------------------------------------------------------------------------------------------------------------------------------------------------------------------------------------------------------------------------------------------------------------------------------------------------------------------------------------|-----------------------------------------------------------------------------------------------------------------------------------------------------------------------------------------------------------------------------------------------------------------------------------------------------------------------|
| Cardiovascular disease*  | Acute myocardial infarction | 1 or more hospitalizations with relevant ICD codes                                                                                                                                                                                                                                                                                                                                      | ICD-10:<br>I21 Acute myocardial infarction<br>I22 Subsequent myocardial infarction                                                                                                                                                                                                                                    |
|                          | Ischemic heart disease      | At least one of the following:<br><br>2 medical visits with Angina ICD-9 code 413 plus 1 heart disease prescription in 365 days; or 1 specialist visit with Angina ICD-9 code 413 plus 1 prescription in 365 days; or 2 medical visits with two ICD9 codes 410, 411, 412, 413, 414 in 365 days; or 1 CCI/CCP CABG,PCI/PCTA procedure code; or 1 hospitalization with relevant ICD code. | ICD-9:<br>410 Acute myocardial infarction<br>ICD-10:<br>I20 Angina pectoris<br>I21 Acute myocardial infarction I<br>22 Subsequent myocardial infarction<br>I23 Certain current complications following acute myocardial infarction<br>I24 Other acute ischaemic heart diseases<br>I25 Chronic ischaemic heart disease |
|                          | Chronic heart failure       | 1 or more hospitalizations or 2 or more medical visits in 365 days with relevant ICD codes                                                                                                                                                                                                                                                                                              | ICD-9:<br>410 Acute myocardial infarction<br>411 Other acute and subacute forms of ischaemic heart disease<br>412 Old myocardial infarction<br>413 Angina pectoris<br>414 Other forms of chronic ischaemic heart disease<br>ICD-10:<br>I50 Heart failure                                                              |
|                          | Stroke- hospital            | 1 or more hospitalizations with relevant ICD codes                                                                                                                                                                                                                                                                                                                                      | ICD-9:<br>428 Heart failure<br>ICD-10:<br>H34.1 Central retinal artery occlusion<br>I60 Subarachnoid hemorrhage<br>I61 Intracerebral haemorrhage<br>I63 Cerebral infarction (exclude<br>I63.6 Cerebral infarction due to                                                                                              |

## Supplementary material

cerebral venous thrombosis, nonpyogenic)  
 I64 Stroke, not specified as haemorrhage or infarction  
 362.3 Retinal vascular occlusion  
 430 Subarachnoid hemorrhage  
 431 Intracerebral hemorrhage  
 433.x1 Occlusion and stenosis of precerebral arteries  
 434.x Occlusion cerebral arteries  
 436 Acute but ill-defined cerebrovascular disease

*Excludes any traumatic brain injury*

Transient ischemic attack      1 or more hospitalizations with relevant ICD codes

ICD-10:  
 H34.0 Transient retinal artery occlusion  
 G45.0 Vertebro-basilar artery syndrome  
 G45.1 Carotid artery syndrome (hemispheric)  
 G45.2 Multiple and bilateral precerebral artery syndromes  
 G45.3 Amaurosis fugax  
 G45.8 Other transient cerebral ischemic attacks and related syndromes  
 G45.9 Transient cerebral ischemic attack, unspecified

ICD-9:  
 435 Transient cerebral ischemia

*Excludes any traumatic brain injury*

Chronic kidney disease\*

1 or more hospitalizations or 2 or more medical visits in 365 days with relevant ICD codes

ICD-10:  
 N01 Rapidly progressive nephritic syndrome  
 N03 Chronic nephritic syndrome  
 N04 Nephrotic syndrome  
 N05 Unspecified nephritic syndrome  
 N06 Isolated proteinuria with specified morphological lesion  
 N07 Hereditary nephropathy, not elsewhere classified

## Supplementary material

N18 Chronic kidney disease  
 N19 Unspecified kidney failure  
 N26 Unspecified contracted kidney  
 N27 Small kidney of unknown cause

## ICD-9:

581 Nephrotic syndrome 582  
 Chronic glomerulonephritis  
 583 Nephritis and nephropathy,  
 not specified as acute or chronic  
 585 Chronic renal failure 586  
 Renal failure, unspecified  
 587 Renal sclerosis, unspecified  
 589 Small kidney of unknown  
 cause

Chronic liver disease

1 or more  
 hospitalization or  
 medical visit with  
 relevant diagnosis  
 within 365 days

## ICD-9:

571.0 Alcoholic fatty liver  
 571.2 Alcoholic cirrhosis of liver  
 571.3 Alcoholic liver damage,  
 unspecified  
 571.4 Chronic hepatitis  
 571.5 Cirrhosis of liver without  
 mention of alcohol  
 571.6 Billiary cirrhosis  
 571.8 Other chronic nonalcoholic  
 liver disease  
 571.9 Unspecified chronic liver  
 disease without mention of  
 alcohol  
 070.3 Viral hepatitis B without  
 mention of hepatic coma  
 070.30 Viral hepatitis B without  
 mention of hepatic coma, acute or  
 unspecified, without mention of  
 hepatitis delta  
 070.31 Viral hepatitis B without  
 mention of hepatic coma, acute or  
 unspecified, with hepatitis delta  
 070.32 Viral hepatitis B without  
 mention of hepatic coma, chronic,  
 without mention of hepatitis delta  
 070.33 Viral hepatitis B without  
 mention of hepatic coma, chronic,  
 with hepatitis delta

## Supplementary material

070.52 Hepatitis delta without mention of active Hepatitis B disease or hepatic coma  
 V02.61 Hepatitis B carrier  
 070.42 Hepatitis delta without mention of active Hepatitis B disease with hepatic coma  
 070.54 Chronic hepatitis C without mention of hepatic coma  
 V02.62 Hepatitis C carrier

## ICD-10:

J41 Simple and mucopurulent chronic bronchitis  
 J42 Unspecified chronic bronchitis  
 J43 Emphysema  
 J44 Other chronic obstructive pulmonary disease

## ICD-9:

491 Chronic bronchitis  
 492 Emphysema  
 496 Chronic airways obstruction, not elsewhere classified

## ICD-10:

E10 Type 1 diabetes mellitus  
 E11 Type 2 diabetes mellitus  
 E13 Other specified diabetes mellitus  
 E14 Unspecified diabetes mellitus

## ICD-9:

250 Diabetes mellitus

Chronic Obstructive  
 Pulmonary Disease\*

1 or more hospitalization or 2 or more medical visits within 365 days

Diabetes Mellitus\*

At least 1 of the following:

1 hospitalization or 2 medical visits in 365 days with relevant ICD codes; or 2 or more insulin prescriptions in 365 days; or 2 or more oral antihyperglycemic (not including metformin) prescriptions in 365 days; or 1 insulin and 1 oral antihyperglycemic (including metformin) in 365 days; or 2 metformin prescriptions and 1 medical visit in one year with relevant ICD codes.

## Supplementary material

## Hypertension\*

*Excludes gestational diabetes.*

1 or more hospitalizations or 2 or more medical visits within 2 years with relevant ICD codes.

*Excludes gestational hypertension.*

ICD-10:

I10 Essential (primary) hypertension

I11 Hypertensive heart disease

I12 Hypertensive renal disease

I13 Hypertensive heart and renal disease

I15 Secondary hypertension

ICD-9:

401 Essential hypertension

402 Hypertensive heart disease

403 Hypertensive renal disease

404 Hypertensive heart and renal disease

405 Secondary hypertension

ICD-10:

F30 Manic episode

F31 Bipolar affective disorder

F32 Depressive episode F33

Recurrent depressive disorder

F34 Persistent mood [affective] disorders

F38 Other mood [affective] disorders

F39 Unspecified mood [affective] disorder

F40 Phobic anxiety disorders

F41 Other anxiety disorders

F42 Obsessive-compulsive disorder

F43 Reaction to severe stress, and adjustment disorders

F44 Dissociative (conversion) disorders F45 Somatoform disorders

F48 Other neurotic disorders

F68 Other disorders of adult personality & behavior

F68 Other disorders of adult personality & behavior

ICD-9:

## Mood and anxiety disorders\*

1 or more hospitalizations with a relevant ICD code or 2 or more medical visits with a relevant code within 2 years

For peer review only

## Supplementary material

296 Affective psychoses 300  
Neurotic disorders 311 Depressive  
disorder, not elsewhere classified

MSP DX Code:  
50B Anxiety/Depression  
*Cancer case definition details  
available from the British  
Columbia Cancer Agency:  
[http://www.bccancer.bc.ca/health-  
info/types-of-cancer](http://www.bccancer.bc.ca/health-info/types-of-cancer)*

Non-AIDS defining  
cancer† All prevalent cancer  
cases were included,  
with the exception of  
AIDS defining  
malignancies  
(Kaposi's sarcoma,  
non-Hodgkin's  
lymphoma, invasive  
cervical cancer)

Organic mental  
disorders

1 or more medical  
visits or  
hospitalizations with  
relevant diagnoses  
within 365 days

ICD-9:  
290.x Dementias  
294.x Other organic psychotic  
conditions  
331.x Alzheimer's

ICD-10:  
F00.x Dementia in Alzheimer's  
disease  
F01.x Vascular Dementia  
F02.x Dementia in other disease  
classified elsewhere  
F03.x Unspecified dementia  
F04 Amnestic disorder due to  
physiological condition  
F06 Other mental disorders due to  
known physiological condition  
F09 Unspecified mental disorder  
due to known physiological  
condition  
G30 Alzheimer's disease with  
early onset  
ICD-10:  
M15 Polyarthrosis  
M16 Coxarthrosis [arthrosis of  
hip]  
M17 Gonarthrosis [arthrosis of  
knee]  
M18 Arthrosis of first  
carpometacarpal joint  
M19 Other arthrosis

Osteoarthritis\*

1 or more  
hospitalization or 2 or  
more medical visits in  
365 days with a  
relevant ICD code

## Supplementary material

|    |                       |                          |                                    |
|----|-----------------------|--------------------------|------------------------------------|
| 1  |                       |                          |                                    |
| 2  |                       |                          |                                    |
| 3  |                       |                          |                                    |
| 4  |                       |                          |                                    |
| 5  |                       |                          | ICD-9:                             |
| 6  |                       |                          | 715 Osteoarthritis and allied      |
| 7  |                       |                          | disorders                          |
| 8  | Personality disorder  | 1 or more                | ICD-9:                             |
| 9  |                       | hospitalizations or      | 301.x Personality disorders        |
| 10 |                       | medical visits with a    |                                    |
| 11 |                       | relevant diagnosis       | ICD-10:                            |
| 12 |                       | within 365 days          | F60.x Specified personality        |
| 13 |                       |                          | disorders                          |
| 14 |                       |                          | F62 Enduring personality           |
| 15 |                       |                          | changes, not attributable to brain |
| 16 |                       |                          | damage and disease                 |
| 17 |                       |                          | F68.1 Intentional production or    |
| 18 |                       |                          | feigning of symptoms or            |
| 19 |                       |                          | disabilities, either physical or   |
| 20 |                       |                          | psychological                      |
| 21 |                       |                          | F68.8 Other specified disorders or |
| 22 |                       |                          | adult personality and behaviour    |
| 23 |                       |                          | F69 Unspecified disorder or adult  |
| 24 |                       |                          | personality and behaviour          |
| 25 |                       |                          | ICD-9:                             |
| 26 |                       |                          | 295.x Schizophrenic disorders      |
| 27 | Schizophrenia related | 1 or more medical visit  | 297.0 Paranoid state, simple       |
| 28 | disorder              | or hospitalizations with | 297.1 Delusional disorder          |
| 29 |                       | relevant diagnoses       | 297.2 Paraphrenia                  |
| 30 |                       | within 365 days          | 297.3 Shared psychotic disorder    |
| 31 |                       |                          |                                    |
| 32 |                       |                          | ICD-10:                            |
| 33 |                       |                          | F20.x Paranoid schizophrenia       |
| 34 |                       |                          | F21.x Schizotypal disorder         |
| 35 |                       |                          | F23.2 Acute schizophrenia-like     |
| 36 |                       |                          | psychotic disorder                 |
| 37 |                       |                          | F25.x Schizoaffective disorders    |
| 38 |                       |                          |                                    |
| 39 |                       |                          |                                    |
| 40 |                       |                          |                                    |
| 41 |                       |                          |                                    |
| 42 |                       |                          |                                    |
| 43 |                       |                          |                                    |
| 44 |                       |                          |                                    |
| 45 |                       |                          |                                    |
| 46 |                       |                          |                                    |
| 47 |                       |                          |                                    |
| 48 |                       |                          |                                    |
| 49 |                       |                          |                                    |
| 50 |                       |                          |                                    |
| 51 |                       |                          |                                    |
| 52 |                       |                          |                                    |
| 53 |                       |                          |                                    |
| 54 |                       |                          |                                    |
| 55 |                       |                          |                                    |
| 56 |                       |                          |                                    |
| 57 |                       |                          |                                    |
| 58 |                       |                          |                                    |
| 59 |                       |                          |                                    |
| 60 |                       |                          |                                    |

\* Case definition adapted from British Columbia Ministry of Health version 2017, April 4 2019 update

† Case-definition adapted from British Columbia Cancer Agency

**The RECORD statement – checklist of items, extended from the STROBE statement, that should be reported in observational studies using routinely collected health data.**

|                           | Item No. | STROBE items                                                                                                                                                                               | Location in manuscript where items are reported | RECORD items                                                                                                                                                                                                                                                                                                                                                                                                                                | Location in manuscript where items are reported |
|---------------------------|----------|--------------------------------------------------------------------------------------------------------------------------------------------------------------------------------------------|-------------------------------------------------|---------------------------------------------------------------------------------------------------------------------------------------------------------------------------------------------------------------------------------------------------------------------------------------------------------------------------------------------------------------------------------------------------------------------------------------------|-------------------------------------------------|
| <b>Title and abstract</b> |          |                                                                                                                                                                                            |                                                 |                                                                                                                                                                                                                                                                                                                                                                                                                                             |                                                 |
|                           | 1        | (a) Indicate the study's design with a commonly used term in the title or the abstract (b) Provide in the abstract an informative and balanced summary of what was done and what was found |                                                 | RECORD 1.1: The type of data used should be specified in the title or abstract. When possible, the name of the databases used should be included.<br><br>RECORD 1.2: If applicable, the geographic region and timeframe within which the study took place should be reported in the title or abstract.<br><br>RECORD 1.3: If linkage between databases was conducted for the study, this should be clearly stated in the title or abstract. | 1.1-3: Title page                               |
| <b>Introduction</b>       |          |                                                                                                                                                                                            |                                                 |                                                                                                                                                                                                                                                                                                                                                                                                                                             |                                                 |
| Background rationale      | 2        | Explain the scientific background and rationale for the investigation being reported                                                                                                       |                                                 |                                                                                                                                                                                                                                                                                                                                                                                                                                             | Introduction (pp 4-5)                           |
| Objectives                | 3        | State specific objectives, including any prespecified hypotheses                                                                                                                           |                                                 |                                                                                                                                                                                                                                                                                                                                                                                                                                             | Introduction (page 5)                           |
| <b>Methods</b>            |          |                                                                                                                                                                                            |                                                 |                                                                                                                                                                                                                                                                                                                                                                                                                                             |                                                 |
| Study Design              | 4        | Present key elements of study design early in the paper                                                                                                                                    |                                                 |                                                                                                                                                                                                                                                                                                                                                                                                                                             | Methods (page 5); Supplementary Material        |
| Setting                   | 5        | Describe the setting, locations, and relevant dates, including periods of recruitment, exposure, follow-up, and data collection                                                            |                                                 |                                                                                                                                                                                                                                                                                                                                                                                                                                             | Methods (page 5)                                |



|                              |   |                                                                                                                                                                                                                                                                                                                                                                                                                                                                                                                                                                                                                                                                                                                              |  |                                                                                                                                                                                                                                                                                                                                                                                                                                                                                                                                                                                                                                                                                                      |                                                                                                            |
|------------------------------|---|------------------------------------------------------------------------------------------------------------------------------------------------------------------------------------------------------------------------------------------------------------------------------------------------------------------------------------------------------------------------------------------------------------------------------------------------------------------------------------------------------------------------------------------------------------------------------------------------------------------------------------------------------------------------------------------------------------------------------|--|------------------------------------------------------------------------------------------------------------------------------------------------------------------------------------------------------------------------------------------------------------------------------------------------------------------------------------------------------------------------------------------------------------------------------------------------------------------------------------------------------------------------------------------------------------------------------------------------------------------------------------------------------------------------------------------------------|------------------------------------------------------------------------------------------------------------|
| Participants                 | 6 | <p>(a) <i>Cohort study</i> - Give the eligibility criteria, and the sources and methods of selection of participants. Describe methods of follow-up</p> <p><i>Case-control study</i> - Give the eligibility criteria, and the sources and methods of case ascertainment and control selection. Give the rationale for the choice of cases and controls</p> <p><i>Cross-sectional study</i> - Give the eligibility criteria, and the sources and methods of selection of participants</p> <p>(b) <i>Cohort study</i> - For matched studies, give matching criteria and number of exposed and unexposed</p> <p><i>Case-control study</i> - For matched studies, give matching criteria and the number of controls per case</p> |  | <p>RECORD 6.1: The methods of study population selection (such as codes or algorithms used to identify subjects) should be listed in detail. If this is not possible, an explanation should be provided.</p> <p>RECORD 6.2: Any validation studies of the codes or algorithms used to select the population should be referenced. If validation was conducted for this study and not published elsewhere, detailed methods and results should be provided.</p> <p>RECORD 6.3: If the study involved linkage of databases, consider use of a flow diagram or other graphical display to demonstrate the data linkage process, including the number of individuals with linked data at each stage.</p> | <p>6.1: Methods (pp 6-7);<br/>Supplementary Material</p> <p>6.2: Methods (pp 6-7)</p> <p>6.3: Figure 1</p> |
| Variables                    | 7 | Clearly define all outcomes, exposures, predictors, potential confounders, and effect modifiers. Give diagnostic criteria, if applicable.                                                                                                                                                                                                                                                                                                                                                                                                                                                                                                                                                                                    |  | RECORD 7.1: A complete list of codes and algorithms used to classify exposures, outcomes, confounders, and effect modifiers should be provided. If these cannot be reported, an explanation should be provided.                                                                                                                                                                                                                                                                                                                                                                                                                                                                                      | 7.1: Methods (pp 6-7);<br>Supplementary Material                                                           |
| Data sources/<br>measurement | 8 | For each variable of interest, give sources of data and details of methods of assessment (measurement). Describe comparability of assessment methods if there is more than one group                                                                                                                                                                                                                                                                                                                                                                                                                                                                                                                                         |  |                                                                                                                                                                                                                                                                                                                                                                                                                                                                                                                                                                                                                                                                                                      | Methods (pp 6-7)                                                                                           |

|                                                                                                                                              |                                  |    |                                                                                                                                                                                                                                                                                                                                                                                                                                                                                                                                                                      |  |                                                                                                                                                       |                            |
|----------------------------------------------------------------------------------------------------------------------------------------------|----------------------------------|----|----------------------------------------------------------------------------------------------------------------------------------------------------------------------------------------------------------------------------------------------------------------------------------------------------------------------------------------------------------------------------------------------------------------------------------------------------------------------------------------------------------------------------------------------------------------------|--|-------------------------------------------------------------------------------------------------------------------------------------------------------|----------------------------|
| 1<br>2<br>3<br>4<br>5<br>6<br>7<br>8<br>9<br>10                                                                                              | Bias                             | 9  | Describe any efforts to address potential sources of bias                                                                                                                                                                                                                                                                                                                                                                                                                                                                                                            |  |                                                                                                                                                       | Discussion (pp 9, 11)      |
| 11<br>12<br>13<br>14<br>15<br>16<br>17<br>18<br>19<br>20<br>21<br>22<br>23<br>24<br>25<br>26<br>27<br>28<br>29<br>30<br>31<br>32<br>33<br>34 | Study size                       | 10 | Explain how the study size was arrived at                                                                                                                                                                                                                                                                                                                                                                                                                                                                                                                            |  |                                                                                                                                                       | Methods (page 6); Figure 1 |
| 35<br>36<br>37<br>38<br>39<br>40<br>41<br>42<br>43<br>44<br>45<br>46<br>47                                                                   | Quantitative variables           | 11 | Explain how quantitative variables were handled in the analyses. If applicable, describe which groupings were chosen, and why                                                                                                                                                                                                                                                                                                                                                                                                                                        |  |                                                                                                                                                       | Methods (pp 6-7)           |
|                                                                                                                                              | Statistical methods              | 12 | (a) Describe all statistical methods, including those used to control for confounding<br>(b) Describe any methods used to examine subgroups and interactions<br>(c) Explain how missing data were addressed<br>(d) <i>Cohort study</i> - If applicable, explain how loss to follow-up was addressed<br><i>Case-control study</i> - If applicable, explain how matching of cases and controls was addressed<br><i>Cross-sectional study</i> - If applicable, describe analytical methods taking account of sampling strategy<br>(e) Describe any sensitivity analyses |  |                                                                                                                                                       | Methods (pp 6-7)           |
|                                                                                                                                              | Data access and cleaning methods |    | ..                                                                                                                                                                                                                                                                                                                                                                                                                                                                                                                                                                   |  | RECORD 12.1: Authors should describe the extent to which the investigators had access to the database population used to create the study population. | 12.1-2: Methods            |

|                  |    |                                                                                                                                                                                                                                                                                                                                                 |  |                                                                                                                                                                                                                                                                                                                    |                               |
|------------------|----|-------------------------------------------------------------------------------------------------------------------------------------------------------------------------------------------------------------------------------------------------------------------------------------------------------------------------------------------------|--|--------------------------------------------------------------------------------------------------------------------------------------------------------------------------------------------------------------------------------------------------------------------------------------------------------------------|-------------------------------|
|                  |    |                                                                                                                                                                                                                                                                                                                                                 |  | RECORD 12.2: Authors should provide information on the data cleaning methods used in the study.                                                                                                                                                                                                                    |                               |
| Linkage          |    | ..                                                                                                                                                                                                                                                                                                                                              |  | RECORD 12.3: State whether the study included person-level, institutional-level, or other data linkage across two or more databases. The methods of linkage and methods of linkage quality evaluation should be provided.                                                                                          | Methods (page 5)              |
| <b>Results</b>   |    |                                                                                                                                                                                                                                                                                                                                                 |  |                                                                                                                                                                                                                                                                                                                    |                               |
| Participants     | 13 | (a) Report the numbers of individuals at each stage of the study ( <i>e.g.</i> , numbers potentially eligible, examined for eligibility, confirmed eligible, included in the study, completing follow-up, and analysed)<br>(b) Give reasons for non-participation at each stage.<br>(c) Consider use of a flow diagram                          |  | RECORD 13.1: Describe in detail the selection of the persons included in the study ( <i>i.e.</i> , study population selection) including filtering based on data quality, data availability and linkage. The selection of included persons can be described in the text and/or by means of the study flow diagram. | Results (page 8);<br>Figure 1 |
| Descriptive data | 14 | (a) Give characteristics of study participants ( <i>e.g.</i> , demographic, clinical, social) and information on exposures and potential confounders<br>(b) Indicate the number of participants with missing data for each variable of interest<br>(c) <i>Cohort study</i> - summarise follow-up time ( <i>e.g.</i> , average and total amount) |  |                                                                                                                                                                                                                                                                                                                    | Results (page 8)              |
| Outcome data     | 15 | <i>Cohort study</i> - Report numbers of outcome events or summary measures over time<br><i>Case-control study</i> - Report numbers in each exposure                                                                                                                                                                                             |  |                                                                                                                                                                                                                                                                                                                    | Results                       |

|                   |    |                                                                                                                                                                                                                                                                                                                                                                                                                 |  |                                                                                                                                                                                                                                                                                                          |                             |
|-------------------|----|-----------------------------------------------------------------------------------------------------------------------------------------------------------------------------------------------------------------------------------------------------------------------------------------------------------------------------------------------------------------------------------------------------------------|--|----------------------------------------------------------------------------------------------------------------------------------------------------------------------------------------------------------------------------------------------------------------------------------------------------------|-----------------------------|
|                   |    | category, or summary measures of exposure<br><i>Cross-sectional study</i> - Report numbers of outcome events or summary measures                                                                                                                                                                                                                                                                                |  |                                                                                                                                                                                                                                                                                                          |                             |
| Main results      | 16 | (a) Give unadjusted estimates and, if applicable, confounder-adjusted estimates and their precision (e.g., 95% confidence interval). Make clear which confounders were adjusted for and why they were included<br>(b) Report category boundaries when continuous variables were categorized<br>(c) If relevant, consider translating estimates of relative risk into absolute risk for a meaningful time period |  |                                                                                                                                                                                                                                                                                                          | NA                          |
| Other analyses    | 17 | Report other analyses done—e.g., analyses of subgroups and interactions, and sensitivity analyses                                                                                                                                                                                                                                                                                                               |  |                                                                                                                                                                                                                                                                                                          | NA                          |
| <b>Discussion</b> |    |                                                                                                                                                                                                                                                                                                                                                                                                                 |  |                                                                                                                                                                                                                                                                                                          |                             |
| Key results       | 18 | Summarise key results with reference to study objectives                                                                                                                                                                                                                                                                                                                                                        |  |                                                                                                                                                                                                                                                                                                          | Discussion: Page 9          |
| Limitations       | 19 | Discuss limitations of the study, taking into account sources of potential bias or imprecision. Discuss both direction and magnitude of any potential bias                                                                                                                                                                                                                                                      |  | RECORD 19.1: Discuss the implications of using data that were not created or collected to answer the specific research question(s). Include discussion of misclassification bias, unmeasured confounding, missing data, and changing eligibility over time, as they pertain to the study being reported. | Discussion: Page 9, Page 11 |
| Interpretation    | 20 | Give a cautious overall interpretation of results considering objectives,                                                                                                                                                                                                                                                                                                                                       |  |                                                                                                                                                                                                                                                                                                          | Conclusion (Page 11)        |

|                                                           |    |                                                                                                                                                               |  |                                                                                                                                                          |                      |
|-----------------------------------------------------------|----|---------------------------------------------------------------------------------------------------------------------------------------------------------------|--|----------------------------------------------------------------------------------------------------------------------------------------------------------|----------------------|
|                                                           |    | limitations, multiplicity of analyses, results from similar studies, and other relevant evidence                                                              |  |                                                                                                                                                          |                      |
| Generalisability                                          | 21 | Discuss the generalisability (external validity) of the study results                                                                                         |  |                                                                                                                                                          | Limitations (Page 9) |
| <b>Other Information</b>                                  |    |                                                                                                                                                               |  |                                                                                                                                                          |                      |
| Funding                                                   | 22 | Give the source of funding and the role of the funders for the present study and, if applicable, for the original study on which the present article is based |  |                                                                                                                                                          | Funding (Page 12)    |
| Accessibility of protocol, raw data, and programming code |    | ..                                                                                                                                                            |  | RECORD 22.1: Authors should provide information on how to access any supplemental information such as the study protocol, raw data, or programming code. | Page 12              |

\*Reference: Benchimol EI, Smeeth L, Guttman A, Harron K, Moher D, Petersen I, Sørensen HT, von Elm E, Langan SM, the RECORD Working Committee. The REporting of studies Conducted using Observational Routinely-collected health Data (RECORD) Statement. *PLoS Medicine* 2015; in press.

\*Checklist is protected under Creative Commons Attribution ([CC BY](https://creativecommons.org/licenses/by/4.0/)) license.

# BMJ Open

## Development of a computable phenotype to identify a transgender sample for health research purposes: A feasibility study in a large linked provincial healthcare administrative cohort in British Columbia, Canada

|                                 |                                                                                                                                                                                                                                                                                                                                                                                                                                                                                                                                                                                     |
|---------------------------------|-------------------------------------------------------------------------------------------------------------------------------------------------------------------------------------------------------------------------------------------------------------------------------------------------------------------------------------------------------------------------------------------------------------------------------------------------------------------------------------------------------------------------------------------------------------------------------------|
| Journal:                        | <i>BMJ Open</i>                                                                                                                                                                                                                                                                                                                                                                                                                                                                                                                                                                     |
| Manuscript ID                   | bmjopen-2020-040928.R1                                                                                                                                                                                                                                                                                                                                                                                                                                                                                                                                                              |
| Article Type:                   | Original research                                                                                                                                                                                                                                                                                                                                                                                                                                                                                                                                                                   |
| Date Submitted by the Author:   | 09-Nov-2020                                                                                                                                                                                                                                                                                                                                                                                                                                                                                                                                                                         |
| Complete List of Authors:       | Rich, Ashleigh; The University of British Columbia, School of Population & Public Health; BC Centre for Excellence in HIV/AIDS, Poteat, Tonia; University of North Carolina at Chapel Hill, Department of Social Medicine<br>Koehoorn, Mieke; University of British Columbia, School of Population and Public Health;<br>Li, Jenny; BC Centre for Excellence in HIV/AIDS,<br>Ye, Monica; BC Centre for Excellence in HIV/AIDS,<br>Sereda, Paul; British Columbia Centre for Excellence in HIV/AIDS,<br>Salway, Travis; Simon Fraser University<br>Hogg, R; Simon Fraser University, |
| <b>Primary Subject Heading</b>: | Epidemiology                                                                                                                                                                                                                                                                                                                                                                                                                                                                                                                                                                        |
| Secondary Subject Heading:      | HIV/AIDS, Health services research, Research methods, Public health                                                                                                                                                                                                                                                                                                                                                                                                                                                                                                                 |
| Keywords:                       | EPIDEMIOLOGY, PUBLIC HEALTH, Sexual and gender disorders < PSYCHIATRY, HIV & AIDS < INFECTIOUS DISEASES, SOCIAL MEDICINE                                                                                                                                                                                                                                                                                                                                                                                                                                                            |
|                                 |                                                                                                                                                                                                                                                                                                                                                                                                                                                                                                                                                                                     |

SCHOLARONE™  
Manuscripts



I, the Submitting Author has the right to grant and does grant on behalf of all authors of the Work (as defined in the below author licence), an exclusive licence and/or a non-exclusive licence for contributions from authors who are: i) UK Crown employees; ii) where BMJ has agreed a CC-BY licence shall apply, and/or iii) in accordance with the terms applicable for US Federal Government officers or employees acting as part of their official duties; on a worldwide, perpetual, irrevocable, royalty-free basis to BMJ Publishing Group Ltd ("BMJ") its licensees and where the relevant Journal is co-owned by BMJ to the co-owners of the Journal, to publish the Work in this journal and any other BMJ products and to exploit all rights, as set out in our [licence](#).

The Submitting Author accepts and understands that any supply made under these terms is made by BMJ to the Submitting Author unless you are acting as an employee on behalf of your employer or a postgraduate student of an affiliated institution which is paying any applicable article publishing charge ("APC") for Open Access articles. Where the Submitting Author wishes to make the Work available on an Open Access basis (and intends to pay the relevant APC), the terms of reuse of such Open Access shall be governed by a Creative Commons licence – details of these licences and which [Creative Commons](#) licence will apply to this Work are set out in our licence referred to above.

Other than as permitted in any relevant BMJ Author's Self Archiving Policies, I confirm this Work has not been accepted for publication elsewhere, is not being considered for publication elsewhere and does not duplicate material already published. I confirm all authors consent to publication of this Work and authorise the granting of this licence.

1  
2  
3 **1 TITLE PAGE**  
4 2

5 3 **Title:** Development of a computable phenotype to identify a transgender sample for health  
6 4 research purposes: A feasibility study in a large linked provincial healthcare  
7 5 administrative cohort in British Columbia, Canada  
8 6

9 7 **Authors:** Rich AJ<sup>1,2</sup>, Poteat T<sup>3</sup>, Koehoorn M<sup>1</sup>, Li J<sup>2</sup>, Ye M<sup>2</sup>, Sereda, P<sup>2</sup>, Salway T<sup>4</sup>, Hogg RS<sup>2,4</sup>  
10 8  
11 9

12 **Affiliations:**

- 13 10 1. School of Population and Public Health, University of British Columbia, Vancouver, Canada  
14 11 2. British Columbia Centre for Excellence in HIV/AIDS, Vancouver, Canada  
15 12 3. Department of Social Medicine, University of North Carolina- Chapel Hill, Chapel Hill, USA  
16 13 4. Faculty of Health Sciences, Simon Fraser University, Burnaby, Canada  
17 14

18 15 **Corresponding author:**

19 16 Ashleigh J Rich  
20 17 [ajrich@mail.ubc.ca](mailto:ajrich@mail.ubc.ca)  
21 18

22 19 2206 East Mall  
23 20 Vancouver, BC  
24 21 V6T 1Z3  
25 22 Canada  
26 23

27 24 **Word count:** 4000/4000  
28 25  
29 26  
30 27  
31 28  
32  
33  
34  
35  
36  
37  
38  
39  
40  
41  
42  
43  
44  
45  
46  
47  
48  
49  
50  
51  
52  
53  
54  
55  
56  
57  
58  
59  
60



## 1 ABSTRACT

2  
3  
4  
5  
6  
7  
8  
9  
10  
11  
12  
13  
14  
15  
16  
17  
18  
19  
20  
21  
22  
23  
24  
25  
26  
27  
28  
29  
30  
31  
32  
33  
34  
35  
36  
37  
38  
39  
40  
41  
42  
43  
44  
45  
46  
47  
48  
49  
50  
51  
52  
53  
54  
55  
56  
57  
58  
59  
60

**Objectives:** Innovative methods are needed for identification of transgender people in administrative records for health research purposes. This study investigated the feasibility of using transgender-specific healthcare utilization in a Canadian population-based, health records database to develop a computable phenotype (CP) and identify the proportion of transgender people within the HIV-positive population as a public health priority.

**Design:** The COAST cohort comprises a data linkage between two provincial data sources: The BC Centre for Excellence in HIV/AIDS Drug Treatment Program, which coordinates HIV treatment dispensation across BC; and Population Data BC, a provincial data repository holding individual, longitudinal data for all BC residents (1996-2013).

**Setting:** British Columbia, Canada.

**Participants:** COAST participants include 13 907 BC residents living with HIV ( $\geq 19$  years of age) and a 10% random sample comparison group of the HIV-negative general population (514 952 individuals).

**Primary and secondary outcome measures:** Healthcare records were used to identify transgender people via a CP algorithm (diagnosis codes + androgen blocker/hormone prescriptions), to examine related diagnoses and prescription concordance, and to validate the CP using an independent provider-report transgender status measure. Demographics and chronic illness burden were also characterized for the transgender sample.

**Results:** The best-performing CP identified 137 HIV-negative and 51 HIV-positive transgender people (total 188). In validity analyses, the best-performing CP had low sensitivity (27.5%, 95%CI:17.8-39.8), high specificity (99.8%, 95%CI:99.6-99.8), low agreement using Kappa statistics (0.3, 95%CI:0.2-0.5), and moderate positive predictive value (43.2%, 95%CI:28.7-58.9). There was high concordance between exogenous-sex hormone use and transgender-specific diagnoses.

**Conclusions:** The development of a validated CP opens up new opportunities for identifying transgender people for inclusion in population-based health research using administrative health data, and offers the potential for much-needed and heretofore unavailable evidence on health status, including HIV status, and the healthcare use and needs of transgender people.

**KEYWORDS:** Transgender Persons, Health Services, Algorithms, Canada

## ARTICLE SUMMARY

### Strengths and limitations of this study:

- This study demonstrates the feasibility of developing and validating a computable phenotype for identification of a transgender sample, using a population-based representative source population and healthcare records.
- A major contribution of this study is the ascertainment of the population of transgender people living with HIV in the Canadian province of British Columbia, in a universal

1  
2  
3 1 healthcare setting, using a computable phenotype, and capacity to estimate the prevalence  
4 2 of transgender status among the population living with HIV in the province.

- 5  
6 3 • Development of a validated transgender computable phenotype algorithm lays the  
7 4 foundation for future investigation of transgender-specific research questions related to  
8 5 general and HIV-specific healthcare use and health outcomes for this key population.  
9 6

10  
11  
12  
13  
14  
15  
16  
17  
18  
19  
20  
21  
22  
23  
24  
25  
26  
27  
28  
29  
30  
31  
32  
33  
34  
35  
36  
37  
38  
39  
40  
41  
42  
43  
44  
45  
46  
47  
48  
49  
50  
51  
52  
53  
54  
55  
56  
57  
58  
59  
60

For peer review only

## 1 INTRODUCTION

### 2 Limited data on transgender people

3 Transgender people are often overlooked within epidemiological research and population health  
4 surveillance due to small sample size, limited research designs, and other institutional and  
5 methodological erasures.[1–3] A 2017 review of Medline-indexed literature from 1950 to 2016  
6 found 2405 published articles including transgender people, with almost half published in the last  
7 decade.[4] A 2008 United States (US)-based meta-analysis of HIV prevalence among  
8 transgender populations found 24 studies of transgender women, and five additional studies of  
9 transgender men,[5] though an updated review found 43 primary studies on transgender women  
10 and 15 on transgender men published between 2006-2017.[6] Despite this recent increase in  
11 transgender health research in general and for HIV specifically, much of the literature has  
12 focused on transgender-specific care, mental health and HIV/sexual health,[7,8] leaving the  
13 population understudied, in particular in the broader areas of physical health and healthcare  
14 utilization.

15  
16 The erasures or exclusions of transgender persons in health studies may be explained, in part, by  
17 methodological challenges. Specific to electronic health record (EHR) data, a 2017 report  
18 identified only one transgender person among 38,5820 cancer cases in a Minnesota cancer  
19 registry,[9] clearly an undercount given that 0.4% of the US general population and 0.6% (95%  
20 credibility intervals: 0.5%-0.7%) of the Minnesota population is estimated to be  
21 transgender.[10,11] This highlights the need for improved gender ascertainment and transgender  
22 inclusion in research relying on patient records and administrative data. The establishment of  
23 best practices for measuring transgender status in survey research, such as the two-step method  
24 (measuring sex assigned at birth and current gender identity), points to a way forward for  
25 transgender-inclusive population health research.[12,13] However, innovative research methods  
26 are needed to identify transgender people in studies that rely on existing data sources (in  
27 particular EHR) and that optimize the use of transgender respondents' data in non-transgender  
28 specific research.

### 29 Computable phenotypes for transgender health research

30 Previous research in transgender health largely comprises cross-sectional studies, case reports,  
31 and qualitative or observational research.[7] Much consists of clinic- or venue-based  
32 convenience samples or lack comparison groups.[7,8] The literature is further characterized by  
33 inconsistent transgender status measurement,[14] small sample sizes, and focus on the United  
34 States (US).[8] In response, researchers have called for advancing transgender health research  
35 methods - namely ascertainment of high-quality samples via systematic approaches - including  
36 for general population-based and health systems-based studies.[15] One opportunity for the  
37 advancement of transgender health research methods is the emerging use of computable  
38 phenotypes (CPs)[16] or case ascertainment algorithms, to identify transgender samples in  
39 healthcare utilization data. A computable phenotype is an algorithm for identifying a clinical  
40 feature, condition, or set of characteristics that can be determined directly from EHR and other  
41 ancillary health care data systems (e.g., disease registries, insurance claims data) data.[17] CPs  
42 are developed using a combination of data elements (e.g., sociodemographic variables, clinical  
43 diagnoses) and value sets (i.e., the selection of a set of relevant values for each data element).  
44 Development of CPs using standardized methods and definitions enables identification and  
45 inclusion of transgender persons in research, as well as replication of analyses across data  
46

1 sources, healthcare organizations/sites and studies. CPs have application in clinical care,  
2 surveillance, and health research.

3  
4  
5  
6  
7 4 Recently, CP and other EHR-based algorithm methods have been applied in a number of settings  
8 primarily in the US to identify transgender samples for health research.[14] Specifically, the  
9 STRONG study identified a transgender cohort (n = 6,456) using EHR data from Kaiser  
10 Permanente health plan members in California and Georgia, for investigation of general and  
11 transgender-specific health outcomes.[18] Blosnich et al identified 3,177 people with a “gender  
12 identity disorder” diagnosis among military veterans accessing care through the US Veterans  
13 Health Administration healthcare system,[19] for examination of mental health and other  
14 outcomes. Researchers with the US Centers for Medicare & Medicaid Services identified 4,098  
15 transgender beneficiaries using national Medicare claims data,[20] and researchers at Vanderbilt  
16 University identified 234 transgender patients in their university clinic EHR data.[16] While  
17 these cohorts represent important opportunities for advancement of transgender health research,  
18 these methods have yet to be applied widely outside the US context. This is particularly  
19 important as different jurisdictions may vary in medical billing and coding practices, healthcare  
20 system patient populations, and representativeness of the general population. Specifically, in  
21 Canada, healthcare is delivered through a provincially administered universal healthcare system.  
22 As such, research using EHR provides an opportunity to develop methods for population-based,  
23 representative estimates of transgender populations within the Canadian context. Coupled with  
24 the current absence of gender ascertainment measures in population-based routinely collected  
25 data (e.g., census, national government health surveys, etc.) in Canada and many other  
26 jurisdictions, this remains an evidence need.

### 27 **Summary of study rationale**

28 This study investigated the application of emerging transgender health research methods,  
29 specifically CPs, in a Canadian context for the first time, testing the feasibility of identification  
30 of a transgender sample using EHR data from a provincial healthcare administrative data-linked  
31 cohort.

## 32 **METHODS**

### 33 **Data Sources and Participants**

34 The Comparative Outcomes and Service Utilization Trends Study (COAST)  
35 COAST is a population-based cohort study focused on health services utilization research  
36 questions among all people known to be living with HIV (PLWH) in the province of British  
37 Columbia (BC) and a 10% random sample comparison group of the HIV-negative general  
38 population.[21] The COAST cohort comprises individual-level, longitudinal data from PLWH  
39 who have ever accessed HIV treatment in BC between 1996 and 2013, provided by Population  
40 Data BC (PopDataBC)[21] via data linkage between two provincial data sources, by personal  
41 health number: the Drug Treatment Program (DTP) [22] and the Ministry of Health. PopDataBC  
42 provides infrastructure for access to, and linkage of, longitudinal and individual-level  
43 administrative health data for all BC residents.[23]. The HIV-negative general population cohort  
44 was drawn randomly from the Ministry of Health registry data by PopDataBC. The COAST study  
45 has received approval from the University of British Columbia/Providence Health Care  
46 Research Ethics Board (#H09-02905) and Simon Fraser University Office of Research Ethics  
47 (#2013 s0566). The study complies with the BC Freedom of Information and Protection of

1  
2  
3 1 Privacy Act (FIPPA) and did not require informed consent as it is conducted using  
4 2 retrospective administrative and anonymized data for research and statistical purposes  
5 3 only. No patients or public were involved in this study.  
6 4

#### 5 Drug Treatment Program

6 In BC, antiretroviral therapy (ART) is provided to PLWH at no cost to the patient, and distributed  
7 through the DTP.[22] The DTP contributed a provider-reported measure of transgender status for  
8 COAST.  
9

#### 10 Ministry of Health

11 Ministry of Health data available via COAST included insured medical service billing records for  
12 outpatient visits,[24,25] hospital (in-patient) visits,[26] prescription medications,[27,28] and vital  
13 statistics.[29]  
14

### 15 **Measures & Analyses**

#### 16 Transgender computable phenotypes

17 Identification of transgender cases was tested in COAST using International Classification of  
18 Disease (ICD) codes (9<sup>th</sup> and 10<sup>th</sup> editions) and exogenous sex hormone prescription use.

19 Transgender-specific diagnoses in medical and hospital billing records included the ICD-9 codes  
20 302.5 Trans-sexualism with unspecified history, 302.51 Trans-sexualism with asexual history,  
21 302.52 Trans-sexualism with homosexual history, 302.53 Trans-sexualism with heterosexual  
22 history, 302.6 Gender Identity Disorder in children, 302.85 Gender Identity Disorder in  
23 adolescents or adults; and ICD-10 codes F64.0 Gender Identity Disorder of childhood, F64.2  
24 Gender Identity Disorder of childhood, F64.8 Other Gender Identity Disorder, and F64.9 Gender  
25 Identity Disorder unspecified. The full list of androgen blockers and exogenous sex hormone  
26 prescriptions included in analyses is available in the supplementary material.  
27

#### 28 Concordance

29 To assess face validity and utility of diagnosis and prescription data over time in CP  
30 development (i.e. whether the identified transgender sample had exogenous sex hormone  
31 prescription use and other diagnoses patterns consistent with that of transgender populations in  
32 other studies), concordance analyses evaluated the presence of at least one included diagnosis  
33 and prescription during the COAST study follow-up period with the presence of at least one  
34 included diagnosis and prescription in the last study year. Concordance was assessed between  
35 transgender-specific diagnoses, exogenous sex hormone and androgen blocker prescriptions, and  
36 non-transgender specific diagnoses (ICD-9 259.9 Unspecified Endocrine Disorder and ICD-10  
37 E34.9 Endocrine Disorder, Unspecified [see supplementary material]). Endocrine disorder  
38 diagnosis codes are sometimes preferred by medical providers treating transgender people in  
39 response to historic exclusions of transgender-specific care from insurance coverage and to  
40 combat the stigma of transgender-specific diagnosis codes that have historically been classified  
41 as psychiatric disorders in the Diagnostic and Statistical Manual of Mental Disorders (DSM).[30]  
42 Exogenous sex hormone use, while common in transgender populations,[5,31] is not  
43 transgender-specific. Cisgender populations also use androgen blocker and sex hormone  
44 prescriptions (e.g. estrogen to treat menopausal symptoms in cisgender women, spironolactone is  
45 used for hypertension), thus exogenous sex hormone and androgen blocker prescription use  
56  
57  
58  
59  
60

cannot independently identify transgender people. At the same time, not all transgender people use hormones and some access via non-medical sources.[32,33]

#### Validation

In British Columbia, transgender status is collected in the DTP via a provider-reported sex variable (“Male”, “Male to Female”, “Female to Male”, or “Female”). Patients reported as either “Male to Female” or “Female to Male” were classified as transgender. The provider-reported transgender measure, available for the HIV positive cohort only, was used as a ‘gold standard’ for CP validation. Sensitivity, specificity, positive predictive value and kappa statistics with corresponding 95% confidence intervals (CI) were calculated for identifying transgender people via the CPs, in the HIV positive cohort only.

#### Demographics and chronic conditions

To further assess face validity of the transgender CP for future health research, descriptive statistics were calculated for the total transgender sample (both HIV-positive and HIV-negative) using the COAST study key sociodemographic and health variables, specifically laboratory confirmed HIV serostatus (HIV-positive/HIV-negative), baseline age, patient’s Health Authority (five provincial regions for the administration of health services that include large urban centres, suburban regions, and rural/remote areas), and chronic illness burden based on standardized case definitions from the BC Ministry of Health [34] and the BC Cancer Agency.[35]

## RESULTS

The total COAST cohort included 528 859 people, of which 514 952 were HIV-negative (10% general population random sample) and 13 907 were PLWH (Figure 1).

*[Figure 1 here]*

#### Concordance

Of the 237 people who had ever had a transgender-specific diagnosis during the study period, 19.4% also had a recent diagnosis in the last follow-up year (Table 1). None had an unspecified endocrine disorder diagnosis at any time, thus this diagnosis was excluded from all CPs. Of the 237, 79.3% had an exogenous sex hormone or androgen blocker prescription at least once during the study period and 46.4% had one in the last year.

**Table 1. Concordance analyses for diagnoses and hormone measures**

|                                            | N   | %    |
|--------------------------------------------|-----|------|
| ≥ Transgender ICD- ever                    | 237 | 100  |
| ≥ Transgender ICD- recent                  | 46  | 19.4 |
| Unspecified endocrine disorder use- ever   | 0   | 0.0  |
| Unspecified endocrine disorder use- recent | 0   | 0.0  |
| ≥ Hormone/blocker use- ever                | 188 | 79.3 |
| ≥ Hormone/blocker use-recent               | 110 | 46.4 |

#### Validation

While no one CP consistently performed well across all validation metrics, the CP with the best overall performance across test statistics was based on having received at least one transgender-

specific diagnosis and at least one androgen blocker/exogenous sex hormone prescription over the study follow-up period (Table 2). This CP had high specificity (99.8%, 95% CI: 99.6-99.8), low sensitivity (27.5%, 95% CI: 17.8-39.8), low to moderate Kappa coefficients (0.3, 95% CI: 0.2-0.5) and moderate positive predictive values (43.2%, 95% CI: 28.7-58.9).

**Table 2. Validation measures of transgender computable phenotype (CP) with provider-report transgender status measures, in COAST HIV-positive cohort**

| CP                                                      | Sensitivity (95% CI) | Specificity (95% CI) | PPV (95% CI)      | Kappa (95% CI) |
|---------------------------------------------------------|----------------------|----------------------|-------------------|----------------|
| ≥ 1 transgender ICD- ever                               | 27.5 (17.8, 39.8)    | 99.7 (99.6, 99.8)    | 40.4 (26.7, 55.7) | 0.3 (0.2, 0.4) |
| ≥ 1 transgender ICD- recent                             | 8.7 (3.6, 18.6)      | 100.0 (99.9, 100.0)  | 85.7 (42.0, 99.4) | 0.2 (0.1, 0.3) |
| ≥ 1 transgender ICD AND ≥ 1 hormone/blocker use- ever   | 27.5 (17.8, 39.8)    | 99.8 (99.6, 99.8)    | 43.2 (28.7, 58.9) | 0.3 (0.2, 0.5) |
| ≥ 1 transgender ICD AND ≥ 1 hormone/blocker use- recent | 7.3 (2.7, 16.8)      | 100.0 (99.9, 100.0)  | 83.3 (36.5, 99.1) | 0.1 (0.0, 0.2) |

### Transgender phenotype

Applying the best-performing CP, 137 HIV-negative people and 51 HIV-positive people (188 total) were identified as transgender in the respective COAST cohorts (Figure 1).

### Demographics and chronic conditions

Demographic characteristics and chronic conditions for the 188 transgender people identified via the best-performing CP are presented in Figures 2 to 4. Transgender people were geographical located throughout BC health regions. The Vancouver Coastal Health Authority region, which includes the largest municipal area in BC, had the highest concentration of transgender people (44.2%) while the Northern Health Authority region - a predominantly rural and remote area of the province - had the lowest (1.6%).<sup>[36]</sup> The HIV-positive group had a higher median age than the HIV-negative group (35 [Q1, Q3: 30,42] and 30 [Q1, Q3: 19,42], respectively). For the HIV-negative sample, the largest proportion of transgender people were aged 19 to 29 years (44.5%) and the smallest proportion aged 55 years and older (<3%). For the HIV-positive sample, the largest proportion were aged 30 to 34 years (25.5%) and the smallest proportion aged 55 years and older (<2%).

*[Figures 2 and 3 here]*

Overall, HIV-positive transgender people had a higher prevalence of at least one chronic condition (other than HIV) compared to HIV-negative transgender people (88.2% versus 85.4%, respectively), and of two or more chronic conditions (76.5% versus 52.6%, respectively). Specific chronic disease differences between transgender people living with and without HIV were most notable for a higher prevalence among the HIV-positive cohort of cardiovascular

1  
2  
3 1 disease, chronic kidney disease, osteoarthritis, schizophrenia and personality disorders, and  
4 2 chronic liver disease, but a lower prevalence for hypertension.  
5 3

6 4 *[Figure 4 here]*  
7 5

## 6 6 **DISCUSSION**

7 7 This study demonstrates the feasibility of identification of a sample of transgender people in a  
8 8 large linked provincial healthcare administrative database, using a CP based on prescriptions and  
9 9 diagnoses. Among a growing number of studies using EHR and CP methods to identify  
10 10 transgender samples for health research purposes, this is the first to do so in Canada., to  
11 11 independently validate the CP using a ‘gold standard’ of provider-reported transgender status,  
12 12 and the only to use population-based data.  
13 13

### 14 14 **Concordance**

15 15 There was high concordance between transgender-specific diagnoses and exogenous sex  
16 16 hormone or androgen blocker prescription use in this study. That nearly half of those with at  
17 17 least one transgender-specific diagnosis had been dispensed hormones or blockers in the past  
18 18 year is consistent with findings from US and Canadian studies (48.9% and 43.0%,  
19 19 respectively)[20,32,33] - suggesting face validity for the current CP.  
20 20

### 21 21 **CP development and validation**

22 22 The best-performing CP overall successfully identified cisgender people who were truly  
23 23 cisgender (specificity) and correctly identified transgender people who were truly transgender  
24 24 (0.2% false positive rate, results not shown). However, the selected CP had relatively low  
25 25 sensitivity, missing approximately 72.5% of ‘true’ transgender people in COAST, as identified  
26 26 by the gold standard provider-based measure. Though a relatively small proportion of the ‘true’  
27 27 transgender sample was identified in this study, the impact on future analyses comparing health  
28 28 outcomes for transgender and cisgender groups is likely negligible, as even the large proportion  
29 29 of ‘true’ transgender people misclassified as cisgender (approximate n=496) is a very small  
30 30 proportion of the total COAST sample. At worst, this misclassification would bias results related  
31 31 to disparities between transgender and cisgender health toward the null, producing a conservative  
32 32 attenuated effect. Further, as discussed below, gender identity classification will likely greatly  
33 33 improve as transgender care shifts further into the fee-for-service system in BC. As in other  
34 34 Canadian administrative data studies, low sensitivity may be explained in part by provider and  
35 35 system billing preferences using 3-digit ICD diagnosis coding instead of the more specific 4-  
36 36 digit coding, and inconsistencies in the BC billing management system.[37] Despite the low  
37 37 sensitivity, CP development in this study with high specificity offers an advancement for  
38 38 transgender health research. A measure that correctly identifies cases for transgender samples in  
39 39 research with good success translates to better opportunities to include transgender people in  
40 40 health studies and to investigate their health relative to other groups. While future research may  
41 41 lead to improvements in CP development, the CP identified in the current study with good  
42 42 specificity, albeit relatively poor sensitivity, has important utility in advancing opportunities in  
43 43 transgender health research.  
44 44

45 45 The limited agreement between the CP and provider-report transgender status may be due to the  
46 46 widely varying transgender status prevalence depending on study design and ascertainment  
47 47  
48 48  
49 49  
50 50  
51 51  
52 52  
53 53  
54 54  
55 55  
56 56  
57 57  
58 58  
59 59  
60 60



1  
2  
3 1 measures used.[14] In the BC context, the CP and the DTP measures are assessing transgender  
4 2 status in different ways and for different purposes. In the DTP, transgender status is ascertained  
5 3 in the context of HIV diagnosis and ART prescribing, during which demographics and HIV  
6 4 transmission risk factors are recorded. This differs from recording diagnoses in EHR for those  
7 5 accessing transgender-specific care as utilized in the CP. This may explain the lower PPV for the  
8 6 best-performing CP compared to the CP based on recent transgender diagnoses, suggesting the  
9 7 DTP provider-reported transgender status measure has better coverage for recent cases and the  
10 8 potential for use of recent diagnosis over ever to be beneficial in future CP development.  
11 9 Ultimately, a single CP may not be sufficient for all intended purposes and the best applicable  
12 10 CP (using different types of diagnoses, prescriptions or procedures) may differ depending on the  
13 11 intended healthcare, health research, or health policy application.[17]

14 12  
15 13 There is limited literature on EHR-based studies with the ability to validate an administrative  
16 14 transgender measure using a ‘gold standard’ comparison measure.[16] The two previous studies  
17 15 that have developed and validated algorithms to identify transgender individuals have both been  
18 16 conducted in non-representative samples in the US, one using Medicare data[38] and one in a  
19 17 university medical center.[16] Similar to the current study, the Medicare study found high  
20 18 specificity when comparing an EHR-based and a two-step survey-based transgender measure.  
21 19 However, the Medicare study found that the EHR measure performed consistently well with high  
22 20 sensitivity and a high Kappa statistic, unlike in the current study. Using chart review as the ‘gold  
23 21 standard’ for comparison of transgender status, Ehrenfeld et al. found a low false positive rate for  
24 22 their best-performing algorithm (3%), though not as low as the false positive rate in the current  
25 23 study. The overall high levels of agreement for transgender measures in the two previous studies  
26 24 is likely a function of the lack of independence between the ‘gold standard’ and the CP or  
27 25 algorithm measures. Specifically, only those classified as transgender in the Medicare EHR data  
28 26 were offered survey participation to complete the two-step ‘gold standard’ survey measure, and  
29 27 only those cases identified as transgender in the university clinic EHR were included in chart  
30 28 review. Thus, previous studies could assess agreement between the two measures, but not  
31 29 robustly validate either. In the current study, the DTP provider-based transgender status measure  
32 30 is independent and thus could be used for robust CP validation.

33 31  
34 32 While not possible to incorporate free-text records in case-finding algorithms in the current study  
35 33 as only structured EHR data is linked through COAST, it is worth noting the opportunities  
36 34 potentiated by use of NLP and machine learning approaches as methods for identifying  
37 35 transgender samples in EHR data as this research area continues to grow. Outside of transgender  
38 36 health, the use of NLP and machine learning to mine unstructured free-text EHR data has  
39 37 demonstrated efficiency in improving case ascertainment algorithm accuracy .[39] As ‘gold  
40 38 standard’ two-step sex assigned at birth and current gender identity measures of transgender  
41 39 status[12] are slowly being implemented in routinely collected healthcare data sources, in the  
42 40 meantime NLPs to extract free-text data can be used to produce better gold standards against  
43 41 which to measure algorithm performance, as demonstrated by the Medicare study.[38]

### 44 42 **Transgender status prevalence & ascertainment**

45 43 Based on a recent meta-analysis of transgender status prevalence in population-based probability  
46 44 samples,[10] it was expected that an effective CP would identify 0.4% of the general population  
47 45 as transgender, or approximately 54 of the HIV-positive COAST cohort (n=13 907) and 3,098 of  
48 46  
49 47  
50 48  
51 49  
52 50  
53 51  
54 52  
55 53  
56 54  
57 55  
58 56  
59 57  
60 58

1  
2  
3 1 the HIV-negative cohort (n=516 340). Consistent with expectations, the best-performing CP  
4 2 identified 51 PLWH as transgender, equivalent to a transgender status prevalence of 0.4% among  
5 3 PLWH. Contrary to expectations, the best-performing CP identified less than 5% of the number  
6 4 of transgender persons expected in the HIV-negative cohort. This is likely a result of a number of  
7 5 factors including the limitation of CPs to the subset of a population accessing care as noted, and  
8 6 the result of most transgender people in BC receiving care currently outside the main fee-for-  
9 7 service healthcare delivery system. However, it is also consistent with the undercount of  
10 8 transgender populations using diagnostic criteria compared to other methods of ascertainment  
11 9 demonstrated in other studies.[14]  
12  
13

14 10  
15 11 Using the broadest CP algorithm (any transgender-specific diagnosis ever, n=56) and those  
16 12 identified by provider-report together (total n=106), the total transgender PLWH sample would  
17 13 represent as high as 0.88% (range: 0.73-1.1%) of the prevalent HIV infections in BC in  
18 14 2014.[40] This overrepresentation of transgender people among PLWH is consistent with  
19 15 evidence of a disproportionate HIV burden for transgender populations globally,[5,41,42] as well  
20 16 as in line with the only other available data on the proportion of PLWH who are transgender,  
21 17 from US national surveillance data (2012 data: 1.1%, 95%CI: 0.8-1.4).[43]  
22  
23

### 24 19 **Demographics and chronic conditions**

25 20 Despite moderate to low performance by some validation metrics, particularly low sensitivity,  
26 21 the CP was able to detect meaningful results in the characterization of demographics and chronic  
27 22 condition burden for the transgender sample - supporting CP face validity. The population  
28 23 density and age distribution by HIV-status of transgender people in this study is largely  
29 24 consistent with general population patterns, as well as the larger COAST cohort.[21,36] The  
30 25 overall higher burden of chronic illness for transgender people living with HIV versus without  
31 26 HIV in this study is consistent with elevated chronic illness risk and morbidity among non-  
32 27 transgender PLWH.[44] This higher chronic disease burden is linked to HIV disease processes  
33 28 and related inflammatory immune response.[45] While a small but growing number of studies  
34 29 have begun to investigate the chronic illness burden for transgender populations in other  
35 30 industrialized settings,[16,19,46–48] including using EHR data, findings vary widely due to  
36 31 differences in sampling, study design, setting and measurement.  
37  
38  
39

### 40 33 **Limitations**

41 34 Findings from this study should be interpreted in the context of a few key limitations. CPs are by  
42 35 design only applicable to people accessing healthcare services, often motivated by illness and  
43 36 aided by the ability to access care. As such, this study is limited to those transgender people  
44 37 accessing medical transition care in BC and may only represent 24% to 47% of the total  
45 38 transgender population.[33] This study was also limited by the inability to validate the  
46 39 transgender CP among the HIV-negative COAST cohort, as a 'gold standard' provider-based  
47 40 transgender measure was only available for the HIV-positive cohort. It is possible that the  
48 41 transgender CPs would perform differently in populations living without HIV, particularly as  
49 42 healthcare contact is higher among populations living with HIV. Additionally, this study should  
50 43 be considered in light of the context in which it was conducted, an environment in which  
51 44 transgender healthcare delivery in BC is currently shifting from specialized care settings to the  
52 45 main primary care fee-for-service settings. Given that COAST only includes fee-for-service data,  
53 46 this study was limited by the inability to capture transgender people who access transgender care  
54  
55  
56  
57  
58  
59  
60

1  
2  
3 1 outside the fee-for-service system. However, fortunately, as the shift to the fee-for-service  
4 2 system occurs, transgender ascertainment via CPs in BC will likely improve. The administrative  
5 3 data used in this study may also be susceptible to coding error (and coding biases/practices)  
6 4 across conditions and settings,[49] potentially introducing misclassification bias in terms of  
7 5 transgender ascertainment. Finally, chronic condition prevalence data reported in this study  
8 6 should be interpreted with caution, given potential selection bias by serostatus in the COAST  
9 7 cohort; though any such bias likely resulted in conservative estimates of difference by serostatus  
10 8 in this analysis.  
11 9

## 10 CONCLUSION

11 This study makes a number of important contributions to the literature on innovative methods in  
12 12 transgender health. Major contributions include development and validation of a transgender CP,  
13 13 using a population-based representative source population, in the Canadian context. Another  
14 14 strength is the approximately complete ascertainment of the population of transgender PLWH in  
15 15 BC, and capacity to estimate transgender status prevalence among PLWH. In a current funding  
16 16 environment of limited support for longitudinal transgender health studies in the US and none to  
17 17 date in Canada, this study and the methods employed offer an efficient, replicable and cost-  
18 18 effective way forward in creating electronic cohorts for advancing transgender health  
19 19 research.[15] Moreover, the recent rollback of sexual orientation and gender identity data  
20 20 collection and legal changes in insurance coverage of transgender healthcare in the US potentiate  
21 21 decline in accurate claims coding for gender-affirming care.[30] This highlights the utility of  
22 22 work in this area from other jurisdictions, particularly those with transgender-inclusive universal  
23 23 healthcare systems such as Canada.

24 24  
25 25 Future research should build upon the methods developed in this study and explore  
26 26 complimentary approaches for gender identity ascertainment in administrative and EHR data,  
27 27 such as machine learning approaches, as have been used to develop algorithms based on  
28 28 healthcare utilization data in other research areas. Finally, the current study lays the foundation  
29 29 for future work with the ability to study transgender health and healthcare use patterns over time,  
30 30 with linkage to laboratory data, as well as inclusion of appropriate comparison groups.[15,50]

## 31 ACKNOWLEDGEMENTS & DISCLAIMER

32 32 The authors thank the COAST study participants, the BC Centre for Excellence in HIV/AIDS,  
33 33 the BC Ministry of Health, BC Vital Statistics Agency, PharmaNet and the institutional data  
34 34 stewards for granting access to the data, and Population Data BC for facilitating the data linkage  
35 35 process. In addition, we would like to thank the COAST core team members and other support  
36 36 staff at these institutions for their administrative assistance with the data access and preparation.  
37 37 All inferences, opinions, and conclusions drawn in this paper are those of the authors, and do not  
38 38 reflect the opinions or policies of the Data Steward(s). There are no conflicts of interest to  
39 39 declare.  
40 40

## 41 COMPETING INTERESTS

42 42 None declared.  
43 43

## 44 FUNDING

45 45

1  
2  
3 1 This work was supported by the Canadian Institutes of Health Research, through an Operation  
4 2 Grant [grant number 130419], a Foundation Award to RSH [grant number 143342], and a  
5 3 Doctoral Research Award to AJR [grant number 152382] and support from the British Columbia  
6 4 Centre for Excellence in HIV/AIDS. The DTP receives funding from the provincial government  
7 5 of British Columbia (PharmaCare). The funders had no role in the study design, analysis,  
8 6 interpretation of the data, drafting of the manuscript or in the decision to submit for  
9 7 publication.  
10 8

## 11 9 **CONTRIBUTORS**

12 10 AJR led the study from conceptualization to analysis plan to interpretation, drafting of the first  
13 11 manuscript version, revisions and final version. RSH acquired study data and funding. TP, MK,  
14 12 PS, TS, and RSH all contributed to study design, interpretation of results, and reviewed manuscript  
15 13 versions. JL and MY contributed to study analysis and reviewed manuscript versions. All authors  
16 14 provided critical review of first and subsequent manuscript drafts, approved the final version, and  
17 15 agree to be accountable for the work presented.  
18 16

## 19 17 **PATIENT CONSENT FOR PUBLICATION**

20 18 Not required.  
21 19

## 22 20 **DATA SHARING STATEMENT**

23 21 The data used for this study are held by the BC Centre for Excellence in HIV/AIDS under the  
24 22 authority of the BC Ministry of Health; as they contain confidential patient health records  
25 23 including HIV serostatus, data are cannot be made available to other parties.  
26 24  
27 25  
28 26  
29 27  
30 28  
31  
32  
33  
34  
35  
36  
37  
38  
39  
40  
41  
42  
43  
44  
45  
46  
47  
48  
49  
50  
51  
52  
53  
54  
55  
56  
57  
58  
59  
60

1  
2  
3  
4  
5  
6  
7  
8  
9  
10  
11  
12  
13  
14  
15  
16  
17  
18  
19  
20  
21  
22  
23  
24  
25  
26  
27  
28  
29  
30  
31  
32  
33  
34  
35  
36  
37  
38  
39  
40  
41  
42  
43  
44  
45  
46  
47  
48  
49  
50  
51  
52  
53  
54  
55  
56  
57  
58  
59  
60

1 **FIGURES LEGENDS**

2 **Figure 1. Total transgender sample identified using a computable phenotype with**  
3 **electronic health records**

5 **Figure 2. Geographic distribution of transgender people across province, by health**  
6 **authority\***

7 *\*% of transgender individuals with known health authority (n=182)*

9 **Figure 3. Age distribution of transgender sample, by HIV serostatus**

11 **Figure 4. Co-morbidities among transgender sample, by HIV serostatus**

## 1 REFERENCES

- 2 1. Bauer GR. Making sure everyone counts: Considerations for inclusion, identification, and  
3 analysis of transgender and transsexual participants in health surveys. *What Differ Sex Gen*  
4 *Make Gen Sex Health Res Casebook*. Vancouver, Canada: Canadian Institutes of Health  
5 Research (CIHR), Institute for Gender and Health (IGH); 2012. p. 59–67.
- 6 2. Bauer GR, Hammond R, Travers R, Kaay M, Hohenadel KM, Boyce M. “I don’t think this is  
7 theoretical; this is our lives”: How erasure impacts health care for transgender people. *JANAC*.  
8 2009;20:348–361.
- 9 3. Poteat T, German D, Flynn C. The conflation of gender and sex: Gaps and opportunities in  
10 HIV data among transgender women and MSM. *Glob Public Health*. 2016;11:835–848.
- 11 4. Wanta JW, Unger CA. Review of the transgender literature: Where do we go from here?  
12 *Transgender Health*. 2017;2:119–128.
- 13 5. Herbst JH, Jacobs ED, Finlayson TJ, McKleroy VS, Neumann MS, Crepaz N, et al.  
14 Estimating HIV prevalence and risk behaviors of transgender persons in the United States: a  
15 systematic review. *AIDS Behav*. 2008;12:1–17.
- 16 6. Becasen JS, Denard CL, Mullins MM, Higa DH, Sipe TA. Estimating the prevalence of HIV  
17 and sexual behaviors among the US transgender population: A systematic review and meta-  
18 analysis, 2006–2017. *Am J Public Health*. 2019;109:e1–8.
- 19 7. Marshall Z, Welch V, Thomas J, Brunger F, Swab M, Shemilt I, et al. Documenting research  
20 with transgender and gender diverse people: protocol for an evidence map and thematic analysis.  
21 *Syst Rev*. 2017;6:35.
- 22 8. Reisner SL, Poteat T, Keatley J, Cabral M, Mothopeng T, Dunham E, et al. Global health  
23 burden and needs of transgender populations: a review. *The Lancet*. 2016;388:412–436.
- 24 9. Cathcart-Rake EJ, Lightner DJ, Quevedo FJ, Ertz DC, Jatoi A. Cancer in transgender patients:  
25 One case in 385,820 is indicative of a paucity of data. *J Oncol Pract*. 2017;JOP2017027714.
- 26 10. Meerwijk EL, Sevelius JM. Transgender population size in the United States: A meta-  
27 regression of population-based probability samples. *Am J Public Health*. 2017;107:e1–e8.
- 28 11. Flores AR, Herman JL, Gates GJ, Brown TNT. How Many Adults Identify as Transgender in  
29 the United States? [Internet]. Los Angeles, CA: Williams Institute; 2016 Jun p. 13. Available  
30 from: [https://williamsinstitute.law.ucla.edu/wp-content/uploads/How-Many-Adults-Identify-as-](https://williamsinstitute.law.ucla.edu/wp-content/uploads/How-Many-Adults-Identify-as-Transgender-in-the-United-States.pdf)  
31 [Transgender-in-the-United-States.pdf](https://williamsinstitute.law.ucla.edu/wp-content/uploads/How-Many-Adults-Identify-as-Transgender-in-the-United-States.pdf)
- 32 12. The GenIUSS Group. Best Practices for Asking Questions to Identify Transgender and Other  
33 Gender Minority Respondents on Population-Based Surveys. Los Angeles, CA: The Williams  
34 Institute; 2014.

13. Bauer GR, Braimoh J, Scheim AI, Dharma C. Transgender-inclusive measures of sex/gender for population surveys: Mixed-methods evaluation and recommendations. *PLOS ONE*. 2017;12:e0178043.
14. Collin L, Reisner SL, Tangpricha V, Goodman M. Prevalence of transgender depends on the “case” definition: A systematic review. *J Sex Med*. 2016;13:613–626.
15. Reisner SL, Deutsch MB, Bhasin S, Bockting W, Brown GR, Feldman J, et al. Advancing methods for US transgender health research. *Curr Opin Endocrinol Diabetes Obes*. 2016;23:198–207.
16. Ehrenfeld JM, Gottlieb KG, Beach LB, Monahan SE, Fabbri D. Development of a Natural Language Processing Algorithm to Identify and Evaluate Transgender Patients in Electronic Health Record System. *Ethn Dis*. 2019;29:441–50.
17. Richesson R, Smerek M, Rusincovitch S, Zozus MN, Chaudhuri PS, Hammond WE, et al. Electronic Health Records-Based Phenotyping. In: Uhlenbrauck G, editor. *NIH Collab Living Textbook Pragmatic Clin Trials*. Bethesda, Maryland; 2014.
18. Quinn VP, Nash R, Hunkeler E, Contreras R, Cromwell L, Becerra-Culqui TA, et al. Cohort profile: Study of Transition, Outcomes and Gender (STRONG) to assess health status of transgender people. *BMJ Open*. 2017;7:e018121.
19. Blosnich JR, Brown GR, Shipherd Phd JC, Kauth M, Piegari RI, Bossarte RM. Prevalence of gender identity disorder and suicide risk among transgender veterans utilizing veterans health administration care. *Am J Public Health*. 2013;103:e27–32.
20. Proctor K, Haffer SC, Ewald E, Hodge C, James CV. Identifying the transgender population in the Medicare program. *Transgender Health*. 2016;1:250–265.
21. Eyawo O, Hull MW, Salters K, Samji H, Cescon A, Sereda P, et al. Cohort profile: the Comparative Outcomes And Service Utilization Trends (COAST) Study among people living with and without HIV in British Columbia, Canada. *BMJ Open*. 2018;8:e019115.
22. Drug Treatment Program [Internet]. BC Cent. Excell. HIV/AIDS. 2010 [cited 2019 Sep 27]. Available from: <http://www.cfenet.ubc.ca/drug-treatment-program>
23. Population Data BC. About PopData [Internet]. Popul. Data BC. 2017 [cited 2019 Sep 27]. Available from: <https://www.popdata.bc.ca/aboutus>
24. British Columbia Ministry of Health (2014). Medical Services Plan (MSP) Payment Information File [Internet]. Popul. Data BC. 2014 [cited 2019 Sep 27]. Available from: <http://www.popdata.bc.ca/data>
25. British Columbia Ministry of Health (2014). Consolidation File (MSP Registration & Premium Billing) [Internet]. Popul. Data BC. 2014 [cited 2019 Sep 27]. Available from: <http://www.popdata.bc.ca/data>

- 1  
2  
3 1 26. Canadian Institute for Health Information (2014). Discharge Abstract Database (Hospital  
4 2 Separations) [Internet]. Popul. Data BC. 2014 [cited 2019 Sep 27]. Available from:  
5 3 <http://www.popdata.bc.ca/data>  
6  
7  
8 4 27. British Columbia Ministry of Health (2014). PharmaCare [Internet]. Popul. Data BC. 2014  
9 5 [cited 2019 Sep 27]. Available from: <http://www.popdata.bc.ca/data>  
10  
11 6 28. British Columbia Ministry of Health (2014). PharmaNet [Internet]. Popul. Data BC. 2014  
12 7 [cited 2019 Sep 27]. Available from: <http://www.popdata.bc.ca/data>  
13  
14 8 29. British Columbia Vital Statistics Agency (2014). Vital Statistics Deaths [Internet]. Popul.  
15 9 Data BC. 2014 [cited 2019 Sep 27]. Available from: <http://www.popdata.bc.ca>  
16  
17  
18 10 30. Arnold JD, Nelson AE, Loubier EM. Trends in Insurance Coverage for Gender-Affirming  
19 11 Surgeries. *JAMA Surg.* 2018;153:972.  
20  
21 12 31. Radix A, Sevelius J, Deutsch MB. Transgender women, hormonal therapy and HIV  
22 13 treatment: a comprehensive review of the literature and recommendations for best practices. *J Int*  
23 14 *AIDS Soc.* 2016;19:20810.  
24  
25 15 32. Rotondi NK, Bauer GR, Scanlon K, Kaay M, Travers R, Travers A. Nonprescribed hormone  
26 16 use and self-performed surgeries: “do-it-yourself” transitions in transgender communities in  
27 17 Ontario, Canada. *Am J Public Health.* 2013;103:1830–1836.  
28  
29  
30 18 33. Scheim AI, Bauer GR. Sex and gender diversity among transgender persons in Ontario,  
31 19 Canada: results from a respondent-driven sampling survey. *J Sex Res.* 2015;52:1–14.  
32  
33 20 34. Chronic Disease Information Working Group. BC Chronic Disease and Selected Procedure  
34 21 Case Definitions [Internet]. British Columbia, Canada: BC Ministry of Health; 2019 Apr p. 1–  
35 22 132. Available from: [https://www2.gov.bc.ca/assets/gov/health/conducting-health-research/data-](https://www2.gov.bc.ca/assets/gov/health/conducting-health-research/data-access/chronic-disease-registries-case-definitions.pdf)  
36 23 [access/chronic-disease-registries-case-definitions.pdf](https://www2.gov.bc.ca/assets/gov/health/conducting-health-research/data-access/chronic-disease-registries-case-definitions.pdf)  
37  
38  
39 24 35. British Columbia Cancer Agency. BC Cancer Registry Data [Internet]. Popul. Data BC. 2014  
40 25 [cited 2019 Sep 27]. Available from: <http://www.popdata.bc.ca/data>  
41  
42 26 36. BC Stats. Sub-provincial Population Estimates [Internet]. 2018 [cited 2019 Feb 1]. Available  
43 27 from: <file://localhost/Users/AJRich/Zotero/storage/5VM2LBUN/PopulationEstimates.html>  
44  
45 28 37. Hu W. Diagnostic Codes in MSP Claim Data. Program Monitoring and Information  
46 29 Management Branch, Resource Management Division, Medical Services Plan; 1996 p. 39.  
47  
48 30 38. Gerth J, Becerra-Culqui T, Bradlyn A, Getahun D, Hunkeler EM, Lash TL, et al. Agreement  
49 31 between medical records and self-reports: Implications for transgender health research. *Rev*  
50 32 *Endocr Metab Disord.* 2018;19:263–269.  
51  
52  
53 33 39. Liao KP, Cai T, Savova GK, Murphy SN, Karlson EW, Ananthakrishnan AN, et al.  
54 34 Development of phenotype algorithms using electronic medical records and incorporating natural  
55  
56  
57  
58  
59  
60



- 1  
2  
3 1 language processing. The BMJ [Internet]. 2015 [cited 2020 Oct 22];350. Available from:  
4 2 <https://www.ncbi.nlm.nih.gov/pmc/articles/PMC4707569/>  
5  
6 3 40. BC Centre for Disease Control. HIV in British Columbia: Annual Surveillance Report 2015.  
7 4 Vancouver, Canada: BC Centre for Disease Control; 2017.  
8  
9 5 41. Poteat T, Scheim A, Xavier J, Reisner S, Baral S. Global epidemiology of HIV infection and  
10 6 related syndemics affecting transgender people. *J Acquir Immune Defic Syndr*. 2016;72 Suppl  
11 7 3:S210–9.  
12  
13 8 42. Baral SD, Poteat T, Strömdahl S, Wirtz AL, Guadamuz TE, Beyrer C. Worldwide burden of  
14 9 HIV in transgender women: a systematic review and meta-analysis. *Lancet Infect Dis*.  
15 10 2013;13:214–222.  
16  
17 11 43. Centers for Disease Control and Prevention. Behavioral and Clinical Characteristics of  
18 12 Persons Receiving Medical Care for HIV Infection—Medical Monitoring Project, United States,  
19 13 2012 [Internet]. Washington, D.C.: Centers for Disease Control; 2015 Aug p. 42. Report No.: 12.  
20 14 Available from: [https://www.cdc.gov/hiv/pdf/library/reports/surveillance/cdc-hiv-](https://www.cdc.gov/hiv/pdf/library/reports/surveillance/cdc-hiv-HSSR_MMP_2012.pdf)  
21 15 [HSSR\\_MMP\\_2012.pdf](https://www.cdc.gov/hiv/pdf/library/reports/surveillance/cdc-hiv-HSSR_MMP_2012.pdf)  
22  
23 16 44. Grabovac I, Veronese N, Stefanac S, Haider S, Jackson SE, Koyanagi A, et al. Human  
24 17 Immunodeficiency Virus Infection and Diverse Physical Health Outcomes: An Umbrella Review  
25 18 of Meta-analyses of Observational Studies. *Clin Infect Dis*. 2019;ciz539.  
26  
27 19 45. Nasi M, De Biasi S, Gibellini L, Bianchini E, Pecorini S, Bacca V, et al. Ageing and  
28 20 inflammation in patients with HIV infection: Ageing, inflammation and HIV infection. *Clin Exp*  
29 21 *Immunol*. 2017;187:44–52.  
30  
31 22 46. Judge C., O’Donovan C., Callaghan G., Gaoatswe G., O’Shea D. Gender dysphoria -  
32 23 prevalence and co-morbidities in an Irish adult population. *Front Endocrinol*. 2014;5:87.  
33  
34 24 47. Cheung AS, Ooi O, Leemaqz S, Cundill P, Silberstein N, Bretherton I, et al.  
35 25 Sociodemographic and clinical characteristics of transgender adults in Australia. *Transgender*  
36 26 *Health*. 2018;3:229–38.  
37  
38 27 48. Swartz JA, Ducheny K, Holloway T, Stokes L, Willis S, Kuhns LM. A latent class analysis  
39 28 of chronic health conditions among HIV-Positive transgender women of color. *AIDS Behav*  
40 29 [Internet]. 2019 [cited 2019 Oct 2]; Available from: [http://link.springer.com/10.1007/s10461-](http://link.springer.com/10.1007/s10461-019-02543-3)  
41 30 [019-02543-3](http://link.springer.com/10.1007/s10461-019-02543-3)  
42  
43 31 49. Fisher ES, Whaley FS, Krushat WM, Malenka DJ, Fleming C, Baron JA, et al. The accuracy  
44 32 of Medicare’s hospital claims data: progress has been made, but problems remain. *Am J Public*  
45 33 *Health*. 2011;  
46  
47 34 50. Reisner SL, Radix A, Deutsch MB. Integrated and gender-affirming transgender clinical care  
48 35 and research. *J Acquir Immune Defic Syndr*. 2016;72 Suppl 3:S235–42.  
49  
50  
51  
52  
53  
54  
55  
56  
57  
58  
59  
60



1  
2  
3  
4  
5  
6  
7  
8  
9  
10  
11  
12  
13  
14  
15  
16  
17  
18  
19  
20  
21  
22  
23  
24  
25  
26  
27  
28  
29  
30  
31  
32  
33  
34  
35  
36  
37  
38  
39  
40  
41  
42  
43  
44  
45  
46  
47  
48  
49  
50  
51  
52  
53  
54  
55  
56  
57  
58  
59  
60







## Supplementary material

**Data sources and description of data elements**

| <b>Data source</b>          | <b>Data steward</b>                                            | <b>Description</b>                                                                                                                                                                                                                             | <b>Data elements provided for this study</b> |
|-----------------------------|----------------------------------------------------------------|------------------------------------------------------------------------------------------------------------------------------------------------------------------------------------------------------------------------------------------------|----------------------------------------------|
| Medical Services Plan       | British Columbia Ministry of Health                            | For individuals covered by the provincial universal health insurance plan- Medically necessary services provided by fee-for-service physicians and other healthcare providers, laboratory services, diagnostic procedures, dental/oral surgery | ICD-9 and ICD-10 codes                       |
| Consolidation file          | British Columbia Ministry of Health                            | Demographic data on individuals receiving or registered to receive care in BC, pooled from multiple PopData sources                                                                                                                            | Sociodemographics                            |
| Discharge Abstract Database | British Columbia Ministry of Health                            | Demographic, administrative and clinical data for inpatient hospital discharges and day surgeries                                                                                                                                              | ICD-9 and ICD-10 codes                       |
| Vital statistics deaths     | British Columbia Vital Statistics Agency                       | Records of all registered deaths in BC                                                                                                                                                                                                         | Death data                                   |
| Pharmacare                  | British Columbia Ministry of Health                            | Data related to prescription drugs dispensed under the BC public drug insurance program.                                                                                                                                                       | Prescription drug name/identifier            |
| Pharmanet                   | British Columbia Ministry of Health Data Stewardship Committee | Data related to prescription drugs dispensed by community and outpatient pharmacies                                                                                                                                                            | Prescription drug name/identifier            |

## Supplementary material

|                                       |                                                    |                                                                                                                                                                   |                                                                            |
|---------------------------------------|----------------------------------------------------|-------------------------------------------------------------------------------------------------------------------------------------------------------------------|----------------------------------------------------------------------------|
| Drug Treatment Program and laboratory | British Columbia Centre for Excellence in HIV/AIDS | Antiretroviral therapy use history, laboratory testing, immunological and virologic testing, and demographic data on PLWH who have accessed antiretrovirals in BC | Providers-reported transgender status, laboratory confirmed HIV serostatus |
|---------------------------------------|----------------------------------------------------|-------------------------------------------------------------------------------------------------------------------------------------------------------------------|----------------------------------------------------------------------------|

**Prescription drugs with drug identification numbers (DIN)s**

|                          | Generic Name                   | DIN     |
|--------------------------|--------------------------------|---------|
| <b>Transfeminine</b>     |                                |         |
| <b>Androgen Blockers</b> |                                |         |
| <b>Spirolactone</b>      |                                |         |
|                          | SPIRONOLACTONE                 | 28606   |
|                          | SPIRONOLACTONE                 | 613215  |
|                          | SPIRONOLACTONE                 | 285455  |
|                          | SPIRONOLACTONE                 | 613223  |
|                          | SPIRONOLACT/HYDROCHLOROTHIAZID | 180408  |
|                          | SPIRONOLACT/HYDROCHLOROTHIAZID | 613231  |
|                          | SPIRONOLACT/HYDROCHLOROTHIAZID | 594377  |
|                          | SPIRONOLACT/HYDROCHLOROTHIAZID | 657182  |
| <b>Cyproterone</b>       |                                |         |
|                          | ETHINYL ESTRADIOL/CYPROTERONE  | 2233542 |
|                          | NO GENERIC FORMULARY           | 634514  |
|                          | CYPROTERONE ACETATE            | 704431  |
|                          | CYPROTERONE ACETATE            | 2229449 |
|                          | CYPROTERONE ACETATE            | 2229723 |
|                          | CYPROTERONE ACETATE            | 2232872 |
|                          | CYPROTERONE ACETATE            | 2245898 |
|                          | CYPROTERONE ACETATE            | 704423  |
| <b>Finasteride</b>       |                                |         |
|                          | FINASTERIDE                    | 2010909 |
|                          | FINASTERIDE                    | 2238213 |
| <b>Dutasteride</b>       |                                |         |
|                          | DUTASTERIDE                    | 2247813 |
| <b>Estrogens</b>         |                                |         |
| <b>Estrogen</b>          |                                |         |
|                          | ESTROGENS,CONJUGATED           | 830240  |
|                          | ESTROGENS,CONJUGATED           | 831395  |

## Supplementary material

|    |                                |         |
|----|--------------------------------|---------|
| 1  |                                |         |
| 2  |                                |         |
| 3  |                                |         |
| 4  | ETHYNODIOL D-ETHINYL ESTRADIOL | 28630   |
| 5  | ETHYNODIOL D-ETHINYL ESTRADIOL | 469327  |
| 6  | NORETHINDRONE-MESTRANOL        | 22608   |
| 7  | NORETHINDRONE-MESTRANOL        | 22659   |
| 8  |                                |         |
| 9  | NORETHINDRONE A-E ESTRADIOL    | 297143  |
| 10 | NORETHINDRONE A-E ESTRADIOL    | 315966  |
| 11 | NORETHINDRONE-ETHINYL ESTRAD   | 317047  |
| 12 | NORETHINDRONE-ETHINYL ESTRAD   | 372846  |
| 13 | NORETHINDRONE-ETHINYL ESTRAD   | 373265  |
| 14 | NORETHINDRONE-ETHINYL ESTRAD   | 531006  |
| 15 | NORETHINDRONE-ETHINYL ESTRAD   | 538590  |
| 16 | NORETHINDRONE-ETHINYL ESTRAD   | 602957  |
| 17 | NORETHINDRONE-ETHINYL ESTRAD   | 620947  |
| 18 | NORETHINDRONE-ETHINYL ESTRAD   | 2187086 |
| 19 | NORETHINDRONE-ETHINYL ESTRAD   | 2187108 |
| 20 | NORETHINDRONE-ETHINYL ESTRAD   | 2189054 |
| 21 | NORETHINDRONE-ETHINYL ESTRAD   | 34207   |
| 22 | NORGESTREL-ETHINYL ESTRADIOL   | 300640  |
| 23 | NORGESTREL-ETHINYL ESTRADIOL   | 579386  |
| 24 | LEVONORGESTREL-ETH ESTRA       | 707600  |
| 25 | LEVONORGESTREL-ETH ESTRA       | 782416  |
| 26 | LEVONORGESTREL-ETH ESTRA       | 782432  |
| 27 | LEVONORGESTREL-ETH ESTRA       | 2042320 |
| 28 | LEVONORGESTREL-ETH ESTRA       | 2043033 |
| 29 | NORGESTREL-ETHINYL ESTRADIOL   | 2043033 |
| 30 | LEVONORGESTREL-ETH ESTRA       | 2043726 |
| 31 | NORGESTREL-ETHINYL ESTRADIOL   | 2258560 |
| 32 | NORGESTIMATE-ETHINYL ESTRADIOL | 2258560 |
| 33 | NORETHINDRONE-MESTRANOL        | 30333   |
| 34 | NORETHINDRONE-MESTRANOL        | 30341   |
| 35 | NORETHINDRONE-MESTRANOL        | 30341   |
| 36 | LEVONORGESTREL-ETH ESTRA       | 2236974 |
| 37 | LEVONORGESTREL-ETH ESTRA       | 2236974 |
| 38 | ETHYNODIOL D-ETHINYL ESTRADIOL | 471526  |
| 39 | ETHYNODIOL D-ETHINYL ESTRADIOL | 471526  |
| 40 | NORETHINDRONE-ETHINYL ESTRAD   | 340731  |
| 41 | NORETHINDRONE-ETHINYL ESTRAD   | 340731  |
| 42 | NORETHINDRONE-MESTRANOL        | 340758  |
| 43 | NORETHINDRONE-MESTRANOL        | 340758  |
| 44 | NORETHINDRONE A-E ESTRADIOL    | 343838  |
| 45 | NORETHINDRONE A-E ESTRADIOL    | 343838  |
| 46 | NORETHINDRONE A-E ESTRADIOL    | 353027  |
| 47 | NORETHINDRONE A-E ESTRADIOL    | 353027  |
| 48 | NORETHINDRONE-ETHINYL ESTRAD   | 372838  |
| 49 | NORETHINDRONE-ETHINYL ESTRAD   | 372838  |
| 50 | NORETHINDRONE-ETHINYL ESTRAD   | 373273  |
| 51 | NORETHINDRONE-ETHINYL ESTRAD   | 373273  |
| 52 | NORETHINDRONE-ETHINYL ESTRAD   | 531014  |
| 53 | NORETHINDRONE-ETHINYL ESTRAD   | 531014  |
| 54 | NORETHINDRONE-ETHINYL ESTRAD   | 602965  |
| 55 | NORETHINDRONE-ETHINYL ESTRAD   | 602965  |
| 56 | NORETHINDRONE-ETHINYL ESTRAD   | 695734  |
| 57 | NORETHINDRONE-ETHINYL ESTRAD   | 695734  |
| 58 | NORETHINDRONE-ETHINYL ESTRAD   | 2187094 |
| 59 | NORETHINDRONE-ETHINYL ESTRAD   | 2187094 |
| 60 |                                |         |



## Supplementary material

1  
2  
3  
4  
5  
6  
7  
8  
9  
10  
11  
12  
13  
14  
15  
16  
17  
18  
19  
20  
21  
22  
23  
24  
25  
26  
27  
28  
29  
30  
31  
32  
33  
34  
35  
36  
37  
38  
39  
40  
41  
42  
43  
44  
45  
46  
47  
48  
49  
50  
51  
52  
53  
54  
55  
56  
57  
58  
59  
60

|                                |         |
|--------------------------------|---------|
| NORETHINDRONE-ETHINYL ESTRAD   | 2187116 |
| NORETHINDRONE-ETHINYL ESTRAD   | 2189062 |
| ETHINYL ESTRADIOL/NORETH AC    | 2242531 |
| NORGESTREL-ETHINYL ESTRADIOL   | 340766  |
| NORGESTREL-ETHINYL ESTRADIOL   | 342815  |
| LEVONORGESTREL-ETH ESTRA       | 586609  |
| LEVONORGESTREL-ETH ESTRA       | 707503  |
| LEVONORGESTREL-ETH ESTRA       | 782424  |
| LEVONORGESTREL-ETH ESTRA       | 782440  |
| LEVONORGESTREL-ETH ESTRA       | 2042339 |
| NORGESTREL-ETHINYL ESTRADIOL   | 2043041 |
| LEVONORGESTREL-ETH ESTRA       | 2043734 |
| NORGESTIMATE-ETHINYL ESTRADIOL | 2258587 |
| LEVONORGESTREL-ETH ESTRA       | 2236975 |
| NORGESTIMATE-ETHINYL ESTRADIOL | 1968440 |
| NORGESTIMATE-ETHINYL ESTRADIOL | 2028700 |
| NORGESTIMATE-ETHINYL ESTRADIOL | 1992872 |
| NORGESTIMATE-ETHINYL ESTRADIOL | 2029421 |
| DESOGESTREL-ETHINYL ESTRADIOL  | 2042487 |
| DESOGESTREL-ETHINYL ESTRADIOL  | 2042541 |
| DESOGESTREL-ETHINYL ESTRADIOL  | 2042479 |
| DESOGESTREL-ETHINYL ESTRADIOL  | 2042533 |
| ESTRADIOL/NORETH AC            | 2241835 |
| ESTRADIOL/NORETH AC            | 2241837 |
| LEVONORGESTREL                 | 2241674 |
| ESTROGEN,CON/M-PROGEST ACET    | 2242878 |
| ESTROGEN,CON/M-PROGEST ACET    | 2242879 |
| ESTRADIOL/NORETH AC            | 2243529 |
| ESTRADIOL/NORETH AC            | 2243530 |
| ETHINYL ESTRADIOL/DROSPIRENONE | 2261723 |
| ETHINYL ESTRADIOL/DROSPIRENONE | 2261731 |
| ETONOGESTREL/ETHINYL ESTRADIOL | 2253186 |
| ETHINYL ESTRADIOL/NORELGEST    | 2248297 |
| DIENESTROL                     | 441295  |
| DIETHYLSTILBESTROL             | 3360    |
| DIETHYLSTILBESTROL             | 2091461 |
| DIETHYLSTILBESTROL             | 2091488 |
| ESTRADIOL                      | 464791  |
| ESTRADIOL                      | 2148587 |
| ESTRADIOL                      | 464805  |

## Supplementary material

1  
2  
3  
4  
5  
6  
7  
8  
9  
10  
11  
12  
13  
14  
15  
16  
17  
18  
19  
20  
21  
22  
23  
24  
25  
26  
27  
28  
29  
30  
31  
32  
33  
34  
35  
36  
37  
38  
39  
40  
41  
42  
43  
44  
45  
46  
47  
48  
49  
50  
51  
52  
53  
54  
55  
56  
57  
58  
59  
60

|                      |         |
|----------------------|---------|
| ESTRADIOL            | 2148595 |
| ESTRADIOL VALERATE   | 29238   |
| ESTRADIOL            | 756849  |
| ESTRADIOL            | 2237807 |
| ESTRADIOL            | 2243722 |
| ESTRADIOL            | 2245676 |
| ESTRADIOL            | 756857  |
| ESTRADIOL            | 2204428 |
| ESTRADIOL            | 2231509 |
| ESTRADIOL            | 2237808 |
| ESTRADIOL            | 2243724 |
| ESTRADIOL            | 2244000 |
| ESTRADIOL            | 2246967 |
| ESTRADIOL            | 756792  |
| ESTRADIOL            | 2204444 |
| ESTRADIOL            | 2231510 |
| ESTRADIOL            | 2244002 |
| ESTRADIOL            | 2246969 |
| ESTRADIOL            | 2168898 |
| ESTRADIOL            | 2204436 |
| ESTRADIOL            | 2244001 |
| ESTRADIOL            | 2246968 |
| ESTRADIOL            | 2225190 |
| ESTRADIOL            | 2204401 |
| ESTRADIOL            | 2238704 |
| ESTRADIOL            | 2243999 |
| ESTRADIOL            | 2241332 |
| ESTRADIOL            | 2247499 |
| ESTRADIOL            | 2247500 |
| ESTROGENS,CONJUGATED | 2569    |
| ESTROGENS,CONJUGATED | 2043394 |
| ESTROGENS,CONJUGATED | 2230891 |
| ESTROGENS,CONJUGATED | 2239654 |
| ESTROGENS,CONJUGATED | 2577    |
| ESTROGENS,CONJUGATED | 265470  |
| ESTROGENS,CONJUGATED | 587281  |
| ESTROGENS,CONJUGATED | 2043408 |
| ESTROGENS,CONJUGATED | 2089    |
| ESTROGENS,CONJUGATED | 2043440 |
| ESTROGENS,CONJUGATED | 403466  |

## Supplementary material

1  
2  
3  
4  
5  
6  
7  
8  
9  
10  
11  
12  
13  
14  
15  
16  
17  
18  
19  
20  
21  
22  
23  
24  
25  
26  
27  
28  
29  
30  
31  
32  
33  
34  
35  
36  
37  
38  
39  
40  
41  
42  
43  
44  
45  
46  
47  
48  
49  
50  
51  
52  
53  
54  
55  
56  
57  
58  
59  
60

|                                |          |
|--------------------------------|----------|
| ESTROGENS,CONJUGATED           | 2043416  |
| ESTROGENS,CONJUGATED           | 2230892  |
| ESTROGENS,CONJUGATED           | 2239655  |
| ESTROGENS,CONJUGATED           | 2585     |
| ESTROGENS,CONJUGATED           | 265489   |
| ESTROGENS,CONJUGATED           | 587303   |
| ESTROGENS,CONJUGATED           | 2043424  |
| ESTROGENS,CONJUGATED           | 2043432  |
| ESTROGENS,CONJUGATED           | 2043386  |
| ME-TESTOSTERONE/ESTROGEN,CON   | 53538    |
| ESTROPIPATE                    | 282685   |
| ESTROPIPATE                    | 2089769  |
| ESTROPIPATE                    | 282677   |
| ESTROPIPATE                    | 2089777  |
| ESTROPIPATE                    | 2089793  |
| ESTRADIOL/NORETH AC            | 2108186  |
| NORGESTIMATE-ETHINYL ESTRADIOL | 2229064  |
| NORGESTIMATE-ETHINYL ESTRADIOL | 2229218  |
| NORGESTIMATE-ETHINYL ESTRADIOL | 2229226  |
| ETHINYL ESTRADIOL/CYPROTERONE  | 2233542  |
| ETHINYL ESTRADIOL/NORELGEST    | 2246340  |
| NO GENERIC FORMULARY           | 66124057 |
| NO GENERIC FORMULARY           | 66124058 |
| NO GENERIC FORMULARY           | 66124060 |
| NO GENERIC FORMULARY           | 66124061 |
| NO GENERIC FORMULARY           | 66124062 |
| NO GENERIC FORMULARY           | 66124063 |
| NO GENERIC FORMULARY           | 66124064 |

---

**Progestogens**

---

**Progesterone**

---

|                          |          |
|--------------------------|----------|
| PROGESTERONE,MICRONIZED  | 2241013  |
| MEDROXYPROGESTERONE ACET | 30848    |
| MEDROXYPROGESTERONE ACET | 30856    |
| MEDROXYPROGESTERONE ACET | 585092   |
| NO GENERIC FORMULARY     | 66123240 |
| MEDROXYPROGESTERONE ACET | 708917   |
| MEDROXYPROGESTERONE ACET | 2148552  |
| MEDROXYPROGESTERONE ACET | 2221284  |
| MEDROXYPROGESTERONE ACET | 2229838  |
| MEDROXYPROGESTERONE ACET | 2244726  |

## Supplementary material

|    |                               |         |
|----|-------------------------------|---------|
| 1  |                               |         |
| 2  |                               |         |
| 3  | MEDROXYPROGESTERONE ACET      | 2246627 |
| 4  | MEDROXYPROGESTERONE ACET      | 30937   |
| 5  | MEDROXYPROGESTERONE ACET      | 2010739 |
| 6  | MEDROXYPROGESTERONE ACET      | 2148560 |
| 7  | MEDROXYPROGESTERONE ACET      | 2221292 |
| 8  | MEDROXYPROGESTERONE ACET      | 2229839 |
| 9  | MEDROXYPROGESTERONE ACET      | 2244727 |
| 10 | MEDROXYPROGESTERONE ACET      | 2246628 |
| 11 | MEDROXYPROGESTERONE ACET      | 729973  |
| 12 | MEDROXYPROGESTERONE ACET      | 2010933 |
| 13 | MEDROXYPROGESTERONE ACET      | 2148579 |
| 14 | MEDROXYPROGESTERONE ACET      | 2221306 |
| 15 | MEDROXYPROGESTERONE ACET      | 2229840 |
| 16 | MEDROXYPROGESTERONE ACET      | 2246629 |
| 17 | MEDROXYPROGESTERONE ACET      | 30945   |
| 18 | MEDROXYPROGESTERONE ACET      | 2267640 |
| 19 | MEDROXYPROGESTERONE ACET      | 2267640 |
| 20 | MEDROXYPROGESTERONE ACET      | 2267640 |
| 21 | MEDROXYPROGESTERONE ACET      | 2267640 |
| 22 | MEDROXYPROGESTERONE ACET      | 2267640 |
| 23 | MEDROXYPROGESTERONE ACET      | 2267640 |
| 24 | MEDROXYPROGESTERONE ACET      | 2267640 |
| 25 | MEDROXYPROGESTERONE ACET      | 2267640 |
| 26 | MEDROXYPROGESTERONE ACET      | 2267640 |
| 27 | MEDROXYPROGESTERONE ACET      | 2267640 |
| 28 | MEDROXYPROGESTERONE ACET      | 2267640 |
| 29 | MEDROXYPROGESTERONE ACET      | 2267640 |
| 30 | MEDROXYPROGESTERONE ACET      | 2267640 |
| 31 | MEDROXYPROGESTERONE ACET      | 2267640 |
| 32 | MEDROXYPROGESTERONE ACET      | 2267640 |
| 33 | <b>Transmasculine</b>         |         |
| 34 | <b>Testosterone</b>           |         |
| 35 | TESTOSTERONE                  | 2249499 |
| 36 | TESTOSTERONE CYPIONATE        | 30783   |
| 37 | TESTOSTERONE PROPIONATE       | 1977571 |
| 38 | TESTOSTERONE CYPIONATE        | 1977601 |
| 39 | TESTOSTERONE CYPIONATE        | 2220318 |
| 40 | TESTOSTERONE CYPIONATE        | 2246063 |
| 41 | TESTOSTERONE ENANTHATE        | 29246   |
| 42 | TESTOSTERONE ENANTHATE        | 716936  |
| 43 | TESTOSTERONE ENANTHATE        | 739944  |
| 44 | TESTOSTERONE UNDECANOATE      | 782327  |
| 45 | TESTOSTERONE ENANTHATE/ESTRAD | 108278  |
| 46 | TESTOSTERONE ENANTHATE/ESTRAD | 2061031 |
| 47 | TESTOSTERONE                  | 2239653 |
| 48 | TESTOSTERONE                  | 2245346 |
| 49 | TESTOSTERONE                  | 2245345 |
| 50 | TESTOSTERONE                  | 2245972 |
| 51 |                               |         |
| 52 |                               |         |
| 53 |                               |         |
| 54 |                               |         |
| 55 |                               |         |
| 56 |                               |         |
| 57 |                               |         |
| 58 |                               |         |
| 59 |                               |         |
| 60 |                               |         |

## Supplementary material

**Chronic condition case definitions**

| <b>Chronic condition</b> |                             | <b>Case definition</b>                                                                                                                                                                                                                                                                                                                                                                  | <b>Codes</b>                                                                                                                                                                                                                                                                                                          |
|--------------------------|-----------------------------|-----------------------------------------------------------------------------------------------------------------------------------------------------------------------------------------------------------------------------------------------------------------------------------------------------------------------------------------------------------------------------------------|-----------------------------------------------------------------------------------------------------------------------------------------------------------------------------------------------------------------------------------------------------------------------------------------------------------------------|
| Cardiovascular disease*  | Acute myocardial infarction | 1 or more hospitalizations with relevant ICD codes                                                                                                                                                                                                                                                                                                                                      | ICD-10:<br>I21 Acute myocardial infarction<br>I22 Subsequent myocardial infarction                                                                                                                                                                                                                                    |
|                          | Ischemic heart disease      | At least one of the following:<br><br>2 medical visits with Angina ICD-9 code 413 plus 1 heart disease prescription in 365 days; or 1 specialist visit with Angina ICD-9 code 413 plus 1 prescription in 365 days; or 2 medical visits with two ICD9 codes 410, 411, 412, 413, 414 in 365 days; or 1 CCI/CCP CABG,PCI/PCTA procedure code; or 1 hospitalization with relevant ICD code. | ICD-9:<br>410 Acute myocardial infarction<br>ICD-10:<br>I20 Angina pectoris<br>I21 Acute myocardial infarction I<br>22 Subsequent myocardial infarction<br>I23 Certain current complications following acute myocardial infarction<br>I24 Other acute ischaemic heart diseases<br>I25 Chronic ischaemic heart disease |
|                          | Chronic heart failure       | 1 or more hospitalizations or 2 or more medical visits in 365 days with relevant ICD codes                                                                                                                                                                                                                                                                                              | ICD-9:<br>410 Acute myocardial infarction<br>411 Other acute and subacute forms of ischaemic heart disease<br>412 Old myocardial infarction<br>413 Angina pectoris<br>414 Other forms of chronic ischaemic heart disease<br>ICD-10:<br>I50 Heart failure                                                              |
|                          | Stroke- hospital            | 1 or more hospitalizations with relevant ICD codes                                                                                                                                                                                                                                                                                                                                      | ICD-9:<br>428 Heart failure<br>ICD-10:<br>H34.1 Central retinal artery occlusion<br>I60 Subarachnoid hemorrhage<br>I61 Intracerebral haemorrhage<br>I63 Cerebral infarction (exclude<br>I63.6 Cerebral infarction due to                                                                                              |

## Supplementary material

cerebral venous thrombosis, nonpyogenic)  
 I64 Stroke, not specified as haemorrhage or infarction  
 362.3 Retinal vascular occlusion  
 430 Subarachnoid hemorrhage  
 431 Intracerebral hemorrhage  
 433.x1 Occlusion and stenosis of precerebral arteries  
 434.x Occlusion cerebral arteries  
 436 Acute but ill-defined cerebrovascular disease

*Excludes any traumatic brain injury*

Transient ischemic attack

1 or more hospitalizations with relevant ICD codes

ICD-10:  
 H34.0 Transient retinal artery occlusion  
 G45.0 Vertebro-basilar artery syndrome  
 G45.1 Carotid artery syndrome (hemispheric)  
 G45.2 Multiple and bilateral precerebral artery syndromes  
 G45.3 Amaurosis fugax  
 G45.8 Other transient cerebral ischemic attacks and related syndromes  
 G45.9 Transient cerebral ischemic attack, unspecified

ICD-9:  
 435 Transient cerebral ischemia

*Excludes any traumatic brain injury*

Chronic kidney disease\*

1 or more hospitalizations or 2 or more medical visits in 365 days with relevant ICD codes

ICD-10:  
 N01 Rapidly progressive nephritic syndrome  
 N03 Chronic nephritic syndrome  
 N04 Nephrotic syndrome  
 N05 Unspecified nephritic syndrome  
 N06 Isolated proteinuria with specified morphological lesion  
 N07 Hereditary nephropathy, not elsewhere classified

## Supplementary material

N18 Chronic kidney disease  
 N19 Unspecified kidney failure  
 N26 Unspecified contracted kidney  
 N27 Small kidney of unknown cause

## ICD-9:

581 Nephrotic syndrome 582  
 Chronic glomerulonephritis  
 583 Nephritis and nephropathy,  
 not specified as acute or chronic  
 585 Chronic renal failure 586  
 Renal failure, unspecified  
 587 Renal sclerosis, unspecified  
 589 Small kidney of unknown  
 cause

Chronic liver disease

1 or more  
 hospitalization or  
 medical visit with  
 relevant diagnosis  
 within 365 days

## ICD-9:

571.0 Alcoholic fatty liver  
 571.2 Alcoholic cirrhosis of liver  
 571.3 Alcoholic liver damage,  
 unspecified  
 571.4 Chronic hepatitis  
 571.5 Cirrhosis of liver without  
 mention of alcohol  
 571.6 Billiary cirrhosis  
 571.8 Other chronic nonalcoholic  
 liver disease  
 571.9 Unspecified chronic liver  
 disease without mention of  
 alcohol  
 070.3 Viral hepatitis B without  
 mention of hepatic coma  
 070.30 Viral hepatitis B without  
 mention of hepatic coma, acute or  
 unspecified, without mention of  
 hepatitis delta  
 070.31 Viral hepatitis B without  
 mention of hepatic coma, acute or  
 unspecified, with hepatitis delta  
 070.32 Viral hepatitis B without  
 mention of hepatic coma, chronic,  
 without mention of hepatitis delta  
 070.33 Viral hepatitis B without  
 mention of hepatic coma, chronic,  
 with hepatitis delta

## Supplementary material

070.52 Hepatitis delta without mention of active Hepatitis B disease or hepatic coma  
 V02.61 Hepatitis B carrier  
 070.42 Hepatitis delta without mention of active Hepatitis B disease with hepatic coma  
 070.54 Chronic hepatitis C without mention of hepatic coma  
 V02.62 Hepatitis C carrier

ICD-10:  
 J41 Simple and mucopurulent chronic bronchitis  
 J42 Unspecified chronic bronchitis  
 J43 Emphysema  
 J44 Other chronic obstructive pulmonary disease

ICD-9:  
 491 Chronic bronchitis  
 492 Emphysema  
 496 Chronic airways obstruction, not elsewhere classified

ICD-10:  
 E10 Type 1 diabetes mellitus  
 E11 Type 2 diabetes mellitus  
 E13 Other specified diabetes mellitus  
 E14 Unspecified diabetes mellitus

ICD-9:  
 250 Diabetes mellitus

Chronic Obstructive  
 Pulmonary Disease\*

1 or more hospitalization or 2 or more medical visits within 365 days

Diabetes Mellitus\*

At least 1 of the following:  
 1 hospitalization or 2 medical visits in 365 days with relevant ICD codes; or 2 or more insulin prescriptions in 365 days; or 2 or more oral antihyperglycemic (not including metformin) prescriptions in 365 days; or 1 insulin and 1 oral antihyperglycemic (including metformin) in 365 days; or 2 metformin prescriptions and 1 medical visit in one year with relevant ICD codes.



## Supplementary material

## Hypertension\*

*Excludes gestational diabetes.*

1 or more hospitalizations or 2 or more medical visits within 2 years with relevant ICD codes.

*Excludes gestational hypertension.*

## ICD-10:

I10 Essential (primary) hypertension

I11 Hypertensive heart disease

I12 Hypertensive renal disease

I13 Hypertensive heart and renal disease

I15 Secondary hypertension

## ICD-9:

401 Essential hypertension

402 Hypertensive heart disease

403 Hypertensive renal disease

404 Hypertensive heart and renal disease

405 Secondary hypertension

## ICD-10:

F30 Manic episode

F31 Bipolar affective disorder

F32 Depressive episode F33

Recurrent depressive disorder

F34 Persistent mood [affective] disorders

F38 Other mood [affective] disorders

F39 Unspecified mood [affective] disorder

F40 Phobic anxiety disorders

F41 Other anxiety disorders

F42 Obsessive-compulsive disorder

F43 Reaction to severe stress, and adjustment disorders

F44 Dissociative (conversion) disorders F45 Somatoform disorders

F48 Other neurotic disorders

F68 Other disorders of adult personality & behavior

F68 Other disorders of adult personality & behavior

## ICD-9:

## Mood and anxiety disorders\*

1 or more hospitalizations with a relevant ICD code or 2 or more medical visits with a relevant code within 2 years

## Supplementary material

296 Affective psychoses 300  
Neurotic disorders 311 Depressive  
disorder, not elsewhere classified

MSP DX Code:  
50B Anxiety/Depression  
*Cancer case definition details  
available from the British  
Columbia Cancer Agency:  
[http://www.bccancer.bc.ca/health-  
info/types-of-cancer](http://www.bccancer.bc.ca/health-info/types-of-cancer)*

Non-AIDS defining  
cancer† All prevalent cancer  
cases were included,  
with the exception of  
AIDS defining  
malignancies  
(Kaposi's sarcoma,  
non-Hodgkin's  
lymphoma, invasive  
cervical cancer)

Organic mental  
disorders 1 or more medical  
visits or  
hospitalizations with  
relevant diagnoses  
within 365 days

ICD-9:  
290.x Dementias  
294.x Other organic psychotic  
conditions  
331.x Alzheimer's

ICD-10:  
F00.x Dementia in Alzheimer's  
disease  
F01.x Vascular Dementia  
F02.x Dementia in other disease  
classified elsewhere  
F03.x Unspecified dementia  
F04 Amnesic disorder due to  
physiological condition  
F06 Other mental disorders due to  
known physiological condition  
F09 Unspecified mental disorder  
due to known physiological  
condition  
G30 Alzheimer's disease with  
early onset

Osteoarthritis\* 1 or more  
hospitalization or 2 or  
more medical visits in  
365 days with a  
relevant ICD code

ICD-10:  
M15 Polyarthrosis  
M16 Coxarthrosis [arthrosis of  
hip]  
M17 Gonarthrosis [arthrosis of  
knee]  
M18 Arthrosis of first  
carpometacarpal joint  
M19 Other arthrosis

## Supplementary material

|    |                       |                          |                                    |
|----|-----------------------|--------------------------|------------------------------------|
| 1  |                       |                          |                                    |
| 2  |                       |                          |                                    |
| 3  |                       |                          |                                    |
| 4  |                       |                          |                                    |
| 5  |                       |                          | ICD-9:                             |
| 6  |                       |                          | 715 Osteoarthritis and allied      |
| 7  |                       |                          | disorders                          |
| 8  | Personality disorder  | 1 or more                | ICD-9:                             |
| 9  |                       | hospitalizations or      | 301.x Personality disorders        |
| 10 |                       | medical visits with a    |                                    |
| 11 |                       | relevant diagnosis       | ICD-10:                            |
| 12 |                       | within 365 days          | F60.x Specified personality        |
| 13 |                       |                          | disorders                          |
| 14 |                       |                          | F62 Enduring personality           |
| 15 |                       |                          | changes, not attributable to brain |
| 16 |                       |                          | damage and disease                 |
| 17 |                       |                          | F68.1 Intentional production or    |
| 18 |                       |                          | feigning of symptoms or            |
| 19 |                       |                          | disabilities, either physical or   |
| 20 |                       |                          | psychological                      |
| 21 |                       |                          | F68.8 Other specified disorders or |
| 22 |                       |                          | adult personality and behaviour    |
| 23 |                       |                          | F69 Unspecified disorder or adult  |
| 24 |                       |                          | personality and behaviour          |
| 25 |                       |                          | ICD-9:                             |
| 26 |                       |                          | 295.x Schizophrenic disorders      |
| 27 | Schizophrenia related | 1 or more medical visit  | 297.0 Paranoid state, simple       |
| 28 | disorder              | or hospitalizations with | 297.1 Delusional disorder          |
| 29 |                       | relevant diagnoses       | 297.2 Paraphrenia                  |
| 30 |                       | within 365 days          | 297.3 Shared psychotic disorder    |
| 31 |                       |                          |                                    |
| 32 |                       |                          | ICD-10:                            |
| 33 |                       |                          | F20.x Paranoid schizophrenia       |
| 34 |                       |                          | F21.x Schizotypal disorder         |
| 35 |                       |                          | F23.2 Acute schizophrenia-like     |
| 36 |                       |                          | psychotic disorder                 |
| 37 |                       |                          | F25.x Schizoaffective disorders    |
| 38 |                       |                          |                                    |
| 39 |                       |                          |                                    |
| 40 |                       |                          |                                    |
| 41 |                       |                          |                                    |
| 42 |                       |                          |                                    |
| 43 |                       |                          |                                    |
| 44 |                       |                          |                                    |
| 45 |                       |                          |                                    |
| 46 |                       |                          |                                    |
| 47 |                       |                          |                                    |
| 48 |                       |                          |                                    |
| 49 |                       |                          |                                    |
| 50 |                       |                          |                                    |
| 51 |                       |                          |                                    |
| 52 |                       |                          |                                    |
| 53 |                       |                          |                                    |
| 54 |                       |                          |                                    |
| 55 |                       |                          |                                    |
| 56 |                       |                          |                                    |
| 57 |                       |                          |                                    |
| 58 |                       |                          |                                    |
| 59 |                       |                          |                                    |
| 60 |                       |                          |                                    |

\* Case definition adapted from British Columbia Ministry of Health version 2017, April 4 2019 update

† Case-definition adapted from British Columbia Cancer Agency

**The RECORD statement – checklist of items, extended from the STROBE statement, that should be reported in observational studies using routinely collected health data.**

|                           | Item No. | STROBE items                                                                                                                                                                               | Location in manuscript where items are reported | RECORD items                                                                                                                                                                                                                                                                                                                                                                                                                                | Location in manuscript where items are reported |
|---------------------------|----------|--------------------------------------------------------------------------------------------------------------------------------------------------------------------------------------------|-------------------------------------------------|---------------------------------------------------------------------------------------------------------------------------------------------------------------------------------------------------------------------------------------------------------------------------------------------------------------------------------------------------------------------------------------------------------------------------------------------|-------------------------------------------------|
| <b>Title and abstract</b> |          |                                                                                                                                                                                            |                                                 |                                                                                                                                                                                                                                                                                                                                                                                                                                             |                                                 |
|                           | 1        | (a) Indicate the study's design with a commonly used term in the title or the abstract (b) Provide in the abstract an informative and balanced summary of what was done and what was found |                                                 | RECORD 1.1: The type of data used should be specified in the title or abstract. When possible, the name of the databases used should be included.<br><br>RECORD 1.2: If applicable, the geographic region and timeframe within which the study took place should be reported in the title or abstract.<br><br>RECORD 1.3: If linkage between databases was conducted for the study, this should be clearly stated in the title or abstract. | 1.1-3: Title page                               |
| <b>Introduction</b>       |          |                                                                                                                                                                                            |                                                 |                                                                                                                                                                                                                                                                                                                                                                                                                                             |                                                 |
| Background rationale      | 2        | Explain the scientific background and rationale for the investigation being reported                                                                                                       |                                                 |                                                                                                                                                                                                                                                                                                                                                                                                                                             | Introduction (pp 4-5)                           |
| Objectives                | 3        | State specific objectives, including any prespecified hypotheses                                                                                                                           |                                                 |                                                                                                                                                                                                                                                                                                                                                                                                                                             | Introduction (page 5)                           |
| <b>Methods</b>            |          |                                                                                                                                                                                            |                                                 |                                                                                                                                                                                                                                                                                                                                                                                                                                             |                                                 |
| Study Design              | 4        | Present key elements of study design early in the paper                                                                                                                                    |                                                 |                                                                                                                                                                                                                                                                                                                                                                                                                                             | Methods (page 5); Supplementary Material        |
| Setting                   | 5        | Describe the setting, locations, and relevant dates, including periods of recruitment, exposure, follow-up, and data collection                                                            |                                                 |                                                                                                                                                                                                                                                                                                                                                                                                                                             | Methods (page 5)                                |

|                                                                                                                                                                                                            |          |                                                                                                                                                                                                                                                                                                                                                                                                                                                                                                                                                                                                                                                                                                                        |  |                                                                                                                                                                                                                                                                                                                                                                                                                                                                                                                                                                                                                                                                                                      |                                                                                                            |
|------------------------------------------------------------------------------------------------------------------------------------------------------------------------------------------------------------|----------|------------------------------------------------------------------------------------------------------------------------------------------------------------------------------------------------------------------------------------------------------------------------------------------------------------------------------------------------------------------------------------------------------------------------------------------------------------------------------------------------------------------------------------------------------------------------------------------------------------------------------------------------------------------------------------------------------------------------|--|------------------------------------------------------------------------------------------------------------------------------------------------------------------------------------------------------------------------------------------------------------------------------------------------------------------------------------------------------------------------------------------------------------------------------------------------------------------------------------------------------------------------------------------------------------------------------------------------------------------------------------------------------------------------------------------------------|------------------------------------------------------------------------------------------------------------|
| <p>1<br/>2<br/>3<br/>4<br/>5<br/>6<br/>7<br/>8<br/>9<br/>10<br/>11<br/>12<br/>13<br/>14<br/>15<br/>16<br/>17<br/>18<br/>19<br/>20<br/>21<br/>22<br/>23<br/>24<br/>25<br/>26<br/>27</p> <p>Participants</p> | <p>6</p> | <p>(a) <i>Cohort study</i> - Give the eligibility criteria, and the sources and methods of selection of participants. Describe methods of follow-up<br/> <i>Case-control study</i> - Give the eligibility criteria, and the sources and methods of case ascertainment and control selection. Give the rationale for the choice of cases and controls<br/> <i>Cross-sectional study</i> - Give the eligibility criteria, and the sources and methods of selection of participants</p> <p>(b) <i>Cohort study</i> - For matched studies, give matching criteria and number of exposed and unexposed<br/> <i>Case-control study</i> - For matched studies, give matching criteria and the number of controls per case</p> |  | <p>RECORD 6.1: The methods of study population selection (such as codes or algorithms used to identify subjects) should be listed in detail. If this is not possible, an explanation should be provided.</p> <p>RECORD 6.2: Any validation studies of the codes or algorithms used to select the population should be referenced. If validation was conducted for this study and not published elsewhere, detailed methods and results should be provided.</p> <p>RECORD 6.3: If the study involved linkage of databases, consider use of a flow diagram or other graphical display to demonstrate the data linkage process, including the number of individuals with linked data at each stage.</p> | <p>6.1: Methods (pp 6-7);<br/>Supplementary Material</p> <p>6.2: Methods (pp 6-7)</p> <p>6.3: Figure 1</p> |
| <p>28<br/>29<br/>30<br/>31<br/>32<br/>33<br/>34</p> <p>Variables</p>                                                                                                                                       | <p>7</p> | <p>Clearly define all outcomes, exposures, predictors, potential confounders, and effect modifiers. Give diagnostic criteria, if applicable.</p>                                                                                                                                                                                                                                                                                                                                                                                                                                                                                                                                                                       |  | <p>RECORD 7.1: A complete list of codes and algorithms used to classify exposures, outcomes, confounders, and effect modifiers should be provided. If these cannot be reported, an explanation should be provided.</p>                                                                                                                                                                                                                                                                                                                                                                                                                                                                               | <p>7.1: Methods (pp 6-7);<br/>Supplementary Material</p>                                                   |
| <p>35<br/>36<br/>37<br/>38<br/>39<br/>40<br/>41<br/>42<br/>43<br/>44<br/>45<br/>46<br/>47</p> <p>Data sources/<br/>measurement</p>                                                                         | <p>8</p> | <p>For each variable of interest, give sources of data and details of methods of assessment (measurement). Describe comparability of assessment methods if there is more than one group</p>                                                                                                                                                                                                                                                                                                                                                                                                                                                                                                                            |  |                                                                                                                                                                                                                                                                                                                                                                                                                                                                                                                                                                                                                                                                                                      | <p>Methods (pp 6-7)</p>                                                                                    |

|                                                                                                                                              |                                  |    |                                                                                                                                                                                                                                                                                                                                                                                                                                                                                                                                                                      |  |                                                                                                                                                       |                            |
|----------------------------------------------------------------------------------------------------------------------------------------------|----------------------------------|----|----------------------------------------------------------------------------------------------------------------------------------------------------------------------------------------------------------------------------------------------------------------------------------------------------------------------------------------------------------------------------------------------------------------------------------------------------------------------------------------------------------------------------------------------------------------------|--|-------------------------------------------------------------------------------------------------------------------------------------------------------|----------------------------|
| 1<br>2<br>3<br>4<br>5<br>6<br>7<br>8<br>9<br>10                                                                                              | Bias                             | 9  | Describe any efforts to address potential sources of bias                                                                                                                                                                                                                                                                                                                                                                                                                                                                                                            |  |                                                                                                                                                       | Discussion (pp 9, 11)      |
| 11<br>12<br>13<br>14<br>15<br>16<br>17<br>18<br>19<br>20<br>21<br>22<br>23<br>24<br>25<br>26<br>27<br>28<br>29<br>30<br>31<br>32<br>33<br>34 | Study size                       | 10 | Explain how the study size was arrived at                                                                                                                                                                                                                                                                                                                                                                                                                                                                                                                            |  |                                                                                                                                                       | Methods (page 6); Figure 1 |
| 35<br>36<br>37<br>38<br>39<br>40<br>41<br>42<br>43<br>44<br>45<br>46<br>47                                                                   | Quantitative variables           | 11 | Explain how quantitative variables were handled in the analyses. If applicable, describe which groupings were chosen, and why                                                                                                                                                                                                                                                                                                                                                                                                                                        |  |                                                                                                                                                       | Methods (pp 6-7)           |
|                                                                                                                                              | Statistical methods              | 12 | (a) Describe all statistical methods, including those used to control for confounding<br>(b) Describe any methods used to examine subgroups and interactions<br>(c) Explain how missing data were addressed<br>(d) <i>Cohort study</i> - If applicable, explain how loss to follow-up was addressed<br><i>Case-control study</i> - If applicable, explain how matching of cases and controls was addressed<br><i>Cross-sectional study</i> - If applicable, describe analytical methods taking account of sampling strategy<br>(e) Describe any sensitivity analyses |  |                                                                                                                                                       | Methods (pp 6-7)           |
|                                                                                                                                              | Data access and cleaning methods |    | ..                                                                                                                                                                                                                                                                                                                                                                                                                                                                                                                                                                   |  | RECORD 12.1: Authors should describe the extent to which the investigators had access to the database population used to create the study population. | 12.1-2: Methods            |

|                  |    |                                                                                                                                                                                                                                                                                                                                                 |  |                                                                                                                                                                                                                                                                                                                    |                               |
|------------------|----|-------------------------------------------------------------------------------------------------------------------------------------------------------------------------------------------------------------------------------------------------------------------------------------------------------------------------------------------------|--|--------------------------------------------------------------------------------------------------------------------------------------------------------------------------------------------------------------------------------------------------------------------------------------------------------------------|-------------------------------|
|                  |    |                                                                                                                                                                                                                                                                                                                                                 |  | RECORD 12.2: Authors should provide information on the data cleaning methods used in the study.                                                                                                                                                                                                                    |                               |
| Linkage          |    | ..                                                                                                                                                                                                                                                                                                                                              |  | RECORD 12.3: State whether the study included person-level, institutional-level, or other data linkage across two or more databases. The methods of linkage and methods of linkage quality evaluation should be provided.                                                                                          | Methods (page 5)              |
| <b>Results</b>   |    |                                                                                                                                                                                                                                                                                                                                                 |  |                                                                                                                                                                                                                                                                                                                    |                               |
| Participants     | 13 | (a) Report the numbers of individuals at each stage of the study ( <i>e.g.</i> , numbers potentially eligible, examined for eligibility, confirmed eligible, included in the study, completing follow-up, and analysed)<br>(b) Give reasons for non-participation at each stage.<br>(c) Consider use of a flow diagram                          |  | RECORD 13.1: Describe in detail the selection of the persons included in the study ( <i>i.e.</i> , study population selection) including filtering based on data quality, data availability and linkage. The selection of included persons can be described in the text and/or by means of the study flow diagram. | Results (page 8);<br>Figure 1 |
| Descriptive data | 14 | (a) Give characteristics of study participants ( <i>e.g.</i> , demographic, clinical, social) and information on exposures and potential confounders<br>(b) Indicate the number of participants with missing data for each variable of interest<br>(c) <i>Cohort study</i> - summarise follow-up time ( <i>e.g.</i> , average and total amount) |  |                                                                                                                                                                                                                                                                                                                    | Results (page 8)              |
| Outcome data     | 15 | <i>Cohort study</i> - Report numbers of outcome events or summary measures over time<br><i>Case-control study</i> - Report numbers in each exposure                                                                                                                                                                                             |  |                                                                                                                                                                                                                                                                                                                    | Results                       |

|                   |    |                                                                                                                                                                                                                                                                                                                                                                                                                 |  |                                                                                                                                                                                                                                                                                                          |                             |
|-------------------|----|-----------------------------------------------------------------------------------------------------------------------------------------------------------------------------------------------------------------------------------------------------------------------------------------------------------------------------------------------------------------------------------------------------------------|--|----------------------------------------------------------------------------------------------------------------------------------------------------------------------------------------------------------------------------------------------------------------------------------------------------------|-----------------------------|
|                   |    | category, or summary measures of exposure<br><i>Cross-sectional study</i> - Report numbers of outcome events or summary measures                                                                                                                                                                                                                                                                                |  |                                                                                                                                                                                                                                                                                                          |                             |
| Main results      | 16 | (a) Give unadjusted estimates and, if applicable, confounder-adjusted estimates and their precision (e.g., 95% confidence interval). Make clear which confounders were adjusted for and why they were included<br>(b) Report category boundaries when continuous variables were categorized<br>(c) If relevant, consider translating estimates of relative risk into absolute risk for a meaningful time period |  |                                                                                                                                                                                                                                                                                                          | NA                          |
| Other analyses    | 17 | Report other analyses done— e.g., analyses of subgroups and interactions, and sensitivity analyses                                                                                                                                                                                                                                                                                                              |  |                                                                                                                                                                                                                                                                                                          | NA                          |
| <b>Discussion</b> |    |                                                                                                                                                                                                                                                                                                                                                                                                                 |  |                                                                                                                                                                                                                                                                                                          |                             |
| Key results       | 18 | Summarise key results with reference to study objectives                                                                                                                                                                                                                                                                                                                                                        |  |                                                                                                                                                                                                                                                                                                          | Discussion: Page 9          |
| Limitations       | 19 | Discuss limitations of the study, taking into account sources of potential bias or imprecision. Discuss both direction and magnitude of any potential bias                                                                                                                                                                                                                                                      |  | RECORD 19.1: Discuss the implications of using data that were not created or collected to answer the specific research question(s). Include discussion of misclassification bias, unmeasured confounding, missing data, and changing eligibility over time, as they pertain to the study being reported. | Discussion: Page 9, Page 11 |
| Interpretation    | 20 | Give a cautious overall interpretation of results considering objectives,                                                                                                                                                                                                                                                                                                                                       |  |                                                                                                                                                                                                                                                                                                          | Conclusion (Page 11)        |



|                                                           |    |                                                                                                                                                               |  |                                                                                                                                                          |                      |
|-----------------------------------------------------------|----|---------------------------------------------------------------------------------------------------------------------------------------------------------------|--|----------------------------------------------------------------------------------------------------------------------------------------------------------|----------------------|
|                                                           |    | limitations, multiplicity of analyses, results from similar studies, and other relevant evidence                                                              |  |                                                                                                                                                          |                      |
| Generalisability                                          | 21 | Discuss the generalisability (external validity) of the study results                                                                                         |  |                                                                                                                                                          | Limitations (Page 9) |
| <b>Other Information</b>                                  |    |                                                                                                                                                               |  |                                                                                                                                                          |                      |
| Funding                                                   | 22 | Give the source of funding and the role of the funders for the present study and, if applicable, for the original study on which the present article is based |  |                                                                                                                                                          | Funding (Page 12)    |
| Accessibility of protocol, raw data, and programming code |    | ..                                                                                                                                                            |  | RECORD 22.1: Authors should provide information on how to access any supplemental information such as the study protocol, raw data, or programming code. | Page 12              |

\*Reference: Benchimol EI, Smeeth L, Guttman A, Harron K, Moher D, Petersen I, Sørensen HT, von Elm E, Langan SM, the RECORD Working Committee. The REporting of studies Conducted using Observational Routinely-collected health Data (RECORD) Statement. *PLoS Medicine* 2015; in press.

\*Checklist is protected under Creative Commons Attribution ([CC BY](https://creativecommons.org/licenses/by/4.0/)) license.

# BMJ Open

## Development of a computable phenotype to identify a transgender sample for health research purposes: A feasibility study in a large linked provincial healthcare administrative cohort in British Columbia, Canada

|                                 |                                                                                                                                                                                                                                                                                                                                                                                                                                                                                                                                                                                     |
|---------------------------------|-------------------------------------------------------------------------------------------------------------------------------------------------------------------------------------------------------------------------------------------------------------------------------------------------------------------------------------------------------------------------------------------------------------------------------------------------------------------------------------------------------------------------------------------------------------------------------------|
| Journal:                        | <i>BMJ Open</i>                                                                                                                                                                                                                                                                                                                                                                                                                                                                                                                                                                     |
| Manuscript ID                   | bmjopen-2020-040928.R2                                                                                                                                                                                                                                                                                                                                                                                                                                                                                                                                                              |
| Article Type:                   | Original research                                                                                                                                                                                                                                                                                                                                                                                                                                                                                                                                                                   |
| Date Submitted by the Author:   | 06-Feb-2021                                                                                                                                                                                                                                                                                                                                                                                                                                                                                                                                                                         |
| Complete List of Authors:       | Rich, Ashleigh; The University of British Columbia, School of Population & Public Health; BC Centre for Excellence in HIV/AIDS, Poteat, Tonia; University of North Carolina at Chapel Hill, Department of Social Medicine<br>Koehoorn, Mieke; University of British Columbia, School of Population and Public Health;<br>Li, Jenny; BC Centre for Excellence in HIV/AIDS,<br>Ye, Monica; BC Centre for Excellence in HIV/AIDS,<br>Sereda, Paul; British Columbia Centre for Excellence in HIV/AIDS,<br>Salway, Travis; Simon Fraser University<br>Hogg, R; Simon Fraser University, |
| <b>Primary Subject Heading</b>: | Epidemiology                                                                                                                                                                                                                                                                                                                                                                                                                                                                                                                                                                        |
| Secondary Subject Heading:      | HIV/AIDS, Health services research, Research methods, Public health                                                                                                                                                                                                                                                                                                                                                                                                                                                                                                                 |
| Keywords:                       | EPIDEMIOLOGY, PUBLIC HEALTH, Sexual and gender disorders < PSYCHIATRY, HIV & AIDS < INFECTIOUS DISEASES, SOCIAL MEDICINE                                                                                                                                                                                                                                                                                                                                                                                                                                                            |
|                                 |                                                                                                                                                                                                                                                                                                                                                                                                                                                                                                                                                                                     |

SCHOLARONE™  
Manuscripts



I, the Submitting Author has the right to grant and does grant on behalf of all authors of the Work (as defined in the below author licence), an exclusive licence and/or a non-exclusive licence for contributions from authors who are: i) UK Crown employees; ii) where BMJ has agreed a CC-BY licence shall apply, and/or iii) in accordance with the terms applicable for US Federal Government officers or employees acting as part of their official duties; on a worldwide, perpetual, irrevocable, royalty-free basis to BMJ Publishing Group Ltd ("BMJ") its licensees and where the relevant Journal is co-owned by BMJ to the co-owners of the Journal, to publish the Work in this journal and any other BMJ products and to exploit all rights, as set out in our [licence](#).

The Submitting Author accepts and understands that any supply made under these terms is made by BMJ to the Submitting Author unless you are acting as an employee on behalf of your employer or a postgraduate student of an affiliated institution which is paying any applicable article publishing charge ("APC") for Open Access articles. Where the Submitting Author wishes to make the Work available on an Open Access basis (and intends to pay the relevant APC), the terms of reuse of such Open Access shall be governed by a Creative Commons licence – details of these licences and which [Creative Commons](#) licence will apply to this Work are set out in our licence referred to above.

Other than as permitted in any relevant BMJ Author's Self Archiving Policies, I confirm this Work has not been accepted for publication elsewhere, is not being considered for publication elsewhere and does not duplicate material already published. I confirm all authors consent to publication of this Work and authorise the granting of this licence.

1  
2  
3 **1 TITLE PAGE**  
4 2

5 3 **Title:** Development of a computable phenotype to identify a transgender sample for health  
6 4 research purposes: A feasibility study in a large linked provincial healthcare  
7 5 administrative cohort in British Columbia, Canada  
8 6

9 7 **Authors:** Rich AJ<sup>1,2</sup>, Poteat T<sup>3</sup>, Koehoorn M<sup>1</sup>, Li J<sup>2</sup>, Ye M<sup>2</sup>, Sereda, P<sup>2</sup>, Salway T<sup>4</sup>, Hogg RS<sup>2,4</sup>  
10 8  
11 9

12 **Affiliations:**

- 13 10 1. School of Population and Public Health, University of British Columbia, Vancouver, Canada  
14 11 2. British Columbia Centre for Excellence in HIV/AIDS, Vancouver, Canada  
15 12 3. Department of Social Medicine, University of North Carolina- Chapel Hill, Chapel Hill, USA  
16 13 4. Faculty of Health Sciences, Simon Fraser University, Burnaby, Canada  
17 14

18 15 **Corresponding author:**

19 16 Ashleigh J Rich  
20 17 [ajrich@mail.ubc.ca](mailto:ajrich@mail.ubc.ca)  
21 18

22 19 2206 East Mall  
23 20 Vancouver, BC  
24 21 V6T 1Z3  
25 22 Canada  
26 23  
27 24  
28 25  
29 26  
30 27  
31 28  
32  
33  
34  
35  
36  
37  
38  
39  
40  
41  
42  
43  
44  
45  
46  
47  
48  
49  
50  
51  
52  
53  
54  
55  
56  
57  
58  
59  
60

## 1 ABSTRACT

2  
3  
4  
5  
6  
7  
8  
9  
10  
11  
12  
13  
14  
15  
16  
17  
18  
19  
20  
21  
22  
23  
24  
25  
26  
27  
28  
29  
30  
31  
32  
33  
34  
35  
36  
37  
38  
39  
40  
41  
42  
43  
44  
45  
46  
47  
48  
49  
50  
51  
52  
53  
54  
55  
56  
57  
58  
59  
60

**Objectives:** Innovative methods are needed for identification of transgender people in administrative records for health research purposes. This study investigated the feasibility of using transgender-specific healthcare utilization in a Canadian population-based, health records database to develop a computable phenotype (CP) and identify the proportion of transgender people within the HIV-positive population as a public health priority.

**Design:** The COAST cohort comprises a data linkage between two provincial data sources: The BC Centre for Excellence in HIV/AIDS Drug Treatment Program, which coordinates HIV treatment dispensation across BC; and Population Data BC, a provincial data repository holding individual, longitudinal data for all BC residents (1996-2013).

**Setting:** British Columbia, Canada.

**Participants:** COAST participants include 13 907 BC residents living with HIV ( $\geq 19$  years of age) and a 10% random sample comparison group of the HIV-negative general population (514 952 individuals).

**Primary and secondary outcome measures:** Healthcare records were used to identify transgender people via a CP algorithm (diagnosis codes + androgen blocker/hormone prescriptions), to examine related diagnoses and prescription concordance, and to validate the CP using an independent provider-report transgender status measure. Demographics and chronic illness burden were also characterized for the transgender sample.

**Results:** The best-performing CP identified 137 HIV-negative and 51 HIV-positive transgender people (total 188). In validity analyses, the best-performing CP had low sensitivity (27.5%, 95%CI:17.8-39.8), high specificity (99.8%, 95%CI:99.6-99.8), low agreement using Kappa statistics (0.3, 95%CI:0.2-0.5), and moderate positive predictive value (43.2%, 95%CI:28.7-58.9). There was high concordance between exogenous-sex hormone use and transgender-specific diagnoses.

**Conclusions:** The development of a validated CP opens up new opportunities for identifying transgender people for inclusion in population-based health research using administrative health data, and offers the potential for much-needed and heretofore unavailable evidence on health status, including HIV status, and the healthcare use and needs of transgender people.

**KEYWORDS:** Transgender Persons, Health Services, Algorithms, Canada

## ARTICLE SUMMARY

### Strengths and limitations of this study:

- This study demonstrates the feasibility of developing and validating a computable phenotype for identification of a transgender sample, using a population-based representative source population and healthcare records.
- A major contribution of this study is the ascertainment of the population of transgender people living with HIV in the Canadian province of British Columbia, in a universal

1  
2  
3 1 healthcare setting, using a computable phenotype, and capacity to estimate the prevalence  
4 2 of transgender status among the population living with HIV in the province.

- 5  
6 3 • Development of a validated transgender computable phenotype algorithm lays the  
7 4 foundation for future investigation of transgender-specific research questions related to  
8 5 general and HIV-specific healthcare use and health outcomes for this key population.  
9 6

10  
11  
12  
13  
14  
15  
16  
17  
18  
19  
20  
21  
22  
23  
24  
25  
26  
27  
28  
29  
30  
31  
32  
33  
34  
35  
36  
37  
38  
39  
40  
41  
42  
43  
44  
45  
46  
47  
48  
49  
50  
51  
52  
53  
54  
55  
56  
57  
58  
59  
60

For peer review only

## 1 INTRODUCTION

### 2 Limited data on transgender people

3 Transgender people are often overlooked within epidemiological research and population health  
4 surveillance due to small sample size, limited research designs, and other institutional and  
5 methodological erasures.[1–3] A 2017 review of Medline-indexed literature from 1950 to 2016  
6 found 2405 published articles including transgender people, with almost half published in the last  
7 decade.[4] A 2008 United States (US)-based meta-analysis of HIV prevalence among  
8 transgender populations found 24 studies of transgender women, and five additional studies of  
9 transgender men,[5] though an updated review found 43 primary studies on transgender women  
10 and 15 on transgender men published between 2006-2017.[6] Despite this recent increase in  
11 transgender health research in general and for HIV specifically, much of the literature has  
12 focused on transgender-specific care, mental health and HIV/sexual health,[7,8] leaving the  
13 population understudied, in particular in the broader areas of physical health and healthcare  
14 utilization.

15  
16 The erasures or exclusions of transgender persons in health studies may be explained, in part, by  
17 methodological challenges. Specific to electronic health record (EHR) data, a 2017 report  
18 identified only one transgender person among 38,5820 cancer cases in a Minnesota cancer  
19 registry,[9] clearly an undercount given that 0.4% of the US general population and 0.6% (95%  
20 credibility intervals: 0.5%-0.7%) of the Minnesota population is estimated to be  
21 transgender.[10,11] This highlights the need for improved gender ascertainment and transgender  
22 inclusion in research relying on patient records and administrative data. The establishment of  
23 best practices for measuring transgender status in survey research, such as the two-step method  
24 (measuring sex assigned at birth and current gender identity), points to a way forward for  
25 transgender-inclusive population health research.[12,13] However, innovative research methods  
26 are needed to identify transgender people in studies that rely on existing data sources (in  
27 particular EHR) and that optimize the use of transgender respondents' data in non-transgender  
28 specific research.

### 29 Computable phenotypes for transgender health research

30 Previous research in transgender health largely comprises cross-sectional studies, case reports,  
31 and qualitative or observational research.[7] Much consists of clinic- or venue-based  
32 convenience samples or lack comparison groups.[7,8] The literature is further characterized by  
33 inconsistent transgender status measurement,[14] small sample sizes, and focus on the United  
34 States (US).[8] In response, researchers have called for advancing transgender health research  
35 methods - namely ascertainment of high-quality samples via systematic approaches - including  
36 for general population-based and health systems-based studies.[15] One opportunity for the  
37 advancement of transgender health research methods is the emerging use of computable  
38 phenotypes (CPs)[16] or case ascertainment algorithms, to identify transgender samples in  
39 healthcare utilization data. A computable phenotype is an algorithm for identifying a clinical  
40 feature, condition, or set of characteristics that can be determined directly from EHR and other  
41 ancillary health care data systems (e.g., disease registries, insurance claims data) data.[17] CPs  
42 are developed using a combination of data elements (e.g., sociodemographic variables, clinical  
43 diagnoses) and value sets (i.e., the selection of a set of relevant values for each data element).  
44 Development of CPs using standardized methods and definitions enables identification and  
45 inclusion of transgender persons in research, as well as replication of analyses across data  
46

1 sources, healthcare organizations/sites and studies. CPs have application in clinical care,  
2 surveillance, and health research.

3  
4  
5  
6  
7 4 Recently, CP and other EHR-based algorithm methods have been applied in a number of settings  
8 primarily in the US to identify transgender samples for health research.[14] Specifically, the  
9 STRONG study identified a transgender cohort (n = 6,456) using EHR data from Kaiser  
10 Permanente health plan members in California and Georgia, for investigation of general and  
11 transgender-specific health outcomes.[18] Blosnich et al identified 3,177 people with a “gender  
12 identity disorder” diagnosis among military veterans accessing care through the US Veterans  
13 Health Administration healthcare system,[19] for examination of mental health and other  
14 outcomes. Researchers with the US Centers for Medicare & Medicaid Services identified 4,098  
15 transgender beneficiaries using national Medicare claims data,[20] and researchers at Vanderbilt  
16 University identified 234 transgender patients in their university clinic EHR data.[16] While  
17 these cohorts represent important opportunities for advancement of transgender health research,  
18 these methods have yet to be applied widely outside the US context. This is particularly  
19 important as different jurisdictions may vary in medical billing and coding practices, healthcare  
20 system patient populations, and representativeness of the general population. Specifically, in  
21 Canada, healthcare is delivered through a provincially administered universal healthcare system.  
22 As such, research using EHR provides an opportunity to develop methods for population-based,  
23 representative estimates of transgender populations within the Canadian context. Coupled with  
24 the current absence of gender ascertainment measures in population-based routinely collected  
25 data (e.g., census, national government health surveys, etc.) in Canada and many other  
26 jurisdictions, this remains an evidence need.

### 27 **Summary of study rationale**

28 This study investigated the application of emerging transgender health research methods,  
29 specifically CPs, in a Canadian context for the first time, testing the feasibility of identification  
30 of a transgender sample using EHR data from a provincial healthcare administrative data-linked  
31 cohort.

## 32 **METHODS**

### 33 **Data Sources and Participants**

34 The Comparative Outcomes and Service Utilization Trends Study (COAST)  
35 COAST is a population-based cohort study focused on health services utilization research  
36 questions among all people known to be living with HIV (PLWH) in the province of British  
37 Columbia (BC) and a 10% random sample comparison group of the HIV-negative general  
38 population.[21] The COAST cohort comprises individual-level, longitudinal data from PLWH  
39 who have ever accessed HIV treatment in BC between 1996 and 2013, provided by Population  
40 Data BC (PopDataBC)[21] via data linkage between two provincial data sources, by personal  
41 health number: the Drug Treatment Program (DTP) [22] and the Ministry of Health. PopDataBC  
42 provides infrastructure for access to, and linkage of, longitudinal and individual-level  
43 administrative health data for all BC residents.[23]. The HIV-negative general population cohort  
44 was drawn randomly from the Ministry of Health registry data by PopDataBC. The COAST study  
45 has received approval from the University of British Columbia/Providence Health Care  
46 Research Ethics Board (#H09-02905) and Simon Fraser University Office of Research Ethics  
47 (#2013 s0566). The study complies with the BC Freedom of Information and Protection of



1  
2  
3 1 Privacy Act (FIPPA) and did not require informed consent as it is conducted using  
4 2 retrospective administrative and anonymized data for research and statistical purposes  
5 3 only. No patients or public were involved in this study.  
6 4

#### 5 Drug Treatment Program

6 In BC, antiretroviral therapy (ART) is provided to PLWH at no cost to the patient, and distributed  
7 through the DTP.[22] The DTP contributed a provider-reported measure of transgender status for  
8 COAST.  
9

#### 10 Ministry of Health

11 Ministry of Health data available via COAST included insured medical service billing records for  
12 outpatient visits,[24,25] hospital (in-patient) visits,[26] prescription medications,[27,28] and vital  
13 statistics.[29]  
14

### 15 **Measures & Analyses**

#### 16 Transgender computable phenotypes

17 Identification of transgender cases was tested in COAST using International Classification of  
18 Disease (ICD) codes (9<sup>th</sup> and 10<sup>th</sup> editions) and exogenous sex hormone prescription use.

19 Transgender-specific diagnoses in medical and hospital billing records included the ICD-9 codes  
20 302.5 Trans-sexualism with unspecified history, 302.51 Trans-sexualism with asexual history,  
21 302.52 Trans-sexualism with homosexual history, 302.53 Trans-sexualism with heterosexual  
22 history, 302.6 Gender Identity Disorder in children, 302.85 Gender Identity Disorder in  
23 adolescents or adults; and ICD-10 codes F64.0 Gender Identity Disorder of childhood, F64.2  
24 Gender Identity Disorder of childhood, F64.8 Other Gender Identity Disorder, and F64.9 Gender  
25 Identity Disorder unspecified. The full list of androgen blockers and exogenous sex hormone  
26 prescriptions included in analyses is available in the supplementary material.  
27

#### 28 Concordance

29 To assess face validity and utility of diagnosis and prescription data over time in CP  
30 development (i.e. whether the identified transgender sample had exogenous sex hormone  
31 prescription use and other diagnoses patterns consistent with that of transgender populations in  
32 other studies), concordance analyses evaluated the presence of at least one included diagnosis  
33 and prescription during the COAST study follow-up period with the presence of at least one  
34 included diagnosis and prescription in the last study year. Concordance was assessed between  
35 transgender-specific diagnoses, exogenous sex hormone and androgen blocker prescriptions, and  
36 non-transgender specific diagnoses (ICD-9 259.9 Unspecified Endocrine Disorder and ICD-10  
37 E34.9 Endocrine Disorder, Unspecified [see supplementary material]). Endocrine disorder  
38 diagnosis codes are sometimes preferred by medical providers treating transgender people in  
39 response to historic exclusions of transgender-specific care from insurance coverage and to  
40 combat the stigma of transgender-specific diagnosis codes that have historically been classified  
41 as psychiatric disorders in the Diagnostic and Statistical Manual of Mental Disorders (DSM).[30]  
42 Exogenous sex hormone use, while common in transgender populations,[5,31] is not  
43 transgender-specific. Cisgender populations also use androgen blocker and sex hormone  
44 prescriptions (e.g. estrogen to treat menopausal symptoms in cisgender women, spironolactone is  
45 used for hypertension), thus exogenous sex hormone and androgen blocker prescription use  
56  
57  
58  
59  
60

cannot independently identify transgender people. At the same time, not all transgender people use hormones and some access via non-medical sources.[32,33]

#### Validation

In British Columbia, transgender status is collected in the DTP via a provider-reported sex variable (“Male”, “Male to Female”, “Female to Male”, or “Female”). Patients reported as either “Male to Female” or “Female to Male” were classified as transgender. The provider-reported transgender measure, available for the HIV positive cohort only, was used as a ‘gold standard’ for CP validation. Sensitivity, specificity, positive predictive value and kappa statistics with corresponding 95% confidence intervals (CI) were calculated for identifying transgender people via the CPs, in the HIV positive cohort only. Follow-up time (mean and range) for each CP group was also produced.

#### Demographics and chronic conditions

To further assess face validity of the transgender CP for future health research, descriptive statistics were calculated for the transgender sample produced via application of the best performing CP from the validation analysis to both the COAST HIV-positive and HIV-negative cohorts. Descriptive statistics included COAST study key sociodemographic and health variables, specifically laboratory confirmed HIV serostatus (HIV-positive/HIV-negative), baseline age, patient’s Health Authority (five provincial regions for the administration of health services that include large urban centres, suburban regions, and rural/remote areas), and chronic illness burden based on standardized case definitions from the BC Ministry of Health [34] and the BC Cancer Agency.[35]

## RESULTS

The total COAST cohort included 528 859 people, of which 514 952 were HIV-negative (10% general population random sample) and 13 907 were PLWH (Figure 1).

*[Figure 1 here]*

#### Concordance

Of the 237 people who had ever had a transgender-specific diagnosis during the study period, 19.4% also had a recent diagnosis in the last follow-up year (Table 1). None had an unspecified endocrine disorder diagnosis at any time; thus, this diagnosis was excluded from all CPs. Of the 237, 79.3% had an exogenous sex hormone or androgen blocker prescription at least once during the study period and 46.4% had one in the last year.

**Table 1. Concordance analyses for diagnoses and hormone measures**

|                                            | N   | %    |
|--------------------------------------------|-----|------|
| ≥ Transgender ICD- ever                    | 237 | 100  |
| ≥ Transgender ICD- recent                  | 46  | 19.4 |
| Unspecified endocrine disorder use- ever   | 0   | 0.0  |
| Unspecified endocrine disorder use- recent | 0   | 0.0  |
| ≥ Hormone/blocker use- ever                | 188 | 79.3 |
| ≥ Hormone/blocker use-recent               | 110 | 46.4 |

39

## 1 Validation

2 While no one CP consistently performed well across all validation metrics, the CP with the best  
 3 overall performance across test statistics was based on having received at least one transgender-  
 4 specific diagnosis and at least one androgen blocker/exogenous sex hormone prescription over  
 5 the study follow-up period (Table 2). This CP had high specificity (99.8%, 95% CI: 99.6-99.8),  
 6 low sensitivity (27.5%, 95% CI: 17.8-39.8), low to moderate Kappa coefficients (0.3, 95% CI:  
 7 0.2-0.5) and moderate positive predictive values (43.2%, 95% CI: 28.7-58.9). This CP also had  
 8 the second longest mean follow-up time (mean: 136.3, range: 21.0-203.0), similar overall to the  
 9 other CP groups (mean: 136.5, range: 21.0-203.0; mean: 117.1, range: 24.0-198.0; mean: 130.4,  
 10 range: 69.0-198.0; respectively).

11  
 12 **Table 2. Validation measures of transgender computable phenotype (CP) with provider-  
 13 report transgender status measures, in COAST HIV-positive cohort**

| CP                                                         | Sensitivity<br>(95% CI) | Specificity<br>(95% CI) | PPV (95%<br>CI)      | Kappa<br>(95% CI) |
|------------------------------------------------------------|-------------------------|-------------------------|----------------------|-------------------|
| ≥ 1 transgender ICD- ever                                  | 27.5 (17.8, 39.8)       | 99.7 (99.6, 99.8)       | 40.4 (26.7,<br>55.7) | 0.3 (0.2, 0.4)    |
| ≥ 1 transgender ICD- recent                                | 8.7 (3.6, 18.6)         | 100.0 (99.9,<br>100.0)  | 85.7 (42.0,<br>99.4) | 0.2 (0.1, 0.3)    |
| ≥ 1 transgender ICD AND ≥ 1<br>hormone/blocker use- ever   | 27.5 (17.8, 39.8)       | 99.8 (99.6, 99.8)       | 43.2 (28.7,<br>58.9) | 0.3 (0.2, 0.5)    |
| ≥ 1 transgender ICD AND ≥ 1<br>hormone/blocker use- recent | 7.3 (2.7, 16.8)         | 100.0 (99.9,<br>100.0)  | 83.3 (36.5,<br>99.1) | 0.1 (0.0, 0.2)    |

## 14 Transgender phenotype

15 Applying the best-performing CP, 137 HIV-negative people and 51 HIV-positive people (188  
 16 total) were identified as transgender in the respective COAST cohorts (Figure 1).

## 17 Demographics and chronic conditions

18 Demographic characteristics and chronic conditions for the 188 transgender people identified via  
 19 the best-performing CP are presented in Figures 2 to 4. Transgender people were geographical  
 20 located throughout BC health regions. The Vancouver Coastal Health Authority region, which  
 21 includes the largest municipal area in BC, had the highest concentration of transgender people  
 22 (44.2%) while the Northern Health Authority region - a predominantly rural and remote area of  
 23 the province - had the lowest (1.6%).<sup>[36]</sup> The HIV-positive group had a higher median age than  
 24 the HIV-negative group (35 [Q1, Q3: 30,42] and 30 [Q1, Q3: 19,42], respectively). For the HIV-  
 25 negative sample, the largest proportion of transgender people were aged 19 to 29 years (44.5%)  
 26 and the smallest proportion aged 55 years and older (<3%). For the HIV-positive sample, the  
 27 largest proportion were aged 30 to 34 years (25.5%) and the smallest proportion aged 55 years  
 28 and older (<2%).

1  
2  
3 1 [Figures 2 and 3 here]  
4 2

5 3 Overall, HIV-positive transgender people had a higher prevalence of at least one chronic  
6 4 condition (other than HIV) compared to HIV-negative transgender people (88.2% versus 85.4%,  
7 5 respectively), and of two or more chronic conditions (76.5% versus 52.6%, respectively).  
8 6 Specific chronic disease differences between transgender people living with and without HIV  
9 7 were most notable for a higher prevalence among the HIV-positive cohort of cardiovascular  
10 8 disease, chronic kidney disease, osteoarthritis, schizophrenia and personality disorders, and  
11 9 chronic liver disease, but a lower prevalence for hypertension.  
12  
13

14 10  
15 11 [Figure 4 here]  
16 12

## 17 13 **DISCUSSION**

18 14 This study demonstrates the feasibility of identification of a sample of transgender people in a  
19 15 large linked provincial healthcare administrative database, using a CP based on prescriptions and  
20 16 diagnoses. Among a growing number of studies using EHR and CP methods to identify  
21 17 transgender samples for health research purposes, this is the first to do so in Canada., to  
22 18 independently validate the CP using a ‘gold standard’ of provider-reported transgender status,  
23 19 and the only to use population-based data.  
24  
25

### 26 21 **Concordance**

27 22 There was high concordance between transgender-specific diagnoses and exogenous sex  
28 23 hormone or androgen blocker prescription use in this study. That nearly half of those with at  
29 24 least one transgender-specific diagnosis had been dispensed hormones or blockers in the past  
30 25 year is consistent with findings from US and Canadian studies (48.9% and 43.0%,  
31 26 respectively)[20,32,33] - suggesting face validity for the current CP.  
32  
33

### 34 28 **CP development and validation**

35 29 The best-performing CP overall successfully identified cisgender people who were truly  
36 30 cisgender (specificity) and correctly identified transgender people who were truly transgender  
37 31 (0.2% false positive rate, results not shown). However, the selected CP had relatively low  
38 32 sensitivity, missing approximately 72.5% of ‘true’ transgender people in COAST, as identified  
39 33 by the gold standard provider-based measure. Though a relatively small proportion of the ‘true’  
40 34 transgender sample was identified in this study, the impact on future analyses comparing health  
41 35 outcomes for transgender and cisgender groups is likely negligible, as even the large proportion  
42 36 of ‘true’ transgender people misclassified as cisgender (approximate n=496) is a very small  
43 37 proportion of the total COAST sample. At worst, this misclassification would bias results related  
44 38 to disparities between transgender and cisgender health toward the null, producing a conservative  
45 39 attenuated effect in COAST, and other such administrative datasets. Further, as discussed below,  
46 40 gender identity classification will likely greatly improve as transgender care shifts further into  
47 41 the fee-for-service system in BC. As in other Canadian administrative data studies, low  
48 42 sensitivity may be explained in part by provider and system billing preferences using 3-digit ICD  
49 43 diagnosis coding instead of the more specific 4-digit coding, and inconsistencies in the BC  
50 44 billing management system.[37] Despite the low sensitivity, CP development in this study with  
51 45 high specificity offers an advancement for transgender health research. A measure that correctly  
52 46 identifies cases for transgender samples in research with good success translates to better  
53  
54  
55  
56  
57  
58  
59  
60

1  
2  
3 1 opportunities to include transgender people in health studies and to investigate their health  
4 2 relative to other groups. While future research may lead to improvements in CP development, the  
5 3 CP identified in the current study with good specificity, albeit relatively poor sensitivity, has  
6 4 important utility in advancing opportunities in transgender health research. Additionally, while  
7 5 differential follow-up time can affect algorithm performance, the similar mean and range follow-  
8 6 up time for all CPs in this study suggests that differential follow-up time was not an important  
9 7 source of bias in this study.  
10 8

11 9  
12 10 The limited agreement between the CP and provider-report transgender status may be due to the  
13 11 widely varying transgender status prevalence depending on study design and ascertainment  
14 12 measures used.[14] In the BC context, the CP and the DTP measures are assessing transgender  
15 13 status in different ways and for different purposes. In the DTP, transgender status is ascertained  
16 14 in the context of HIV diagnosis and ART prescribing, during which demographics and HIV  
17 15 transmission risk factors are recorded. This differs from recording diagnoses in EHR for those  
18 16 accessing transgender-specific care as utilized in the CP. This may explain the lower PPV for the  
19 17 best-performing CP compared to the CP based on recent transgender diagnoses, suggesting the  
20 18 DTP provider-reported transgender status measure has better coverage for recent cases and the  
21 19 potential for use of recent diagnosis over ever to be beneficial in future CP development.  
22 20 Ultimately, a single CP may not be sufficient for all intended purposes and the best applicable  
23 21 CP (using different types of diagnoses, prescriptions or procedures) may differ depending on the  
24 22 intended healthcare, health research, or health policy application.[17]  
25 23  
26 24

27 25  
28 26 There is limited literature on EHR-based studies with the ability to validate an administrative  
29 27 transgender measure using a ‘gold standard’ comparison measure.[16] The two previous studies  
30 28 that have developed and validated algorithms to identify transgender individuals have both been  
31 29 conducted in non-representative samples in the US, one using Medicare data[38] and one in a  
32 30 university medical center.[16] Similar to the current study, the Medicare study found high  
33 31 specificity when comparing an EHR-based and a two-step survey-based transgender measure.  
34 32 However, the Medicare study found that the EHR measure performed consistently well with high  
35 33 sensitivity and a high Kappa statistic, unlike in the current study. Using chart review as the ‘gold  
36 34 standard’ for comparison of transgender status, Ehrenfeld et al. found a low false positive rate for  
37 35 their best-performing algorithm (3%), though not as low as the false positive rate in the current  
38 36 study. The overall high levels of agreement for transgender measures in the two previous studies  
39 37 is likely a function of the lack of independence between the ‘gold standard’ and the CP or  
40 38 algorithm measures. Specifically, only those classified as transgender in the Medicare EHR data  
41 39 were offered survey participation to complete the two-step ‘gold standard’ survey measure, and  
42 40 only those cases identified as transgender in the university clinic EHR were included in chart  
43 41 review. Thus, previous studies could assess agreement between the two measures, but not  
44 42 robustly validate either. In the current study, the DTP provider-based transgender status measure  
45 43 is independent and thus could be used for robust CP validation.  
46 44  
47 45  
48 46  
49 47  
50 48  
51 49  
52 50  
53 51  
54 52  
55 53  
56 54  
57 55  
58 56  
59 57  
60 58

59 59 While not possible to incorporate free-text records in case-finding algorithms in the current study  
60 60 as only structured EHR data is linked through COAST, it is worth noting the opportunities  
potentiated by use of NLP and machine learning approaches as methods for identifying  
transgender samples in EHR data as this research area continues to grow. Outside of transgender  
health, the use of NLP and machine learning to mine unstructured free-text EHR data has

1 demonstrated efficiency in improving case ascertainment algorithm accuracy .[39] As ‘gold  
2 standard’ two-step sex assigned at birth and current gender identity measures of transgender  
3 status[12] are slowly being implemented in routinely collected healthcare data sources, in the  
4 meantime NLPs to extract free-text data can be used to produce better gold standards against  
5 which to measure algorithm performance, as demonstrated by the Medicare study.[38]

### 7 **Transgender status prevalence & ascertainment**

8 Based on a recent meta-analysis of transgender status prevalence in population-based probability  
9 samples,[10] it was expected that an effective CP would identify 0.4% of the general population  
10 as transgender, or approximately 54 of the HIV-positive COAST cohort (n=13 907) and 3,098 of  
11 the HIV-negative cohort (n=516 340). Consistent with expectations, the best-performing CP  
12 identified 51 PLWH as transgender, equivalent to a transgender status prevalence of 0.4% among  
13 PLWH. Contrary to expectations, the best-performing CP identified less than 5% of the number  
14 of transgender persons expected in the HIV-negative cohort. This is likely a result of a number of  
15 factors including the limitation of CPs to the subset of a population accessing care as noted, and  
16 the result of most transgender people in BC receiving care currently outside the main fee-for-  
17 service healthcare delivery system. However, it is also consistent with the undercount of  
18 transgender populations using diagnostic criteria compared to other methods of ascertainment  
19 demonstrated in other studies.[14]

20  
21 Using the broadest CP algorithm (any transgender-specific diagnosis ever, n=56) and those  
22 identified by provider-report together (total n=106), the total transgender PLWH sample would  
23 represent as high as 0.88% (range: 0.73-1.1%) of the prevalent HIV infections in BC in  
24 2014.[40] This overrepresentation of transgender people among PLWH is consistent with  
25 evidence of a disproportionate HIV burden for transgender populations globally,[5,41,42] as well  
26 as in line with the only other available data on the proportion of PLWH who are transgender,  
27 from US national surveillance data (2012 data: 1.1%, 95%CI: 0.8-1.4).[43]

### 29 **Demographics and chronic conditions**

30 Despite moderate to low performance by some validation metrics, particularly low sensitivity,  
31 the CP was able to detect meaningful results in the characterization of demographics and chronic  
32 condition burden for the transgender sample - supporting CP face validity. The population  
33 density and age distribution by HIV-status of transgender people in this study is largely  
34 consistent with general population patterns, as well as the larger COAST cohort.[21,36] The  
35 overall higher burden of chronic illness for transgender people living with HIV versus without  
36 HIV in this study is consistent with elevated chronic illness risk and morbidity among non-  
37 transgender PLWH.[44] This higher chronic disease burden is linked to HIV disease processes  
38 and related inflammatory immune response.[45] While a small but growing number of studies  
39 have begun to investigate the chronic illness burden for transgender populations in other  
40 industrialized settings,[16,19,46–48] including using EHR data, findings vary widely due to  
41 differences in sampling, study design, setting and measurement.

### 43 **Limitations**

44 Findings from this study should be interpreted in the context of a few key limitations. CPs are by  
45 design only applicable to people accessing healthcare services, often motivated by illness and  
46 aided by the ability to access care. As such, this study is limited to those transgender people

1  
2  
3 1 accessing medical transition care in BC and may only represent 24% to 47% of the total  
4 2 transgender population.[33] This study was also limited by the inability to validate the  
5 3 transgender CP among the HIV-negative COAST cohort, as a 'gold standard' provider-based  
6 4 transgender measure was only available for the HIV-positive cohort. It is possible that the  
7 5 transgender CPs would perform differently in populations living without HIV, particularly as  
8 6 healthcare contact is higher among populations living with HIV. Additionally, this study should  
9 7 be considered in light of the context in which it was conducted, an environment in which  
10 8 transgender healthcare delivery in BC is currently shifting from specialized care settings to the  
11 9 main primary care fee-for-service settings. Given that COAST only includes fee-for-service data,  
12 10 this study was limited by the inability to capture transgender people who access transgender care  
13 11 outside the fee-for-service system. However, fortunately, as the shift to the fee-for-service  
14 12 system occurs, transgender ascertainment via CPs in BC will likely improve. The administrative  
15 13 data used in this study may also be susceptible to coding error (and coding biases/practices)  
16 14 across conditions and settings,[49] potentially introducing misclassification bias in terms of  
17 15 transgender ascertainment. Finally, chronic condition prevalence data reported in this study  
18 16 should be interpreted with caution, given potential selection bias by serostatus in the COAST  
19 17 cohort; though any such bias likely resulted in conservative estimates of difference by serostatus  
20 18 in this analysis.  
21  
22  
23  
24

## 25 20 CONCLUSION

26 21 This study makes a number of important contributions to the literature on innovative methods in  
27 22 transgender health. Major contributions include development and validation of a transgender CP,  
28 23 using a population-based representative source population, in the Canadian context. Another  
29 24 strength is the approximately complete ascertainment of the population of transgender PLWH in  
30 25 BC, and capacity to estimate transgender status prevalence among PLWH. In a current funding  
31 26 environment of limited support for longitudinal transgender health studies in the US and none to  
32 27 date in Canada, this study and the methods employed offer an efficient, replicable and cost-  
33 28 effective way forward in creating electronic cohorts for advancing transgender health  
34 29 research.[15] Moreover, the recent rollback of sexual orientation and gender identity data  
35 30 collection and legal changes in insurance coverage of transgender healthcare in the US potentiate  
36 31 decline in accurate claims coding for gender-affirming care.[30] This highlights the utility of  
37 32 work in this area from other jurisdictions, particularly those with transgender-inclusive universal  
38 33 healthcare systems such as Canada.  
39  
40  
41

42 35 Future research should build upon the methods developed in this study and explore  
43 36 complimentary approaches for gender identity ascertainment in administrative and EHR data,  
44 37 such as machine learning approaches, as have been used to develop algorithms based on  
45 38 healthcare utilization data in other research areas. Finally, the current study lays the foundation  
46 39 for future work with the ability to study transgender health and healthcare use patterns over time,  
47 40 with linkage to laboratory data, as well as inclusion of appropriate comparison groups.[15,50]  
48  
49

## 50 42 ACKNOWLEDGEMENTS & DISCLAIMER

51 43 The authors thank the COAST study participants, the BC Centre for Excellence in HIV/AIDS,  
52 44 the BC Ministry of Health, BC Vital Statistics Agency, PharmaNet and the institutional data  
53 45 stewards for granting access to the data, and Population Data BC for facilitating the data linkage  
54 46 process. In addition, we would like to thank the COAST core team members and other support  
55  
56  
57  
58  
59  
60

1 staff at these institutions for their administrative assistance with the data access and preparation.  
2 All inferences, opinions, and conclusions drawn in this paper are those of the authors, and do not  
3 reflect the opinions or policies of the Data Steward(s). There are no conflicts of interest to  
4 declare.  
5

#### 6 **COMPETING INTERESTS**

7 None declared.  
8

#### 9 **FUNDING**

10 This work was supported by the Canadian Institutes of Health Research, through an Operation  
11 Grant [grant number 130419], a Foundation Award to RSH [grant number 143342], and a  
12 Doctoral Research Award to AJR [grant number 152382] and support from the British Columbia  
13 Centre for Excellence in HIV/AIDS. The DTP receives funding from the provincial government  
14 of British Columbia (PharmaCare). The funders had no role in the study design, analysis,  
15 interpretation of the data, drafting of the manuscript or in the decision to submit for  
16 publication.  
17

#### 18 **CONTRIBUTORS**

19 AJR led the study from conceptualization to analysis plan to interpretation, drafting of the first  
20 manuscript version, revisions and final version. RSH acquired study data and funding. TP, MK,  
21 PS, TS, and RSH all contributed to study design, interpretation of results, and reviewed manuscript  
22 versions. JL and MY contributed to study analysis and reviewed manuscript versions. All authors  
23 provided critical review of first and subsequent manuscript drafts, approved the final version, and  
24 agree to be accountable for the work presented.  
25

#### 26 **PATIENT AND PUBLIC INVOLVEMENT**

27 No patients involved.  
28

#### 29 **DATA SHARING STATEMENT**

30 The data used for this study are held by the BC Centre for Excellence in HIV/AIDS under the  
31 authority of the BC Ministry of Health; as they contain confidential patient health records  
32 including HIV serostatus, data cannot be made available to other parties.  
33  
34  
35  
36  
37



1  
2  
3  
4  
5  
6  
7  
8  
9  
10  
11  
12  
13  
14  
15  
16  
17  
18  
19  
20  
21  
22  
23  
24  
25  
26  
27  
28  
29  
30  
31  
32  
33  
34  
35  
36  
37  
38  
39  
40  
41  
42  
43  
44  
45  
46  
47  
48  
49  
50  
51  
52  
53  
54  
55  
56  
57  
58  
59  
60

1 **FIGURES LEGENDS**

2 **Figure 1. Total transgender sample identified using a computable phenotype with**  
3 **electronic health records**

5 **Figure 2. Geographic distribution of transgender people across province, by health**  
6 **authority\***

7 *\*% of transgender individuals with known health authority (n=182)*

9 **Figure 3. Age distribution of transgender sample, by HIV serostatus**

11 **Figure 4. Co-morbidities among transgender sample, by HIV serostatus**

## 1 REFERENCES

- 2 1. Bauer GR. Making sure everyone counts: Considerations for inclusion, identification, and  
3 analysis of transgender and transsexual participants in health surveys. *What Differ Sex Gen*  
4 *Make Gen Sex Health Res Casebook*. Vancouver, Canada: Canadian Institutes of Health  
5 Research (CIHR), Institute for Gender and Health (IGH); 2012. p. 59–67.
- 6 2. Bauer GR, Hammond R, Travers R, Kaay M, Hohenadel KM, Boyce M. “I don’t think this is  
7 theoretical; this is our lives”: How erasure impacts health care for transgender people. *JANAC*.  
8 2009;20:348–361.
- 9 3. Poteat T, German D, Flynn C. The conflation of gender and sex: Gaps and opportunities in  
10 HIV data among transgender women and MSM. *Glob Public Health*. 2016;11:835–848.
- 11 4. Wanta JW, Unger CA. Review of the transgender literature: Where do we go from here?  
12 *Transgender Health*. 2017;2:119–128.
- 13 5. Herbst JH, Jacobs ED, Finlayson TJ, McKleroy VS, Neumann MS, Crepaz N, et al.  
14 Estimating HIV prevalence and risk behaviors of transgender persons in the United States: a  
15 systematic review. *AIDS Behav*. 2008;12:1–17.
- 16 6. Becasen JS, Denard CL, Mullins MM, Higa DH, Sipe TA. Estimating the prevalence of HIV  
17 and sexual behaviors among the US transgender population: A systematic review and meta-  
18 analysis, 2006–2017. *Am J Public Health*. 2019;109:e1–8.
- 19 7. Marshall Z, Welch V, Thomas J, Brunger F, Swab M, Shemilt I, et al. Documenting research  
20 with transgender and gender diverse people: protocol for an evidence map and thematic analysis.  
21 *Syst Rev*. 2017;6:35.
- 22 8. Reisner SL, Poteat T, Keatley J, Cabral M, Mothopeng T, Dunham E, et al. Global health  
23 burden and needs of transgender populations: a review. *The Lancet*. 2016;388:412–436.
- 24 9. Cathcart-Rake EJ, Lightner DJ, Quevedo FJ, Ertz DC, Jatoi A. Cancer in transgender patients:  
25 One case in 385,820 is indicative of a paucity of data. *J Oncol Pract*. 2017;JOP2017027714.
- 26 10. Meerwijk EL, Sevelius JM. Transgender population size in the United States: A meta-  
27 regression of population-based probability samples. *Am J Public Health*. 2017;107:e1–e8.
- 28 11. Flores AR, Herman JL, Gates GJ, Brown TNT. How Many Adults Identify as Transgender in  
29 the United States? [Internet]. Los Angeles, CA: Williams Institute; 2016 Jun p. 13. Available  
30 from: [https://williamsinstitute.law.ucla.edu/wp-content/uploads/How-Many-Adults-Identify-as-](https://williamsinstitute.law.ucla.edu/wp-content/uploads/How-Many-Adults-Identify-as-Transgender-in-the-United-States.pdf)  
31 [Transgender-in-the-United-States.pdf](https://williamsinstitute.law.ucla.edu/wp-content/uploads/How-Many-Adults-Identify-as-Transgender-in-the-United-States.pdf)
- 32 12. The GenIUSS Group. Best Practices for Asking Questions to Identify Transgender and Other  
33 Gender Minority Respondents on Population-Based Surveys. Los Angeles, CA: The Williams  
34 Institute; 2014.

13. Bauer GR, Braimoh J, Scheim AI, Dharma C. Transgender-inclusive measures of sex/gender for population surveys: Mixed-methods evaluation and recommendations. *PLOS ONE*. 2017;12:e0178043.
14. Collin L, Reisner SL, Tangpricha V, Goodman M. Prevalence of transgender depends on the “case” definition: A systematic review. *J Sex Med*. 2016;13:613–626.
15. Reisner SL, Deutsch MB, Bhasin S, Bockting W, Brown GR, Feldman J, et al. Advancing methods for US transgender health research. *Curr Opin Endocrinol Diabetes Obes*. 2016;23:198–207.
16. Ehrenfeld JM, Gottlieb KG, Beach LB, Monahan SE, Fabbri D. Development of a Natural Language Processing Algorithm to Identify and Evaluate Transgender Patients in Electronic Health Record System. *Ethn Dis*. 2019;29:441–50.
17. Richesson R, Smerek M, Rusincovitch S, Zozus MN, Chaudhuri PS, Hammond WE, et al. Electronic Health Records-Based Phenotyping. In: Uhlenbrauck G, editor. *NIH Collab Living Textbook Pragmatic Clin Trials*. Bethesda, Maryland; 2014.
18. Quinn VP, Nash R, Hunkeler E, Contreras R, Cromwell L, Becerra-Culqui TA, et al. Cohort profile: Study of Transition, Outcomes and Gender (STRONG) to assess health status of transgender people. *BMJ Open*. 2017;7:e018121.
19. Blosnich JR, Brown GR, Shipherd Phd JC, Kauth M, Piegari RI, Bossarte RM. Prevalence of gender identity disorder and suicide risk among transgender veterans utilizing veterans health administration care. *Am J Public Health*. 2013;103:e27–32.
20. Proctor K, Haffer SC, Ewald E, Hodge C, James CV. Identifying the transgender population in the Medicare program. *Transgender Health*. 2016;1:250–265.
21. Eyawo O, Hull MW, Salters K, Samji H, Cescon A, Sereda P, et al. Cohort profile: the Comparative Outcomes And Service Utilization Trends (COAST) Study among people living with and without HIV in British Columbia, Canada. *BMJ Open*. 2018;8:e019115.
22. Drug Treatment Program [Internet]. BC Cent. Excell. HIV/AIDS. 2010 [cited 2019 Sep 27]. Available from: <http://www.cfenet.ubc.ca/drug-treatment-program>
23. Population Data BC. About PopData [Internet]. Popul. Data BC. 2017 [cited 2019 Sep 27]. Available from: <https://www.popdata.bc.ca/aboutus>
24. British Columbia Ministry of Health (2014). Medical Services Plan (MSP) Payment Information File [Internet]. Popul. Data BC. 2014 [cited 2019 Sep 27]. Available from: <http://www.popdata.bc.ca/data>
25. British Columbia Ministry of Health (2014). Consolidation File (MSP Registration & Premium Billing) [Internet]. Popul. Data BC. 2014 [cited 2019 Sep 27]. Available from: <http://www.popdata.bc.ca/data>

- 1  
2  
3 1 26. Canadian Institute for Health Information (2014). Discharge Abstract Database (Hospital  
4 2 Separations) [Internet]. Popul. Data BC. 2014 [cited 2019 Sep 27]. Available from:  
5 3 <http://www.popdata.bc.ca/data>  
6  
7  
8 4 27. British Columbia Ministry of Health (2014). PharmaCare [Internet]. Popul. Data BC. 2014  
9 5 [cited 2019 Sep 27]. Available from: <http://www.popdata.bc.ca/data>  
10  
11 6 28. British Columbia Ministry of Health (2014). PharmaNet [Internet]. Popul. Data BC. 2014  
12 7 [cited 2019 Sep 27]. Available from: <http://www.popdata.bc.ca/data>  
13  
14 8 29. British Columbia Vital Statistics Agency (2014). Vital Statistics Deaths [Internet]. Popul.  
15 9 Data BC. 2014 [cited 2019 Sep 27]. Available from: <http://www.popdata.bc.ca>  
16  
17  
18 10 30. Arnold JD, Nelson AE, Loubier EM. Trends in Insurance Coverage for Gender-Affirming  
19 11 Surgeries. *JAMA Surg.* 2018;153:972.  
20  
21 12 31. Radix A, Sevelius J, Deutsch MB. Transgender women, hormonal therapy and HIV  
22 13 treatment: a comprehensive review of the literature and recommendations for best practices. *J Int*  
23 14 *AIDS Soc.* 2016;19:20810.  
24  
25 15 32. Rotondi NK, Bauer GR, Scanlon K, Kaay M, Travers R, Travers A. Nonprescribed hormone  
26 16 use and self-performed surgeries: “do-it-yourself” transitions in transgender communities in  
27 17 Ontario, Canada. *Am J Public Health.* 2013;103:1830–1836.  
28  
29  
30 18 33. Scheim AI, Bauer GR. Sex and gender diversity among transgender persons in Ontario,  
31 19 Canada: results from a respondent-driven sampling survey. *J Sex Res.* 2015;52:1–14.  
32  
33 20 34. Chronic Disease Information Working Group. BC Chronic Disease and Selected Procedure  
34 21 Case Definitions [Internet]. British Columbia, Canada: BC Ministry of Health; 2019 Apr p. 1–  
35 22 132. Available from: [https://www2.gov.bc.ca/assets/gov/health/conducting-health-research/data-](https://www2.gov.bc.ca/assets/gov/health/conducting-health-research/data-access/chronic-disease-registries-case-definitions.pdf)  
36 23 [access/chronic-disease-registries-case-definitions.pdf](https://www2.gov.bc.ca/assets/gov/health/conducting-health-research/data-access/chronic-disease-registries-case-definitions.pdf)  
37  
38  
39 24 35. British Columbia Cancer Agency. BC Cancer Registry Data [Internet]. Popul. Data BC. 2014  
40 25 [cited 2019 Sep 27]. Available from: <http://www.popdata.bc.ca/data>  
41  
42 26 36. BC Stats. Sub-provincial Population Estimates [Internet]. 2018 [cited 2019 Feb 1]. Available  
43 27 from: <file://localhost/Users/AJRich/Zotero/storage/5VM2LBUN/PopulationEstimates.html>  
44  
45 28 37. Hu W. Diagnostic Codes in MSP Claim Data. Program Monitoring and Information  
46 29 Management Branch, Resource Management Division, Medical Services Plan; 1996 p. 39.  
47  
48 30 38. Gerth J, Becerra-Culqui T, Bradlyn A, Getahun D, Hunkeler EM, Lash TL, et al. Agreement  
49 31 between medical records and self-reports: Implications for transgender health research. *Rev*  
50 32 *Endocr Metab Disord.* 2018;19:263–269.  
51  
52  
53 33 39. Liao KP, Cai T, Savova GK, Murphy SN, Karlson EW, Ananthakrishnan AN, et al.  
54 34 Development of phenotype algorithms using electronic medical records and incorporating natural  
55  
56  
57  
58  
59  
60

- 1  
2  
3 1 language processing. The BMJ [Internet]. 2015 [cited 2020 Oct 22];350. Available from:  
4 2 <https://www.ncbi.nlm.nih.gov/pmc/articles/PMC4707569/>  
5  
6 3 40. BC Centre for Disease Control. HIV in British Columbia: Annual Surveillance Report 2015.  
7 4 Vancouver, Canada: BC Centre for Disease Control; 2017.  
8  
9 5 41. Poteat T, Scheim A, Xavier J, Reisner S, Baral S. Global epidemiology of HIV infection and  
10 6 related syndemics affecting transgender people. *J Acquir Immune Defic Syndr*. 2016;72 Suppl  
11 7 3:S210–9.  
12  
13 8 42. Baral SD, Poteat T, Strömdahl S, Wirtz AL, Guadamuz TE, Beyrer C. Worldwide burden of  
14 9 HIV in transgender women: a systematic review and meta-analysis. *Lancet Infect Dis*.  
15 10 2013;13:214–222.  
16  
17 11 43. Centers for Disease Control and Prevention. Behavioral and Clinical Characteristics of  
18 12 Persons Receiving Medical Care for HIV Infection—Medical Monitoring Project, United States,  
19 13 2012 [Internet]. Washington, D.C.: Centers for Disease Control; 2015 Aug p. 42. Report No.: 12.  
20 14 Available from: [https://www.cdc.gov/hiv/pdf/library/reports/surveillance/cdc-hiv-](https://www.cdc.gov/hiv/pdf/library/reports/surveillance/cdc-hiv-HSSR_MMP_2012.pdf)  
21 15 [HSSR\\_MMP\\_2012.pdf](https://www.cdc.gov/hiv/pdf/library/reports/surveillance/cdc-hiv-HSSR_MMP_2012.pdf)  
22  
23 16 44. Grabovac I, Veronese N, Stefanac S, Haider S, Jackson SE, Koyanagi A, et al. Human  
24 17 Immunodeficiency Virus Infection and Diverse Physical Health Outcomes: An Umbrella Review  
25 18 of Meta-analyses of Observational Studies. *Clin Infect Dis*. 2019;ciz539.  
26  
27 19 45. Nasi M, De Biasi S, Gibellini L, Bianchini E, Pecorini S, Bacca V, et al. Ageing and  
28 20 inflammation in patients with HIV infection: Ageing, inflammation and HIV infection. *Clin Exp*  
29 21 *Immunol*. 2017;187:44–52.  
30  
31 22 46. Judge C., O’Donovan C., Callaghan G., Gaoatswe G., O’Shea D. Gender dysphoria -  
32 23 prevalence and co-morbidities in an Irish adult population. *Front Endocrinol*. 2014;5:87.  
33  
34 24 47. Cheung AS, Ooi O, Leemaqz S, Cundill P, Silberstein N, Bretherton I, et al.  
35 25 Sociodemographic and clinical characteristics of transgender adults in Australia. *Transgender*  
36 26 *Health*. 2018;3:229–38.  
37  
38 27 48. Swartz JA, Ducheny K, Holloway T, Stokes L, Willis S, Kuhns LM. A latent class analysis  
39 28 of chronic health conditions among HIV-Positive transgender women of color. *AIDS Behav*  
40 29 [Internet]. 2019 [cited 2019 Oct 2]; Available from: [http://link.springer.com/10.1007/s10461-](http://link.springer.com/10.1007/s10461-019-02543-3)  
41 30 [019-02543-3](http://link.springer.com/10.1007/s10461-019-02543-3)  
42  
43 31 49. Fisher ES, Whaley FS, Krushat WM, Malenka DJ, Fleming C, Baron JA, et al. The accuracy  
44 32 of Medicare’s hospital claims data: progress has been made, but problems remain. *Am J Public*  
45 33 *Health*. 2011;  
46  
47 34 50. Reisner SL, Radix A, Deutsch MB. Integrated and gender-affirming transgender clinical care  
48 35 and research. *J Acquir Immune Defic Syndr*. 2016;72 Suppl 3:S235–42.  
49  
50  
51  
52  
53  
54  
55  
56  
57  
58  
59  
60

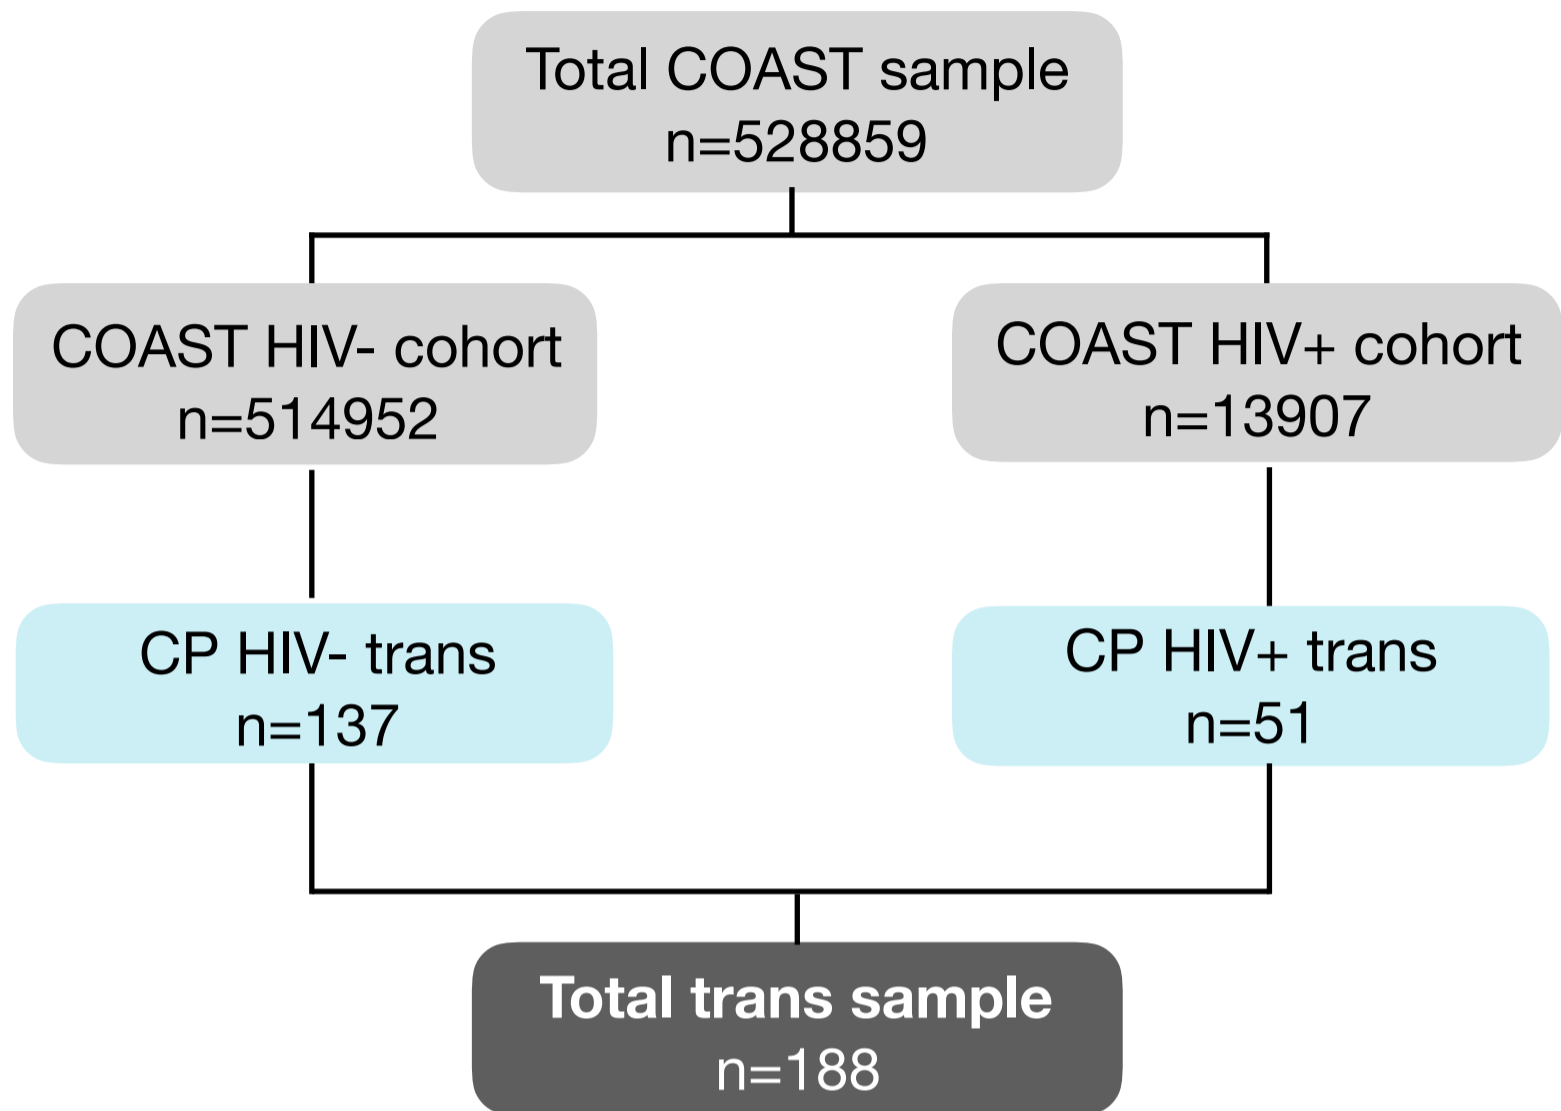

1  
2  
3  
4  
5  
6  
7  
8  
9  
10  
11  
12  
13  
14  
15  
16  
17  
18  
19  
20  
21  
22  
23  
24  
25  
26  
27  
28  
29  
30  
31  
32  
33  
34  
35  
36  
37  
38  
39  
40  
41  
42  
43  
44  
45  
46  
47  
48  
49  
50  
51  
52  
53  
54  
55  
56  
57  
58  
59  
60









## Supplementary material

**Data sources and description of data elements**

| <b>Data source</b>          | <b>Data steward</b>                                            | <b>Description</b>                                                                                                                                                                                                                             | <b>Data elements provided for this study</b> |
|-----------------------------|----------------------------------------------------------------|------------------------------------------------------------------------------------------------------------------------------------------------------------------------------------------------------------------------------------------------|----------------------------------------------|
| Medical Services Plan       | British Columbia Ministry of Health                            | For individuals covered by the provincial universal health insurance plan- Medically necessary services provided by fee-for-service physicians and other healthcare providers, laboratory services, diagnostic procedures, dental/oral surgery | ICD-9 and ICD-10 codes                       |
| Consolidation file          | British Columbia Ministry of Health                            | Demographic data on individuals receiving or registered to receive care in BC, pooled from multiple PopData sources                                                                                                                            | Sociodemographics                            |
| Discharge Abstract Database | British Columbia Ministry of Health                            | Demographic, administrative and clinical data for inpatient hospital discharges and day surgeries                                                                                                                                              | ICD-9 and ICD-10 codes                       |
| Vital statistics deaths     | British Columbia Vital Statistics Agency                       | Records of all registered deaths in BC                                                                                                                                                                                                         | Death data                                   |
| Pharmacare                  | British Columbia Ministry of Health                            | Data related to prescription drugs dispensed under the BC public drug insurance program.                                                                                                                                                       | Prescription drug name/identifier            |
| Pharmanet                   | British Columbia Ministry of Health Data Stewardship Committee | Data related to prescription drugs dispensed by community and outpatient pharmacies                                                                                                                                                            | Prescription drug name/identifier            |

## Supplementary material

|                                       |                                                    |                                                                                                                                                                   |                                                                            |
|---------------------------------------|----------------------------------------------------|-------------------------------------------------------------------------------------------------------------------------------------------------------------------|----------------------------------------------------------------------------|
| Drug Treatment Program and laboratory | British Columbia Centre for Excellence in HIV/AIDS | Antiretroviral therapy use history, laboratory testing, immunological and virologic testing, and demographic data on PLWH who have accessed antiretrovirals in BC | Providers-reported transgender status, laboratory confirmed HIV serostatus |
|---------------------------------------|----------------------------------------------------|-------------------------------------------------------------------------------------------------------------------------------------------------------------------|----------------------------------------------------------------------------|

**Prescription drugs with drug identification numbers (DIN)s**

|                          | Generic Name                   | DIN     |
|--------------------------|--------------------------------|---------|
| <b>Transfeminine</b>     |                                |         |
| <b>Androgen Blockers</b> |                                |         |
| <b>Spirolactone</b>      |                                |         |
|                          | SPIRONOLACTONE                 | 28606   |
|                          | SPIRONOLACTONE                 | 613215  |
|                          | SPIRONOLACTONE                 | 285455  |
|                          | SPIRONOLACTONE                 | 613223  |
|                          | SPIRONOLACT/HYDROCHLOROTHIAZID | 180408  |
|                          | SPIRONOLACT/HYDROCHLOROTHIAZID | 613231  |
|                          | SPIRONOLACT/HYDROCHLOROTHIAZID | 594377  |
|                          | SPIRONOLACT/HYDROCHLOROTHIAZID | 657182  |
| <b>Cyproterone</b>       |                                |         |
|                          | ETHINYL ESTRADIOL/CYPROTERONE  | 2233542 |
|                          | NO GENERIC FORMULARY           | 634514  |
|                          | CYPROTERONE ACETATE            | 704431  |
|                          | CYPROTERONE ACETATE            | 2229449 |
|                          | CYPROTERONE ACETATE            | 2229723 |
|                          | CYPROTERONE ACETATE            | 2232872 |
|                          | CYPROTERONE ACETATE            | 2245898 |
|                          | CYPROTERONE ACETATE            | 704423  |
| <b>Finasteride</b>       |                                |         |
|                          | FINASTERIDE                    | 2010909 |
|                          | FINASTERIDE                    | 2238213 |
| <b>Dutasteride</b>       |                                |         |
|                          | DUTASTERIDE                    | 2247813 |
| <b>Estrogens</b>         |                                |         |
| <b>Estrogen</b>          |                                |         |
|                          | ESTROGENS,CONJUGATED           | 830240  |
|                          | ESTROGENS,CONJUGATED           | 831395  |

## Supplementary material

|    |                                |         |
|----|--------------------------------|---------|
| 1  |                                |         |
| 2  |                                |         |
| 3  |                                |         |
| 4  | ETHYNODIOL D-ETHINYL ESTRADIOL | 28630   |
| 5  | ETHYNODIOL D-ETHINYL ESTRADIOL | 469327  |
| 6  | NORETHINDRONE-MESTRANOL        | 22608   |
| 7  | NORETHINDRONE-MESTRANOL        | 22659   |
| 8  |                                |         |
| 9  | NORETHINDRONE A-E ESTRADIOL    | 297143  |
| 10 | NORETHINDRONE A-E ESTRADIOL    | 315966  |
| 11 | NORETHINDRONE-ETHINYL ESTRAD   | 317047  |
| 12 | NORETHINDRONE-ETHINYL ESTRAD   | 372846  |
| 13 | NORETHINDRONE-ETHINYL ESTRAD   | 373265  |
| 14 | NORETHINDRONE-ETHINYL ESTRAD   | 531006  |
| 15 | NORETHINDRONE-ETHINYL ESTRAD   | 538590  |
| 16 | NORETHINDRONE-ETHINYL ESTRAD   | 602957  |
| 17 | NORETHINDRONE-ETHINYL ESTRAD   | 620947  |
| 18 | NORETHINDRONE-ETHINYL ESTRAD   | 2187086 |
| 19 | NORETHINDRONE-ETHINYL ESTRAD   | 2187108 |
| 20 | NORETHINDRONE-ETHINYL ESTRAD   | 2189054 |
| 21 | NORETHINDRONE-ETHINYL ESTRAD   | 34207   |
| 22 | NORGESTREL-ETHINYL ESTRADIOL   | 300640  |
| 23 | NORGESTREL-ETHINYL ESTRADIOL   | 579386  |
| 24 | LEVONORGESTREL-ETH ESTRA       | 707600  |
| 25 | LEVONORGESTREL-ETH ESTRA       | 782416  |
| 26 | LEVONORGESTREL-ETH ESTRA       | 782432  |
| 27 | LEVONORGESTREL-ETH ESTRA       | 2042320 |
| 28 | LEVONORGESTREL-ETH ESTRA       | 2043033 |
| 29 | NORGESTREL-ETHINYL ESTRADIOL   | 2043726 |
| 30 | LEVONORGESTREL-ETH ESTRA       | 2258560 |
| 31 | NORGESTIMATE-ETHINYL ESTRADIOL | 30333   |
| 32 | NORETHINDRONE-MESTRANOL        | 30341   |
| 33 | NORETHINDRONE-MESTRANOL        | 2236974 |
| 34 | LEVONORGESTREL-ETH ESTRA       | 471526  |
| 35 | ETHYNODIOL D-ETHINYL ESTRADIOL | 340731  |
| 36 | NORETHINDRONE-ETHINYL ESTRAD   | 340758  |
| 37 | NORETHINDRONE-MESTRANOL        | 343838  |
| 38 | NORETHINDRONE A-E ESTRADIOL    | 343838  |
| 39 | NORETHINDRONE A-E ESTRADIOL    | 353027  |
| 40 | NORETHINDRONE-ETHINYL ESTRAD   | 372838  |
| 41 | NORETHINDRONE-ETHINYL ESTRAD   | 373273  |
| 42 | NORETHINDRONE-ETHINYL ESTRAD   | 531014  |
| 43 | NORETHINDRONE-ETHINYL ESTRAD   | 602965  |
| 44 | NORETHINDRONE-ETHINYL ESTRAD   | 695734  |
| 45 | NORETHINDRONE-ETHINYL ESTRAD   | 2187094 |
| 46 |                                |         |
| 47 |                                |         |
| 48 |                                |         |
| 49 |                                |         |
| 50 |                                |         |
| 51 |                                |         |
| 52 |                                |         |
| 53 |                                |         |
| 54 |                                |         |
| 55 |                                |         |
| 56 |                                |         |
| 57 |                                |         |
| 58 |                                |         |
| 59 |                                |         |
| 60 |                                |         |

## Supplementary material

1  
2  
3  
4  
5  
6  
7  
8  
9  
10  
11  
12  
13  
14  
15  
16  
17  
18  
19  
20  
21  
22  
23  
24  
25  
26  
27  
28  
29  
30  
31  
32  
33  
34  
35  
36  
37  
38  
39  
40  
41  
42  
43  
44  
45  
46  
47  
48  
49  
50  
51  
52  
53  
54  
55  
56  
57  
58  
59  
60

|                                |         |
|--------------------------------|---------|
| NORETHINDRONE-ETHINYL ESTRAD   | 2187116 |
| NORETHINDRONE-ETHINYL ESTRAD   | 2189062 |
| ETHINYL ESTRADIOL/NORETH AC    | 2242531 |
| NORGESTREL-ETHINYL ESTRADIOL   | 340766  |
| NORGESTREL-ETHINYL ESTRADIOL   | 342815  |
| LEVONORGESTREL-ETH ESTRA       | 586609  |
| LEVONORGESTREL-ETH ESTRA       | 707503  |
| LEVONORGESTREL-ETH ESTRA       | 782424  |
| LEVONORGESTREL-ETH ESTRA       | 782440  |
| LEVONORGESTREL-ETH ESTRA       | 2042339 |
| NORGESTREL-ETHINYL ESTRADIOL   | 2043041 |
| LEVONORGESTREL-ETH ESTRA       | 2043734 |
| NORGESTIMATE-ETHINYL ESTRADIOL | 2258587 |
| LEVONORGESTREL-ETH ESTRA       | 2236975 |
| NORGESTIMATE-ETHINYL ESTRADIOL | 1968440 |
| NORGESTIMATE-ETHINYL ESTRADIOL | 2028700 |
| NORGESTIMATE-ETHINYL ESTRADIOL | 1992872 |
| NORGESTIMATE-ETHINYL ESTRADIOL | 2029421 |
| DESOGESTREL-ETHINYL ESTRADIOL  | 2042487 |
| DESOGESTREL-ETHINYL ESTRADIOL  | 2042541 |
| DESOGESTREL-ETHINYL ESTRADIOL  | 2042479 |
| DESOGESTREL-ETHINYL ESTRADIOL  | 2042533 |
| ESTRADIOL/NORETH AC            | 2241835 |
| ESTRADIOL/NORETH AC            | 2241837 |
| LEVONORGESTREL                 | 2241674 |
| ESTROGEN,CON/M-PROGEST ACET    | 2242878 |
| ESTROGEN,CON/M-PROGEST ACET    | 2242879 |
| ESTRADIOL/NORETH AC            | 2243529 |
| ESTRADIOL/NORETH AC            | 2243530 |
| ETHINYL ESTRADIOL/DROSPIRENONE | 2261723 |
| ETHINYL ESTRADIOL/DROSPIRENONE | 2261731 |
| ETONOGESTREL/ETHINYL ESTRADIOL | 2253186 |
| ETHINYL ESTRADIOL/NORELGEST    | 2248297 |
| DIENESTROL                     | 441295  |
| DIETHYLSTILBESTROL             | 3360    |
| DIETHYLSTILBESTROL             | 2091461 |
| DIETHYLSTILBESTROL             | 2091488 |
| ESTRADIOL                      | 464791  |
| ESTRADIOL                      | 2148587 |
| ESTRADIOL                      | 464805  |

## Supplementary material

1  
2  
3  
4  
5  
6  
7  
8  
9  
10  
11  
12  
13  
14  
15  
16  
17  
18  
19  
20  
21  
22  
23  
24  
25  
26  
27  
28  
29  
30  
31  
32  
33  
34  
35  
36  
37  
38  
39  
40  
41  
42  
43  
44  
45  
46  
47  
48  
49  
50  
51  
52  
53  
54  
55  
56  
57  
58  
59  
60

|                      |         |
|----------------------|---------|
| ESTRADIOL            | 2148595 |
| ESTRADIOL VALERATE   | 29238   |
| ESTRADIOL            | 756849  |
| ESTRADIOL            | 2237807 |
| ESTRADIOL            | 2243722 |
| ESTRADIOL            | 2245676 |
| ESTRADIOL            | 756857  |
| ESTRADIOL            | 2204428 |
| ESTRADIOL            | 2231509 |
| ESTRADIOL            | 2237808 |
| ESTRADIOL            | 2243724 |
| ESTRADIOL            | 2244000 |
| ESTRADIOL            | 2246967 |
| ESTRADIOL            | 756792  |
| ESTRADIOL            | 2204444 |
| ESTRADIOL            | 2231510 |
| ESTRADIOL            | 2244002 |
| ESTRADIOL            | 2246969 |
| ESTRADIOL            | 2168898 |
| ESTRADIOL            | 2204436 |
| ESTRADIOL            | 2244001 |
| ESTRADIOL            | 2246968 |
| ESTRADIOL            | 2225190 |
| ESTRADIOL            | 2204401 |
| ESTRADIOL            | 2238704 |
| ESTRADIOL            | 2243999 |
| ESTRADIOL            | 2241332 |
| ESTRADIOL            | 2247499 |
| ESTRADIOL            | 2247500 |
| ESTROGENS,CONJUGATED | 2569    |
| ESTROGENS,CONJUGATED | 2043394 |
| ESTROGENS,CONJUGATED | 2230891 |
| ESTROGENS,CONJUGATED | 2239654 |
| ESTROGENS,CONJUGATED | 2577    |
| ESTROGENS,CONJUGATED | 265470  |
| ESTROGENS,CONJUGATED | 587281  |
| ESTROGENS,CONJUGATED | 2043408 |
| ESTROGENS,CONJUGATED | 2089    |
| ESTROGENS,CONJUGATED | 2043440 |
| ESTROGENS,CONJUGATED | 403466  |

## Supplementary material

1  
2  
3  
4  
5  
6  
7  
8  
9  
10  
11  
12  
13  
14  
15  
16  
17  
18  
19  
20  
21  
22  
23  
24  
25  
26  
27  
28  
29  
30  
31  
32  
33  
34  
35  
36  
37  
38  
39  
40  
41  
42  
43  
44  
45  
46  
47  
48  
49  
50  
51  
52  
53  
54  
55  
56  
57  
58  
59  
60

|                                |          |
|--------------------------------|----------|
| ESTROGENS,CONJUGATED           | 2043416  |
| ESTROGENS,CONJUGATED           | 2230892  |
| ESTROGENS,CONJUGATED           | 2239655  |
| ESTROGENS,CONJUGATED           | 2585     |
| ESTROGENS,CONJUGATED           | 265489   |
| ESTROGENS,CONJUGATED           | 587303   |
| ESTROGENS,CONJUGATED           | 2043424  |
| ESTROGENS,CONJUGATED           | 2043432  |
| ESTROGENS,CONJUGATED           | 2043386  |
| ME-TESTOSTERONE/ESTROGEN,CON   | 53538    |
| ESTROPIPATE                    | 282685   |
| ESTROPIPATE                    | 2089769  |
| ESTROPIPATE                    | 282677   |
| ESTROPIPATE                    | 2089777  |
| ESTROPIPATE                    | 2089793  |
| ESTRADIOL/NORETH AC            | 2108186  |
| NORGESTIMATE-ETHINYL ESTRADIOL | 2229064  |
| NORGESTIMATE-ETHINYL ESTRADIOL | 2229218  |
| NORGESTIMATE-ETHINYL ESTRADIOL | 2229226  |
| ETHINYL ESTRADIOL/CYPROTERONE  | 2233542  |
| ETHINYL ESTRADIOL/NORELGEST    | 2246340  |
| NO GENERIC FORMULARY           | 66124057 |
| NO GENERIC FORMULARY           | 66124058 |
| NO GENERIC FORMULARY           | 66124060 |
| NO GENERIC FORMULARY           | 66124061 |
| NO GENERIC FORMULARY           | 66124062 |
| NO GENERIC FORMULARY           | 66124063 |
| NO GENERIC FORMULARY           | 66124064 |

---

**Progestogens**

---

**Progesterone**

---

|                          |          |
|--------------------------|----------|
| PROGESTERONE,MICRONIZED  | 2241013  |
| MEDROXYPROGESTERONE ACET | 30848    |
| MEDROXYPROGESTERONE ACET | 30856    |
| MEDROXYPROGESTERONE ACET | 585092   |
| NO GENERIC FORMULARY     | 66123240 |
| MEDROXYPROGESTERONE ACET | 708917   |
| MEDROXYPROGESTERONE ACET | 2148552  |
| MEDROXYPROGESTERONE ACET | 2221284  |
| MEDROXYPROGESTERONE ACET | 2229838  |
| MEDROXYPROGESTERONE ACET | 2244726  |

## Supplementary material

|    |                               |         |
|----|-------------------------------|---------|
| 1  |                               |         |
| 2  |                               |         |
| 3  | MEDROXYPROGESTERONE ACET      | 2246627 |
| 4  | MEDROXYPROGESTERONE ACET      | 30937   |
| 5  | MEDROXYPROGESTERONE ACET      | 2010739 |
| 6  | MEDROXYPROGESTERONE ACET      | 2148560 |
| 7  | MEDROXYPROGESTERONE ACET      | 2221292 |
| 8  | MEDROXYPROGESTERONE ACET      | 2229839 |
| 9  | MEDROXYPROGESTERONE ACET      | 2244727 |
| 10 | MEDROXYPROGESTERONE ACET      | 2246628 |
| 11 | MEDROXYPROGESTERONE ACET      | 729973  |
| 12 | MEDROXYPROGESTERONE ACET      | 2010933 |
| 13 | MEDROXYPROGESTERONE ACET      | 2148579 |
| 14 | MEDROXYPROGESTERONE ACET      | 2221306 |
| 15 | MEDROXYPROGESTERONE ACET      | 2229840 |
| 16 | MEDROXYPROGESTERONE ACET      | 2246629 |
| 17 | MEDROXYPROGESTERONE ACET      | 30945   |
| 18 | MEDROXYPROGESTERONE ACET      | 2267640 |
| 19 | MEDROXYPROGESTERONE ACET      | 2267640 |
| 20 | MEDROXYPROGESTERONE ACET      | 2267640 |
| 21 | MEDROXYPROGESTERONE ACET      | 2267640 |
| 22 | MEDROXYPROGESTERONE ACET      | 2267640 |
| 23 | MEDROXYPROGESTERONE ACET      | 2267640 |
| 24 | MEDROXYPROGESTERONE ACET      | 2267640 |
| 25 | MEDROXYPROGESTERONE ACET      | 2267640 |
| 26 | MEDROXYPROGESTERONE ACET      | 2267640 |
| 27 | MEDROXYPROGESTERONE ACET      | 2267640 |
| 28 | MEDROXYPROGESTERONE ACET      | 2267640 |
| 29 | MEDROXYPROGESTERONE ACET      | 2267640 |
| 30 | MEDROXYPROGESTERONE ACET      | 2267640 |
| 31 | MEDROXYPROGESTERONE ACET      | 2267640 |
| 32 | MEDROXYPROGESTERONE ACET      | 2267640 |
| 33 | <b>Transmasculine</b>         |         |
| 34 | <b>Testosterone</b>           |         |
| 35 | TESTOSTERONE                  | 2249499 |
| 36 | TESTOSTERONE CYPIONATE        | 30783   |
| 37 | TESTOSTERONE PROPIONATE       | 1977571 |
| 38 | TESTOSTERONE CYPIONATE        | 1977601 |
| 39 | TESTOSTERONE CYPIONATE        | 2220318 |
| 40 | TESTOSTERONE CYPIONATE        | 2246063 |
| 41 | TESTOSTERONE ENANTHATE        | 29246   |
| 42 | TESTOSTERONE ENANTHATE        | 716936  |
| 43 | TESTOSTERONE ENANTHATE        | 739944  |
| 44 | TESTOSTERONE UNDECANOATE      | 782327  |
| 45 | TESTOSTERONE ENANTHATE/ESTRAD | 108278  |
| 46 | TESTOSTERONE ENANTHATE/ESTRAD | 2061031 |
| 47 | TESTOSTERONE                  | 2239653 |
| 48 | TESTOSTERONE                  | 2245346 |
| 49 | TESTOSTERONE                  | 2245345 |
| 50 | TESTOSTERONE                  | 2245972 |
| 51 |                               |         |
| 52 |                               |         |
| 53 |                               |         |
| 54 |                               |         |
| 55 |                               |         |
| 56 |                               |         |
| 57 |                               |         |
| 58 |                               |         |
| 59 |                               |         |
| 60 |                               |         |



## Supplementary material

**Chronic condition case definitions**

| <b>Chronic condition</b> |                             | <b>Case definition</b>                                                                                                                                                                                                                                                                                                                                                                  | <b>Codes</b>                                                                                                                                                                                                                                                                                                          |
|--------------------------|-----------------------------|-----------------------------------------------------------------------------------------------------------------------------------------------------------------------------------------------------------------------------------------------------------------------------------------------------------------------------------------------------------------------------------------|-----------------------------------------------------------------------------------------------------------------------------------------------------------------------------------------------------------------------------------------------------------------------------------------------------------------------|
| Cardiovascular disease*  | Acute myocardial infarction | 1 or more hospitalizations with relevant ICD codes                                                                                                                                                                                                                                                                                                                                      | ICD-10:<br>I21 Acute myocardial infarction<br>I22 Subsequent myocardial infarction                                                                                                                                                                                                                                    |
|                          | Ischemic heart disease      | At least one of the following:<br><br>2 medical visits with Angina ICD-9 code 413 plus 1 heart disease prescription in 365 days; or 1 specialist visit with Angina ICD-9 code 413 plus 1 prescription in 365 days; or 2 medical visits with two ICD9 codes 410, 411, 412, 413, 414 in 365 days; or 1 CCI/CCP CABG,PCI/PCTA procedure code; or 1 hospitalization with relevant ICD code. | ICD-9:<br>410 Acute myocardial infarction<br>ICD-10:<br>I20 Angina pectoris<br>I21 Acute myocardial infarction I<br>22 Subsequent myocardial infarction<br>I23 Certain current complications following acute myocardial infarction<br>I24 Other acute ischaemic heart diseases<br>I25 Chronic ischaemic heart disease |
|                          | Chronic heart failure       | 1 or more hospitalizations or 2 or more medical visits in 365 days with relevant ICD codes                                                                                                                                                                                                                                                                                              | ICD-9:<br>410 Acute myocardial infarction<br>411 Other acute and subacute forms of ischaemic heart disease<br>412 Old myocardial infarction<br>413 Angina pectoris<br>414 Other forms of chronic ischaemic heart disease<br>ICD-10:<br>I50 Heart failure                                                              |
|                          | Stroke- hospital            | 1 or more hospitalizations with relevant ICD codes                                                                                                                                                                                                                                                                                                                                      | ICD-9:<br>428 Heart failure<br>ICD-10:<br>H34.1 Central retinal artery occlusion<br>I60 Subarachnoid hemorrhage<br>I61 Intracerebral haemorrhage<br>I63 Cerebral infarction (exclude<br>I63.6 Cerebral infarction due to                                                                                              |

## Supplementary material

cerebral venous thrombosis, nonpyogenic)  
 I64 Stroke, not specified as haemorrhage or infarction  
 362.3 Retinal vascular occlusion  
 430 Subarachnoid hemorrhage  
 431 Intracerebral hemorrhage  
 433.x1 Occlusion and stenosis of precerebral arteries  
 434.x Occlusion cerebral arteries  
 436 Acute but ill-defined cerebrovascular disease

*Excludes any traumatic brain injury*

Transient ischemic attack

1 or more hospitalizations with relevant ICD codes

ICD-10:  
 H34.0 Transient retinal artery occlusion  
 G45.0 Vertebro-basilar artery syndrome  
 G45.1 Carotid artery syndrome (hemispheric)  
 G45.2 Multiple and bilateral precerebral artery syndromes  
 G45.3 Amaurosis fugax  
 G45.8 Other transient cerebral ischemic attacks and related syndromes  
 G45.9 Transient cerebral ischemic attack, unspecified

ICD-9:

435 Transient cerebral ischemia

*Excludes any traumatic brain injury*

Chronic kidney disease\*

1 or more hospitalizations or 2 or more medical visits in 365 days with relevant ICD codes

ICD-10:  
 N01 Rapidly progressive nephritic syndrome  
 N03 Chronic nephritic syndrome  
 N04 Nephrotic syndrome  
 N05 Unspecified nephritic syndrome  
 N06 Isolated proteinuria with specified morphological lesion  
 N07 Hereditary nephropathy, not elsewhere classified

## Supplementary material

N18 Chronic kidney disease  
 N19 Unspecified kidney failure  
 N26 Unspecified contracted  
 kidney  
 N27 Small kidney of unknown  
 cause

## ICD-9:

581 Nephrotic syndrome 582  
 Chronic glomerulonephritis  
 583 Nephritis and nephropathy,  
 not specified as acute or chronic  
 585 Chronic renal failure 586  
 Renal failure, unspecified  
 587 Renal sclerosis, unspecified  
 589 Small kidney of unknown  
 cause

Chronic liver disease

1 or more  
 hospitalization or  
 medical visit with  
 relevant diagnosis  
 within 365 days

## ICD-9:

571.0 Alcoholic fatty liver  
 571.2 Alcoholic cirrhosis of liver  
 571.3 Alcoholic liver damage,  
 unspecified  
 571.4 Chronic hepatitis  
 571.5 Cirrhosis of liver without  
 mention of alcohol  
 571.6 Billiary cirrhosis  
 571.8 Other chronic nonalcoholic  
 liver disease  
 571.9 Unspecified chronic liver  
 disease without mention of  
 alcohol  
 070.3 Viral hepatitis B without  
 mention of hepatic coma  
 070.30 Viral hepatitis B without  
 mention of hepatic coma, acute or  
 unspecified, without mention of  
 hepatitis delta  
 070.31 Viral hepatitis B without  
 mention of hepatic coma, acute or  
 unspecified, with hepatitis delta  
 070.32 Viral hepatitis B without  
 mention of hepatic coma, chronic,  
 without mention of hepatitis delta  
 070.33 Viral hepatitis B without  
 mention of hepatic coma, chronic,  
 with hepatitis delta

## Supplementary material

070.52 Hepatitis delta without  
mention of active Hepatitis B  
disease or hepatic coma  
V02.61 Hepatitis B carrier  
070.42 Hepatitis delta without  
mention of active Hepatitis B  
disease with hepatic coma  
070.54 Chronic hepatitis C  
without mention of hepatic coma  
V02.62 Hepatitis C carrier

ICD-10:  
J41 Simple and mucopurulent  
chronic bronchitis  
J42 Unspecified chronic  
bronchitis  
J43 Emphysema  
J44 Other chronic obstructive  
pulmonary disease

ICD-9:  
491 Chronic bronchitis  
492 Emphysema  
496 Chronic airways obstruction,  
not elsewhere classified

ICD-10:  
E10 Type 1 diabetes mellitus  
E11 Type 2 diabetes mellitus  
E13 Other specified diabetes  
mellitus  
E14 Unspecified diabetes mellitus

ICD-9:  
250 Diabetes mellitus

Chronic Obstructive  
Pulmonary Disease\*

1 or more  
hospitalization or 2 or  
more medical visits  
within 365 days

Diabetes Mellitus\*

At least 1 of the  
following:  
  
1 hospitalization or 2  
medical visits in 365  
days with relevant ICD  
codes; or 2 or more  
insulin prescriptions in  
365 days; or 2 or more  
oral antihyperglycemic  
(not including  
metformin)  
prescriptions in 365  
days; or 1 insulin and 1  
oral antihyperglycemic  
(including metformin)  
in 365 days; or 2  
metformin  
prescriptions and 1  
medical visit in one  
year with relevant ICD  
codes.

## Supplementary material

## Hypertension\*

*Excludes gestational diabetes.*

1 or more hospitalizations or 2 or more medical visits within 2 years with relevant ICD codes.

*Excludes gestational hypertension.*

## ICD-10:

I10 Essential (primary) hypertension  
I11 Hypertensive heart disease  
I12 Hypertensive renal disease  
I13 Hypertensive heart and renal disease  
I15 Secondary hypertension

## ICD-9:

401 Essential hypertension  
402 Hypertensive heart disease  
403 Hypertensive renal disease  
404 Hypertensive heart and renal disease  
405 Secondary hypertension

## Mood and anxiety disorders\*

1 or more hospitalizations with a relevant ICD code or 2 or more medical visits with a relevant code within 2 years

## ICD-10:

F30 Manic episode  
F31 Bipolar affective disorder  
F32 Depressive episode  
F33 Recurrent depressive disorder  
F34 Persistent mood [affective] disorders  
F38 Other mood [affective] disorders  
F39 Unspecified mood [affective] disorder  
F40 Phobic anxiety disorders  
F41 Other anxiety disorders  
F42 Obsessive-compulsive disorder  
F43 Reaction to severe stress, and adjustment disorders  
F44 Dissociative (conversion) disorders  
F45 Somatoform disorders  
F48 Other neurotic disorders  
F68 Other disorders of adult personality & behavior

## ICD-9:

## Supplementary material

296 Affective psychoses 300  
Neurotic disorders 311 Depressive  
disorder, not elsewhere classified

MSP DX Code:  
50B Anxiety/Depression  
*Cancer case definition details  
available from the British  
Columbia Cancer Agency:  
[http://www.bccancer.bc.ca/health-  
info/types-of-cancer](http://www.bccancer.bc.ca/health-info/types-of-cancer)*

Non-AIDS defining  
cancer† All prevalent cancer  
cases were included,  
with the exception of  
AIDS defining  
malignancies  
(Kaposi's sarcoma,  
non-Hodgkin's  
lymphoma, invasive  
cervical cancer)

Organic mental  
disorders 1 or more medical  
visits or  
hospitalizations with  
relevant diagnoses  
within 365 days

ICD-9:  
290.x Dementias  
294.x Other organic psychotic  
conditions  
331.x Alzheimer's

ICD-10:  
F00.x Dementia in Alzheimer's  
disease  
F01.x Vascular Dementia  
F02.x Dementia in other disease  
classified elsewhere  
F03.x Unspecified dementia  
F04 Amnesic disorder due to  
physiological condition  
F06 Other mental disorders due to  
known physiological condition  
F09 Unspecified mental disorder  
due to known physiological  
condition  
G30 Alzheimer's disease with  
early onset

Osteoarthritis\* 1 or more  
hospitalization or 2 or  
more medical visits in  
365 days with a  
relevant ICD code

ICD-10:  
M15 Polyarthrosis  
M16 Coxarthrosis [arthrosis of  
hip]  
M17 Gonarthrosis [arthrosis of  
knee]  
M18 Arthrosis of first  
carpometacarpal joint  
M19 Other arthrosis

## Supplementary material

|    |                       |                          |                                    |
|----|-----------------------|--------------------------|------------------------------------|
| 1  |                       |                          |                                    |
| 2  |                       |                          |                                    |
| 3  |                       |                          |                                    |
| 4  |                       |                          |                                    |
| 5  |                       |                          | ICD-9:                             |
| 6  |                       |                          | 715 Osteoarthritis and allied      |
| 7  |                       |                          | disorders                          |
| 8  | Personality disorder  | 1 or more                | ICD-9:                             |
| 9  |                       | hospitalizations or      | 301.x Personality disorders        |
| 10 |                       | medical visits with a    |                                    |
| 11 |                       | relevant diagnosis       | ICD-10:                            |
| 12 |                       | within 365 days          | F60.x Specified personality        |
| 13 |                       |                          | disorders                          |
| 14 |                       |                          | F62 Enduring personality           |
| 15 |                       |                          | changes, not attributable to brain |
| 16 |                       |                          | damage and disease                 |
| 17 |                       |                          | F68.1 Intentional production or    |
| 18 |                       |                          | feigning of symptoms or            |
| 19 |                       |                          | disabilities, either physical or   |
| 20 |                       |                          | psychological                      |
| 21 |                       |                          | F68.8 Other specified disorders or |
| 22 |                       |                          | adult personality and behaviour    |
| 23 |                       |                          | F69 Unspecified disorder or adult  |
| 24 |                       |                          | personality and behaviour          |
| 25 |                       |                          | ICD-9:                             |
| 26 |                       |                          | 295.x Schizophrenic disorders      |
| 27 | Schizophrenia related | 1 or more medical visit  | 297.0 Paranoid state, simple       |
| 28 | disorder              | or hospitalizations with | 297.1 Delusional disorder          |
| 29 |                       | relevant diagnoses       | 297.2 Paraphrenia                  |
| 30 |                       | within 365 days          | 297.3 Shared psychotic disorder    |
| 31 |                       |                          |                                    |
| 32 |                       |                          | ICD-10:                            |
| 33 |                       |                          | F20.x Paranoid schizophrenia       |
| 34 |                       |                          | F21.x Schizotypal disorder         |
| 35 |                       |                          | F23.2 Acute schizophrenia-like     |
| 36 |                       |                          | psychotic disorder                 |
| 37 |                       |                          | F25.x Schizoaffective disorders    |
| 38 |                       |                          |                                    |
| 39 |                       |                          |                                    |
| 40 |                       |                          |                                    |
| 41 |                       |                          |                                    |
| 42 |                       |                          |                                    |
| 43 |                       |                          |                                    |
| 44 |                       |                          |                                    |
| 45 |                       |                          |                                    |
| 46 |                       |                          |                                    |
| 47 |                       |                          |                                    |
| 48 |                       |                          |                                    |
| 49 |                       |                          |                                    |
| 50 |                       |                          |                                    |
| 51 |                       |                          |                                    |
| 52 |                       |                          |                                    |
| 53 |                       |                          |                                    |
| 54 |                       |                          |                                    |
| 55 |                       |                          |                                    |
| 56 |                       |                          |                                    |
| 57 |                       |                          |                                    |
| 58 |                       |                          |                                    |
| 59 |                       |                          |                                    |
| 60 |                       |                          |                                    |

\* Case definition adapted from British Columbia Ministry of Health version 2017, April 4 2019 update

† Case-definition adapted from British Columbia Cancer Agency

**The RECORD statement – checklist of items, extended from the STROBE statement, that should be reported in observational studies using routinely collected health data.**

|                           | Item No. | STROBE items                                                                                                                                                                               | Location in manuscript where items are reported | RECORD items                                                                                                                                                                                                                                                                                                                                                                                                                                | Location in manuscript where items are reported |
|---------------------------|----------|--------------------------------------------------------------------------------------------------------------------------------------------------------------------------------------------|-------------------------------------------------|---------------------------------------------------------------------------------------------------------------------------------------------------------------------------------------------------------------------------------------------------------------------------------------------------------------------------------------------------------------------------------------------------------------------------------------------|-------------------------------------------------|
| <b>Title and abstract</b> |          |                                                                                                                                                                                            |                                                 |                                                                                                                                                                                                                                                                                                                                                                                                                                             |                                                 |
|                           | 1        | (a) Indicate the study's design with a commonly used term in the title or the abstract (b) Provide in the abstract an informative and balanced summary of what was done and what was found |                                                 | RECORD 1.1: The type of data used should be specified in the title or abstract. When possible, the name of the databases used should be included.<br><br>RECORD 1.2: If applicable, the geographic region and timeframe within which the study took place should be reported in the title or abstract.<br><br>RECORD 1.3: If linkage between databases was conducted for the study, this should be clearly stated in the title or abstract. | 1.1-3: Title page                               |
| <b>Introduction</b>       |          |                                                                                                                                                                                            |                                                 |                                                                                                                                                                                                                                                                                                                                                                                                                                             |                                                 |
| Background rationale      | 2        | Explain the scientific background and rationale for the investigation being reported                                                                                                       |                                                 |                                                                                                                                                                                                                                                                                                                                                                                                                                             | Introduction (pp 4-5)                           |
| Objectives                | 3        | State specific objectives, including any prespecified hypotheses                                                                                                                           |                                                 |                                                                                                                                                                                                                                                                                                                                                                                                                                             | Introduction (page 5)                           |
| <b>Methods</b>            |          |                                                                                                                                                                                            |                                                 |                                                                                                                                                                                                                                                                                                                                                                                                                                             |                                                 |
| Study Design              | 4        | Present key elements of study design early in the paper                                                                                                                                    |                                                 |                                                                                                                                                                                                                                                                                                                                                                                                                                             | Methods (page 5); Supplementary Material        |
| Setting                   | 5        | Describe the setting, locations, and relevant dates, including periods of recruitment, exposure, follow-up, and data collection                                                            |                                                 |                                                                                                                                                                                                                                                                                                                                                                                                                                             | Methods (page 5)                                |



|                                                                                                                                                                                                            |          |                                                                                                                                                                                                                                                                                                                                                                                                                                                                                                                                                                                                                                                                                                                        |  |                                                                                                                                                                                                                                                                                                                                                                                                                                                                                                                                                                                                                                                                                                      |                                                                                                            |
|------------------------------------------------------------------------------------------------------------------------------------------------------------------------------------------------------------|----------|------------------------------------------------------------------------------------------------------------------------------------------------------------------------------------------------------------------------------------------------------------------------------------------------------------------------------------------------------------------------------------------------------------------------------------------------------------------------------------------------------------------------------------------------------------------------------------------------------------------------------------------------------------------------------------------------------------------------|--|------------------------------------------------------------------------------------------------------------------------------------------------------------------------------------------------------------------------------------------------------------------------------------------------------------------------------------------------------------------------------------------------------------------------------------------------------------------------------------------------------------------------------------------------------------------------------------------------------------------------------------------------------------------------------------------------------|------------------------------------------------------------------------------------------------------------|
| <p>1<br/>2<br/>3<br/>4<br/>5<br/>6<br/>7<br/>8<br/>9<br/>10<br/>11<br/>12<br/>13<br/>14<br/>15<br/>16<br/>17<br/>18<br/>19<br/>20<br/>21<br/>22<br/>23<br/>24<br/>25<br/>26<br/>27</p> <p>Participants</p> | <p>6</p> | <p>(a) <i>Cohort study</i> - Give the eligibility criteria, and the sources and methods of selection of participants. Describe methods of follow-up<br/> <i>Case-control study</i> - Give the eligibility criteria, and the sources and methods of case ascertainment and control selection. Give the rationale for the choice of cases and controls<br/> <i>Cross-sectional study</i> - Give the eligibility criteria, and the sources and methods of selection of participants</p> <p>(b) <i>Cohort study</i> - For matched studies, give matching criteria and number of exposed and unexposed<br/> <i>Case-control study</i> - For matched studies, give matching criteria and the number of controls per case</p> |  | <p>RECORD 6.1: The methods of study population selection (such as codes or algorithms used to identify subjects) should be listed in detail. If this is not possible, an explanation should be provided.</p> <p>RECORD 6.2: Any validation studies of the codes or algorithms used to select the population should be referenced. If validation was conducted for this study and not published elsewhere, detailed methods and results should be provided.</p> <p>RECORD 6.3: If the study involved linkage of databases, consider use of a flow diagram or other graphical display to demonstrate the data linkage process, including the number of individuals with linked data at each stage.</p> | <p>6.1: Methods (pp 6-7);<br/>Supplementary Material</p> <p>6.2: Methods (pp 6-7)</p> <p>6.3: Figure 1</p> |
| <p>28<br/>29<br/>30<br/>31<br/>32<br/>33<br/>34</p> <p>Variables</p>                                                                                                                                       | <p>7</p> | <p>Clearly define all outcomes, exposures, predictors, potential confounders, and effect modifiers. Give diagnostic criteria, if applicable.</p>                                                                                                                                                                                                                                                                                                                                                                                                                                                                                                                                                                       |  | <p>RECORD 7.1: A complete list of codes and algorithms used to classify exposures, outcomes, confounders, and effect modifiers should be provided. If these cannot be reported, an explanation should be provided.</p>                                                                                                                                                                                                                                                                                                                                                                                                                                                                               | <p>7.1: Methods (pp 6-7);<br/>Supplementary Material</p>                                                   |
| <p>35<br/>36<br/>37<br/>38<br/>39<br/>40<br/>41<br/>42</p> <p>Data sources/<br/>measurement</p>                                                                                                            | <p>8</p> | <p>For each variable of interest, give sources of data and details of methods of assessment (measurement). Describe comparability of assessment methods if there is more than one group</p>                                                                                                                                                                                                                                                                                                                                                                                                                                                                                                                            |  |                                                                                                                                                                                                                                                                                                                                                                                                                                                                                                                                                                                                                                                                                                      | <p>Methods (pp 6-7)</p>                                                                                    |

|                                                                                                                                              |                                  |    |                                                                                                                                                                                                                                                                                                                                                                                                                                                                                                                                                                      |  |                                                                                                                                                       |                            |
|----------------------------------------------------------------------------------------------------------------------------------------------|----------------------------------|----|----------------------------------------------------------------------------------------------------------------------------------------------------------------------------------------------------------------------------------------------------------------------------------------------------------------------------------------------------------------------------------------------------------------------------------------------------------------------------------------------------------------------------------------------------------------------|--|-------------------------------------------------------------------------------------------------------------------------------------------------------|----------------------------|
| 1<br>2<br>3<br>4<br>5<br>6<br>7<br>8<br>9<br>10                                                                                              | Bias                             | 9  | Describe any efforts to address potential sources of bias                                                                                                                                                                                                                                                                                                                                                                                                                                                                                                            |  |                                                                                                                                                       | Discussion (pp 9, 11)      |
| 11<br>12<br>13<br>14<br>15<br>16<br>17<br>18<br>19<br>20<br>21<br>22<br>23<br>24<br>25<br>26<br>27<br>28<br>29<br>30<br>31<br>32<br>33<br>34 | Study size                       | 10 | Explain how the study size was arrived at                                                                                                                                                                                                                                                                                                                                                                                                                                                                                                                            |  |                                                                                                                                                       | Methods (page 6); Figure 1 |
| 35<br>36<br>37<br>38<br>39<br>40<br>41<br>42<br>43<br>44<br>45<br>46<br>47                                                                   | Quantitative variables           | 11 | Explain how quantitative variables were handled in the analyses. If applicable, describe which groupings were chosen, and why                                                                                                                                                                                                                                                                                                                                                                                                                                        |  |                                                                                                                                                       | Methods (pp 6-7)           |
|                                                                                                                                              | Statistical methods              | 12 | (a) Describe all statistical methods, including those used to control for confounding<br>(b) Describe any methods used to examine subgroups and interactions<br>(c) Explain how missing data were addressed<br>(d) <i>Cohort study</i> - If applicable, explain how loss to follow-up was addressed<br><i>Case-control study</i> - If applicable, explain how matching of cases and controls was addressed<br><i>Cross-sectional study</i> - If applicable, describe analytical methods taking account of sampling strategy<br>(e) Describe any sensitivity analyses |  |                                                                                                                                                       | Methods (pp 6-7)           |
|                                                                                                                                              | Data access and cleaning methods |    | ..                                                                                                                                                                                                                                                                                                                                                                                                                                                                                                                                                                   |  | RECORD 12.1: Authors should describe the extent to which the investigators had access to the database population used to create the study population. | 12.1-2: Methods            |

|                  |    |                                                                                                                                                                                                                                                                                                                                                 |  |                                                                                                                                                                                                                                                                                                                    |                               |
|------------------|----|-------------------------------------------------------------------------------------------------------------------------------------------------------------------------------------------------------------------------------------------------------------------------------------------------------------------------------------------------|--|--------------------------------------------------------------------------------------------------------------------------------------------------------------------------------------------------------------------------------------------------------------------------------------------------------------------|-------------------------------|
|                  |    |                                                                                                                                                                                                                                                                                                                                                 |  | RECORD 12.2: Authors should provide information on the data cleaning methods used in the study.                                                                                                                                                                                                                    |                               |
| Linkage          |    | ..                                                                                                                                                                                                                                                                                                                                              |  | RECORD 12.3: State whether the study included person-level, institutional-level, or other data linkage across two or more databases. The methods of linkage and methods of linkage quality evaluation should be provided.                                                                                          | Methods (page 5)              |
| <b>Results</b>   |    |                                                                                                                                                                                                                                                                                                                                                 |  |                                                                                                                                                                                                                                                                                                                    |                               |
| Participants     | 13 | (a) Report the numbers of individuals at each stage of the study ( <i>e.g.</i> , numbers potentially eligible, examined for eligibility, confirmed eligible, included in the study, completing follow-up, and analysed)<br>(b) Give reasons for non-participation at each stage.<br>(c) Consider use of a flow diagram                          |  | RECORD 13.1: Describe in detail the selection of the persons included in the study ( <i>i.e.</i> , study population selection) including filtering based on data quality, data availability and linkage. The selection of included persons can be described in the text and/or by means of the study flow diagram. | Results (page 8);<br>Figure 1 |
| Descriptive data | 14 | (a) Give characteristics of study participants ( <i>e.g.</i> , demographic, clinical, social) and information on exposures and potential confounders<br>(b) Indicate the number of participants with missing data for each variable of interest<br>(c) <i>Cohort study</i> - summarise follow-up time ( <i>e.g.</i> , average and total amount) |  |                                                                                                                                                                                                                                                                                                                    | Results (page 8)              |
| Outcome data     | 15 | <i>Cohort study</i> - Report numbers of outcome events or summary measures over time<br><i>Case-control study</i> - Report numbers in each exposure                                                                                                                                                                                             |  |                                                                                                                                                                                                                                                                                                                    | Results                       |

|                   |    |                                                                                                                                                                                                                                                                                                                                                                                                                 |  |                                                                                                                                                                                                                                                                                                          |                             |
|-------------------|----|-----------------------------------------------------------------------------------------------------------------------------------------------------------------------------------------------------------------------------------------------------------------------------------------------------------------------------------------------------------------------------------------------------------------|--|----------------------------------------------------------------------------------------------------------------------------------------------------------------------------------------------------------------------------------------------------------------------------------------------------------|-----------------------------|
|                   |    | category, or summary measures of exposure<br><i>Cross-sectional study</i> - Report numbers of outcome events or summary measures                                                                                                                                                                                                                                                                                |  |                                                                                                                                                                                                                                                                                                          |                             |
| Main results      | 16 | (a) Give unadjusted estimates and, if applicable, confounder-adjusted estimates and their precision (e.g., 95% confidence interval). Make clear which confounders were adjusted for and why they were included<br>(b) Report category boundaries when continuous variables were categorized<br>(c) If relevant, consider translating estimates of relative risk into absolute risk for a meaningful time period |  |                                                                                                                                                                                                                                                                                                          | NA                          |
| Other analyses    | 17 | Report other analyses done— e.g., analyses of subgroups and interactions, and sensitivity analyses                                                                                                                                                                                                                                                                                                              |  |                                                                                                                                                                                                                                                                                                          | NA                          |
| <b>Discussion</b> |    |                                                                                                                                                                                                                                                                                                                                                                                                                 |  |                                                                                                                                                                                                                                                                                                          |                             |
| Key results       | 18 | Summarise key results with reference to study objectives                                                                                                                                                                                                                                                                                                                                                        |  |                                                                                                                                                                                                                                                                                                          | Discussion: Page 9          |
| Limitations       | 19 | Discuss limitations of the study, taking into account sources of potential bias or imprecision. Discuss both direction and magnitude of any potential bias                                                                                                                                                                                                                                                      |  | RECORD 19.1: Discuss the implications of using data that were not created or collected to answer the specific research question(s). Include discussion of misclassification bias, unmeasured confounding, missing data, and changing eligibility over time, as they pertain to the study being reported. | Discussion: Page 9, Page 11 |
| Interpretation    | 20 | Give a cautious overall interpretation of results considering objectives,                                                                                                                                                                                                                                                                                                                                       |  |                                                                                                                                                                                                                                                                                                          | Conclusion (Page 11)        |

|                                                           |    |                                                                                                                                                               |  |                                                                                                                                                          |                      |
|-----------------------------------------------------------|----|---------------------------------------------------------------------------------------------------------------------------------------------------------------|--|----------------------------------------------------------------------------------------------------------------------------------------------------------|----------------------|
|                                                           |    | limitations, multiplicity of analyses, results from similar studies, and other relevant evidence                                                              |  |                                                                                                                                                          |                      |
| Generalisability                                          | 21 | Discuss the generalisability (external validity) of the study results                                                                                         |  |                                                                                                                                                          | Limitations (Page 9) |
| <b>Other Information</b>                                  |    |                                                                                                                                                               |  |                                                                                                                                                          |                      |
| Funding                                                   | 22 | Give the source of funding and the role of the funders for the present study and, if applicable, for the original study on which the present article is based |  |                                                                                                                                                          | Funding (Page 12)    |
| Accessibility of protocol, raw data, and programming code |    | ..                                                                                                                                                            |  | RECORD 22.1: Authors should provide information on how to access any supplemental information such as the study protocol, raw data, or programming code. | Page 12              |

\*Reference: Benchimol EI, Smeeth L, Guttman A, Harron K, Moher D, Petersen I, Sørensen HT, von Elm E, Langan SM, the RECORD Working Committee. The REporting of studies Conducted using Observational Routinely-collected health Data (RECORD) Statement. *PLoS Medicine* 2015; in press.

\*Checklist is protected under Creative Commons Attribution ([CC BY](https://creativecommons.org/licenses/by/4.0/)) license.

# BMJ Open

## Development of a computable phenotype to identify a transgender sample for health research purposes: A feasibility study in a large linked provincial healthcare administrative cohort in British Columbia, Canada

|                                 |                                                                                                                                                                                                                                                                                                                                                                                                                                                                                                                                                                                     |
|---------------------------------|-------------------------------------------------------------------------------------------------------------------------------------------------------------------------------------------------------------------------------------------------------------------------------------------------------------------------------------------------------------------------------------------------------------------------------------------------------------------------------------------------------------------------------------------------------------------------------------|
| Journal:                        | <i>BMJ Open</i>                                                                                                                                                                                                                                                                                                                                                                                                                                                                                                                                                                     |
| Manuscript ID                   | bmjopen-2020-040928.R3                                                                                                                                                                                                                                                                                                                                                                                                                                                                                                                                                              |
| Article Type:                   | Original research                                                                                                                                                                                                                                                                                                                                                                                                                                                                                                                                                                   |
| Date Submitted by the Author:   | 03-Mar-2021                                                                                                                                                                                                                                                                                                                                                                                                                                                                                                                                                                         |
| Complete List of Authors:       | Rich, Ashleigh; The University of British Columbia, School of Population & Public Health; BC Centre for Excellence in HIV/AIDS, Poteat, Tonia; University of North Carolina at Chapel Hill, Department of Social Medicine<br>Koehoorn, Mieke; University of British Columbia, School of Population and Public Health;<br>Li, Jenny; BC Centre for Excellence in HIV/AIDS,<br>Ye, Monica; BC Centre for Excellence in HIV/AIDS,<br>Sereda, Paul; British Columbia Centre for Excellence in HIV/AIDS,<br>Salway, Travis; Simon Fraser University<br>Hogg, R; Simon Fraser University, |
| <b>Primary Subject Heading</b>: | Epidemiology                                                                                                                                                                                                                                                                                                                                                                                                                                                                                                                                                                        |
| Secondary Subject Heading:      | HIV/AIDS, Health services research, Research methods, Public health                                                                                                                                                                                                                                                                                                                                                                                                                                                                                                                 |
| Keywords:                       | EPIDEMIOLOGY, PUBLIC HEALTH, Sexual and gender disorders < PSYCHIATRY, HIV & AIDS < INFECTIOUS DISEASES, SOCIAL MEDICINE                                                                                                                                                                                                                                                                                                                                                                                                                                                            |
|                                 |                                                                                                                                                                                                                                                                                                                                                                                                                                                                                                                                                                                     |

SCHOLARONE™  
Manuscripts



I, the Submitting Author has the right to grant and does grant on behalf of all authors of the Work (as defined in the below author licence), an exclusive licence and/or a non-exclusive licence for contributions from authors who are: i) UK Crown employees; ii) where BMJ has agreed a CC-BY licence shall apply, and/or iii) in accordance with the terms applicable for US Federal Government officers or employees acting as part of their official duties; on a worldwide, perpetual, irrevocable, royalty-free basis to BMJ Publishing Group Ltd ("BMJ") its licensees and where the relevant Journal is co-owned by BMJ to the co-owners of the Journal, to publish the Work in this journal and any other BMJ products and to exploit all rights, as set out in our [licence](#).

The Submitting Author accepts and understands that any supply made under these terms is made by BMJ to the Submitting Author unless you are acting as an employee on behalf of your employer or a postgraduate student of an affiliated institution which is paying any applicable article publishing charge ("APC") for Open Access articles. Where the Submitting Author wishes to make the Work available on an Open Access basis (and intends to pay the relevant APC), the terms of reuse of such Open Access shall be governed by a Creative Commons licence – details of these licences and which [Creative Commons](#) licence will apply to this Work are set out in our licence referred to above.

Other than as permitted in any relevant BMJ Author's Self Archiving Policies, I confirm this Work has not been accepted for publication elsewhere, is not being considered for publication elsewhere and does not duplicate material already published. I confirm all authors consent to publication of this Work and authorise the granting of this licence.

1  
2  
3 **1 TITLE PAGE**  
4 2

5 3 **Title:** Development of a computable phenotype to identify a transgender sample for health  
6 4 research purposes: A feasibility study in a large linked provincial healthcare  
7 5 administrative cohort in British Columbia, Canada  
8 6

9 7 **Authors:** Rich AJ<sup>1,2</sup>, Poteat T<sup>3</sup>, Koehoorn M<sup>1</sup>, Li J<sup>2</sup>, Ye M<sup>2</sup>, Sereda, P<sup>2</sup>, Salway T<sup>4</sup>, Hogg RS<sup>2,4</sup>  
10 8  
11 9

12 **Affiliations:**

- 13 10 1. School of Population and Public Health, University of British Columbia, Vancouver, Canada  
14 11 2. British Columbia Centre for Excellence in HIV/AIDS, Vancouver, Canada  
15 12 3. Department of Social Medicine, University of North Carolina- Chapel Hill, Chapel Hill, USA  
16 13 4. Faculty of Health Sciences, Simon Fraser University, Burnaby, Canada  
17 14

18 15 **Corresponding author:**

19 16 Ashleigh J Rich  
20 17 [ajrich@mail.ubc.ca](mailto:ajrich@mail.ubc.ca)  
21 18

22 19 2206 East Mall  
23 20 Vancouver, BC  
24 21 V6T 1Z3  
25 22 Canada  
26 23  
27 24  
28 25  
29 26  
30 27  
31 28  
32  
33  
34  
35  
36  
37  
38  
39  
40  
41  
42  
43  
44  
45  
46  
47  
48  
49  
50  
51  
52  
53  
54  
55  
56  
57  
58  
59  
60



## 1 ABSTRACT

2  
3  
4  
5  
6  
7  
8  
9  
10  
11  
12  
13  
14  
15  
16  
17  
18  
19  
20  
21  
22  
23  
24  
25  
26  
27  
28  
29  
30  
31  
32  
33  
34  
35  
36  
37  
38  
39  
40  
41  
42  
43  
44  
45  
46  
47  
48  
49  
50  
51  
52  
53  
54  
55  
56  
57  
58  
59  
60

**Objectives:** Innovative methods are needed for identification of transgender people in administrative records for health research purposes. This study investigated the feasibility of using transgender-specific healthcare utilization in a Canadian population-based, health records database to develop a computable phenotype (CP) and identify the proportion of transgender people within the HIV-positive population as a public health priority.

**Design:** The COAST cohort comprises a data linkage between two provincial data sources: The BC Centre for Excellence in HIV/AIDS Drug Treatment Program, which coordinates HIV treatment dispensation across BC; and Population Data BC, a provincial data repository holding individual, longitudinal data for all BC residents (1996-2013).

**Setting:** British Columbia, Canada.

**Participants:** COAST participants include 13 907 BC residents living with HIV ( $\geq 19$  years of age) and a 10% random sample comparison group of the HIV-negative general population (514 952 individuals).

**Primary and secondary outcome measures:** Healthcare records were used to identify transgender people via a CP algorithm (diagnosis codes + androgen blocker/hormone prescriptions), to examine related diagnoses and prescription concordance, and to validate the CP using an independent provider-report transgender status measure. Demographics and chronic illness burden were also characterized for the transgender sample.

**Results:** The best-performing CP identified 137 HIV-negative and 51 HIV-positive transgender people (total 188). In validity analyses, the best-performing CP had low sensitivity (27.5%, 95%CI:17.8-39.8), high specificity (99.8%, 95%CI:99.6-99.8), low agreement using Kappa statistics (0.3, 95%CI:0.2-0.5), and moderate positive predictive value (43.2%, 95%CI:28.7-58.9). There was high concordance between exogenous-sex hormone use and transgender-specific diagnoses.

**Conclusions:** The development of a validated CP opens up new opportunities for identifying transgender people for inclusion in population-based health research using administrative health data, and offers the potential for much-needed and heretofore unavailable evidence on health status, including HIV status, and the healthcare use and needs of transgender people.

**KEYWORDS:** Transgender Persons, Health Services, Algorithms, Canada

## ARTICLE SUMMARY

### Strengths and limitations of this study:

- This study demonstrates the feasibility of developing and validating a computable phenotype for identification of a transgender sample, using a population-based representative source population and healthcare records.
- A major contribution of this study is the ascertainment of the population of transgender people living with HIV in the Canadian province of British Columbia, in a universal

1  
2  
3 1 healthcare setting, using a computable phenotype, and capacity to estimate the prevalence  
4 2 of transgender status among the population living with HIV in the province.

- 5 3  
6 4  
7 4  
8 5  
9 6  
10 7  
11 8  
12 8  
13 9  
14 10  
15 11  
16 12
- Development of a validated computable phenotype algorithm using diagnosis and prescription data to identify transgender samples in administrative data without other gender identity ascertainment measures lays the foundation for future investigation of transgender-specific research questions related to general and HIV-specific healthcare use and health outcomes for this key population.
  - While administrative data is an invaluable resource for answering important health and healthcare utilization research questions, this study is limited to those transgender people accessing medical transition care in BC and may not represent the transgender population as a whole.

17  
18  
19  
20  
21  
22  
23  
24  
25  
26  
27  
28  
29  
30  
31  
32  
33  
34  
35  
36  
37  
38  
39  
40  
41  
42  
43  
44  
45  
46  
47  
48  
49  
50  
51  
52  
53  
54  
55  
56  
57  
58  
59  
60

For peer review only

## 1 INTRODUCTION

### 2 Limited data on transgender people

3 Transgender people are often overlooked within epidemiological research and population health  
4 surveillance due to small sample size, limited research designs, and other institutional and  
5 methodological erasures.[1–3] A 2017 review of Medline-indexed literature from 1950 to 2016  
6 found 2405 published articles including transgender people, with almost half published in the last  
7 decade.[4] A 2008 United States (US)-based meta-analysis of HIV prevalence among  
8 transgender populations found 24 studies of transgender women, and five additional studies of  
9 transgender men,[5] though an updated review found 43 primary studies on transgender women  
10 and 15 on transgender men published between 2006-2017.[6] Despite this recent increase in  
11 transgender health research in general and for HIV specifically, much of the literature has  
12 focused on transgender-specific care, mental health and HIV/sexual health,[7,8] leaving the  
13 population understudied, in particular in the broader areas of physical health and healthcare  
14 utilization.

15  
16 The erasures or exclusions of transgender persons in health studies may be explained, in part, by  
17 methodological challenges. Specific to electronic health record (EHR) data, a 2017 report  
18 identified only one transgender person among 38,5820 cancer cases in a Minnesota cancer  
19 registry,[9] clearly an undercount given that 0.4% of the US general population and 0.6% (95%  
20 credibility intervals: 0.5%-0.7%) of the Minnesota population is estimated to be  
21 transgender.[10,11] This highlights the need for improved gender ascertainment and transgender  
22 inclusion in research relying on patient records and administrative data. The establishment of  
23 best practices for measuring transgender status in survey research, such as the two-step method  
24 (measuring sex assigned at birth and current gender identity), points to a way forward for  
25 transgender-inclusive population health research.[12,13] However, innovative research methods  
26 are needed to identify transgender people in studies that rely on existing data sources (in  
27 particular EHR) and that optimize the use of transgender respondents' data in non-transgender  
28 specific research.

### 29 Computable phenotypes for transgender health research

30 Previous research in transgender health largely comprises cross-sectional studies, case reports,  
31 and qualitative or observational research.[7] Much consists of clinic- or venue-based  
32 convenience samples or lack comparison groups.[7,8] The literature is further characterized by  
33 inconsistent transgender status measurement,[14] small sample sizes, and focus on the United  
34 States (US).[8] In response, researchers have called for advancing transgender health research  
35 methods - namely ascertainment of high-quality samples via systematic approaches - including  
36 for general population-based and health systems-based studies.[15] One opportunity for the  
37 advancement of transgender health research methods is the emerging use of computable  
38 phenotypes (CPs)[16] or case ascertainment algorithms, to identify transgender samples in  
39 healthcare utilization data. A computable phenotype is an algorithm for identifying a clinical  
40 feature, condition, or set of characteristics that can be determined directly from EHR and other  
41 ancillary health care data systems (e.g., disease registries, insurance claims data) data.[17] CPs  
42 are developed using a combination of data elements (e.g., sociodemographic variables, clinical  
43 diagnoses) and value sets (i.e., the selection of a set of relevant values for each data element).  
44 Development of CPs using standardized methods and definitions enables identification and  
45 inclusion of transgender persons in research, as well as replication of analyses across data  
46

1 sources, healthcare organizations/sites and studies. CPs have application in clinical care,  
2 surveillance, and health research.

3  
4  
5  
6  
7 4 Recently, CP and other EHR-based algorithm methods have been applied in a number of settings  
8 primarily in the US to identify transgender samples for health research.[14] Specifically, the  
9 STRONG study identified a transgender cohort (n = 6,456) using EHR data from Kaiser  
10 Permanente health plan members in California and Georgia, for investigation of general and  
11 transgender-specific health outcomes.[18] Blosnich et al identified 3,177 people with a “gender  
12 identity disorder” diagnosis among military veterans accessing care through the US Veterans  
13 Health Administration healthcare system,[19] for examination of mental health and other  
14 outcomes. Researchers with the US Centers for Medicare & Medicaid Services identified 4,098  
15 transgender beneficiaries using national Medicare claims data,[20] and researchers at Vanderbilt  
16 University identified 234 transgender patients in their university clinic EHR data.[16] While  
17 these cohorts represent important opportunities for advancement of transgender health research,  
18 these methods have yet to be applied widely outside the US context. This is particularly  
19 important as different jurisdictions may vary in medical billing and coding practices, healthcare  
20 system patient populations, and representativeness of the general population. Specifically, in  
21 Canada, healthcare is delivered through a provincially administered universal healthcare system.  
22 As such, research using EHR provides an opportunity to develop methods for population-based,  
23 representative estimates of transgender populations within the Canadian context. Coupled with  
24 the current absence of gender ascertainment measures in population-based routinely collected  
25 data (e.g., census, national government health surveys, etc.) in Canada and many other  
26 jurisdictions, this remains an evidence need.

### 27 **Summary of study rationale**

28 This study investigated the application of emerging transgender health research methods,  
29 specifically CPs, in a Canadian context for the first time, testing the feasibility of identification  
30 of a transgender sample using EHR data from a provincial healthcare administrative data-linked  
31 cohort.

## 32 **METHODS**

### 33 **Data Sources and Participants**

34 The Comparative Outcomes and Service Utilization Trends Study (COAST)  
35 COAST is a population-based cohort study focused on health services utilization research  
36 questions among all people known to be living with HIV (PLWH) in the province of British  
37 Columbia (BC) and a 10% random sample comparison group of the HIV-negative general  
38 population.[21] The COAST cohort comprises individual-level, longitudinal data from PLWH  
39 who have ever accessed HIV treatment in BC between 1996 and 2013, provided by Population  
40 Data BC (PopDataBC)[21] via data linkage between two provincial data sources, by personal  
41 health number: the Drug Treatment Program (DTP) [22] and the Ministry of Health. PopDataBC  
42 provides infrastructure for access to, and linkage of, longitudinal and individual-level  
43 administrative health data for all BC residents.[23]. The HIV-negative general population cohort  
44 was drawn randomly from the Ministry of Health registry data by PopDataBC. The COAST study  
45 has received approval from the University of British Columbia/Providence Health Care  
46 Research Ethics Board (#H09-02905) and Simon Fraser University Office of Research Ethics  
47 (#2013 s0566). The study complies with the BC Freedom of Information and Protection of

1  
2  
3 1 Privacy Act (FIPPA) and did not require informed consent as it is conducted using  
4 2 retrospective administrative and anonymized data for research and statistical purposes  
5 3 only. No patients or public were involved in this study.  
6 4

#### 5 Drug Treatment Program

6 In BC, antiretroviral therapy (ART) is provided to PLWH at no cost to the patient, and distributed  
7 through the DTP.[22] The DTP contributed a provider-reported measure of transgender status for  
8 COAST.  
9

#### 10 Ministry of Health

11 Ministry of Health data available via COAST included insured medical service billing records for  
12 outpatient visits,[24,25] hospital (in-patient) visits,[26] prescription medications,[27,28] and vital  
13 statistics.[29]  
14

### 15 **Measures & Analyses**

#### 16 Transgender computable phenotypes

17 Identification of transgender cases was tested in COAST using International Classification of  
18 Disease (ICD) codes (9<sup>th</sup> and 10<sup>th</sup> editions) and exogenous sex hormone prescription use.  
19 Transgender-specific diagnoses in medical and hospital billing records included the ICD-9 codes  
20 302.5 Trans-sexualism with unspecified history, 302.51 Trans-sexualism with asexual history,  
21 302.52 Trans-sexualism with homosexual history, 302.53 Trans-sexualism with heterosexual  
22 history, 302.6 Gender Identity Disorder in children, 302.85 Gender Identity Disorder in  
23 adolescents or adults; and ICD-10 codes F64.0 Gender Identity Disorder of childhood, F64.2  
24 Gender Identity Disorder of childhood, F64.8 Other Gender Identity Disorder, and F64.9 Gender  
25 Identity Disorder unspecified. The full list of androgen blockers and exogenous sex hormone  
26 prescriptions included in analyses is available in the supplementary material.  
27

#### 28 Concordance

29 To assess face validity and utility of diagnosis and prescription data over time in CP  
30 development (i.e. whether the identified transgender sample had exogenous sex hormone  
31 prescription use and other diagnoses patterns consistent with that of transgender populations in  
32 other studies), concordance analyses evaluated the presence of at least one included diagnosis  
33 and prescription during the COAST study follow-up period with the presence of at least one  
34 included diagnosis and prescription in the last study year. Concordance was assessed between  
35 transgender-specific diagnoses, exogenous sex hormone and androgen blocker prescriptions, and  
36 non-transgender specific diagnoses (ICD-9 259.9 Unspecified Endocrine Disorder and ICD-10  
37 E34.9 Endocrine Disorder, Unspecified [see supplementary material]). Endocrine disorder  
38 diagnosis codes are sometimes preferred by medical providers treating transgender people in  
39 response to historic exclusions of transgender-specific care from insurance coverage and to  
40 combat the stigma of transgender-specific diagnosis codes that have historically been classified  
41 as psychiatric disorders in the Diagnostic and Statistical Manual of Mental Disorders (DSM).[30]  
42 Exogenous sex hormone use, while common in transgender populations,[5,31] is not  
43 transgender-specific. Cisgender populations also use androgen blocker and sex hormone  
44 prescriptions (e.g. estrogen to treat menopausal symptoms in cisgender women, spironolactone is  
45 used for hypertension), thus exogenous sex hormone and androgen blocker prescription use  
56  
57  
58  
59  
60

cannot independently identify transgender people. At the same time, not all transgender people use hormones and some access via non-medical sources.[32,33]

#### Validation

In British Columbia, transgender status is collected in the DTP via a provider-reported sex variable (“Male”, “Male to Female”, “Female to Male”, or “Female”). Patients reported as either “Male to Female” or “Female to Male” were classified as transgender. The provider-reported transgender measure, available for the HIV positive cohort only, was used as a ‘gold standard’ for CP validation. Sensitivity, specificity, positive predictive value and kappa statistics with corresponding 95% confidence intervals (CI) were calculated for identifying transgender people via the CPs, in the HIV positive cohort only. Follow-up time (mean and range) for each CP group was also produced.

#### Demographics and chronic conditions

To further assess face validity of the transgender CP for future health research, descriptive statistics were calculated for the transgender sample produced via application of the best performing CP from the validation analysis to both the COAST HIV-positive and HIV-negative cohorts. Descriptive statistics included COAST study key sociodemographic and health variables, specifically laboratory confirmed HIV serostatus (HIV-positive/HIV-negative), baseline age, patient’s Health Authority (five provincial regions for the administration of health services that include large urban centres, suburban regions, and rural/remote areas), and chronic illness burden based on standardized case definitions from the BC Ministry of Health [34] and the BC Cancer Agency.[35]

## RESULTS

The total COAST cohort included 528 859 people, of which 514 952 were HIV-negative (10% general population random sample) and 13 907 were PLWH (Figure 1).

*[Figure 1 here]*

#### Concordance

Of the 237 people who had ever had a transgender-specific diagnosis during the study period, 19.4% also had a recent diagnosis in the last follow-up year (Table 1). None had an unspecified endocrine disorder diagnosis at any time; thus, this diagnosis was excluded from all CPs. Of the 237, 79.3% had an exogenous sex hormone or androgen blocker prescription at least once during the study period and 46.4% had one in the last year.

**Table 1. Concordance analyses for diagnoses and hormone measures**

|                                            | N   | %    |
|--------------------------------------------|-----|------|
| ≥ Transgender ICD- ever                    | 237 | 100  |
| ≥ Transgender ICD- recent                  | 46  | 19.4 |
| Unspecified endocrine disorder use- ever   | 0   | 0.0  |
| Unspecified endocrine disorder use- recent | 0   | 0.0  |
| ≥ Hormone/blocker use- ever                | 188 | 79.3 |
| ≥ Hormone/blocker use-recent               | 110 | 46.4 |

39

## 1 Validation

2 While no one CP consistently performed well across all validation metrics, the CP with the best  
 3 overall performance across test statistics was based on having received at least one transgender-  
 4 specific diagnosis and at least one androgen blocker/exogenous sex hormone prescription over  
 5 the study follow-up period (Table 2). This CP had high specificity (99.8%, 95% CI: 99.6-99.8),  
 6 low sensitivity (27.5%, 95% CI: 17.8-39.8), low to moderate Kappa coefficients (0.3, 95% CI:  
 7 0.2-0.5) and moderate positive predictive values (43.2%, 95% CI: 28.7-58.9). This CP also had  
 8 the second longest mean follow-up time (mean: 136.3, range: 21.0-203.0), similar overall to the  
 9 other CP groups (mean: 136.5, range: 21.0-203.0; mean: 117.1, range: 24.0-198.0; mean: 130.4,  
 10 range: 69.0-198.0; respectively).

11  
 12 **Table 2. Validation measures of transgender computable phenotype (CP) with provider-  
 13 report transgender status measures, in COAST HIV-positive cohort**

| CP                                                         | Sensitivity<br>(95% CI) | Specificity<br>(95% CI) | PPV (95%<br>CI)      | Kappa<br>(95% CI) |
|------------------------------------------------------------|-------------------------|-------------------------|----------------------|-------------------|
| ≥ 1 transgender ICD- ever                                  | 27.5 (17.8, 39.8)       | 99.7 (99.6, 99.8)       | 40.4 (26.7,<br>55.7) | 0.3 (0.2, 0.4)    |
| ≥ 1 transgender ICD- recent                                | 8.7 (3.6, 18.6)         | 100.0 (99.9,<br>100.0)  | 85.7 (42.0,<br>99.4) | 0.2 (0.1, 0.3)    |
| ≥ 1 transgender ICD AND ≥ 1<br>hormone/blocker use- ever   | 27.5 (17.8, 39.8)       | 99.8 (99.6, 99.8)       | 43.2 (28.7,<br>58.9) | 0.3 (0.2, 0.5)    |
| ≥ 1 transgender ICD AND ≥ 1<br>hormone/blocker use- recent | 7.3 (2.7, 16.8)         | 100.0 (99.9,<br>100.0)  | 83.3 (36.5,<br>99.1) | 0.1 (0.0, 0.2)    |

## 14 Transgender phenotype

15 Applying the best-performing CP, 137 HIV-negative people and 51 HIV-positive people (188  
 16 total) were identified as transgender in the respective COAST cohorts (Figure 1).

## 17 Demographics and chronic conditions

18 Demographic characteristics and chronic conditions for the 188 transgender people identified via  
 19 the best-performing CP are presented in Figures 2 to 4. Transgender people were geographical  
 20 located throughout BC health regions. The Vancouver Coastal Health Authority region, which  
 21 includes the largest municipal area in BC, had the highest concentration of transgender people  
 22 (44.2%) while the Northern Health Authority region - a predominantly rural and remote area of  
 23 the province - had the lowest (1.6%).<sup>[36]</sup> The HIV-positive group had a higher median age than  
 24 the HIV-negative group (35 [Q1, Q3: 30,42] and 30 [Q1, Q3: 19,42], respectively). For the HIV-  
 25 negative sample, the largest proportion of transgender people were aged 19 to 29 years (44.5%)  
 26 and the smallest proportion aged 55 years and older (<3%). For the HIV-positive sample, the  
 27 largest proportion were aged 30 to 34 years (25.5%) and the smallest proportion aged 55 years  
 28 and older (<2%).

1  
2  
3 1 [Figures 2 and 3 here]  
4 2

5 3 Overall, HIV-positive transgender people had a higher prevalence of at least one chronic  
6 4 condition (other than HIV) compared to HIV-negative transgender people (88.2% versus 85.4%,  
7 5 respectively), and of two or more chronic conditions (76.5% versus 52.6%, respectively).  
8 6 Specific chronic disease differences between transgender people living with and without HIV  
9 7 were most notable for a higher prevalence among the HIV-positive cohort of cardiovascular  
10 8 disease, chronic kidney disease, osteoarthritis, schizophrenia and personality disorders, and  
11 9 chronic liver disease, but a lower prevalence for hypertension.  
12  
13

14 10  
15 11 [Figure 4 here]  
16 12

## 17 13 **DISCUSSION**

18 14 This study demonstrates the feasibility of identification of a sample of transgender people in a  
19 15 large linked provincial healthcare administrative database, using a CP based on prescriptions and  
20 16 diagnoses. Among a growing number of studies using EHR and CP methods to identify  
21 17 transgender samples for health research purposes, this is the first to do so in Canada., to  
22 18 independently validate the CP using a ‘gold standard’ of provider-reported transgender status,  
23 19 and the only to use population-based data.  
24  
25

### 26 21 **Concordance**

27 22 There was high concordance between transgender-specific diagnoses and exogenous sex  
28 23 hormone or androgen blocker prescription use in this study. That nearly half of those with at  
29 24 least one transgender-specific diagnosis had been dispensed hormones or blockers in the past  
30 25 year is consistent with findings from US and Canadian studies (48.9% and 43.0%,  
31 26 respectively)[20,32,33] - suggesting face validity for the current CP.  
32  
33

### 34 28 **CP development and validation**

35 29 The best-performing CP overall successfully identified cisgender people who were truly  
36 30 cisgender (specificity) and correctly identified transgender people who were truly transgender  
37 31 (0.2% false positive rate, results not shown). However, the selected CP had relatively low  
38 32 sensitivity, missing approximately 72.5% of ‘true’ transgender people in COAST, as identified  
39 33 by the gold standard provider-based measure. Though a relatively small proportion of the ‘true’  
40 34 transgender sample was identified in this study, the impact on future analyses comparing health  
41 35 outcomes for transgender and cisgender groups is likely negligible, as even the large proportion  
42 36 of ‘true’ transgender people misclassified as cisgender (approximate n=496) is a very small  
43 37 proportion of the total COAST sample. At worst, this misclassification would bias results related  
44 38 to disparities between transgender and cisgender health toward the null, producing a conservative  
45 39 attenuated effect in COAST, and other such administrative datasets. Further, as discussed below,  
46 40 gender identity classification will likely greatly improve as transgender care shifts further into  
47 41 the fee-for-service system in BC. As in other Canadian administrative data studies, low  
48 42 sensitivity may be explained in part by provider and system billing preferences using 3-digit ICD  
49 43 diagnosis coding instead of the more specific 4-digit coding, and inconsistencies in the BC  
50 44 billing management system.[37] Despite the low sensitivity, CP development in this study with  
51 45 high specificity offers an advancement for transgender health research. A measure that correctly  
52 46 identifies cases for transgender samples in research with good success translates to better  
53  
54  
55  
56  
57  
58  
59  
60



1  
2  
3 1 opportunities to include transgender people in health studies and to investigate their health  
4 2 relative to other groups. While future research may lead to improvements in CP development, the  
5 3 CP identified in the current study with good specificity, albeit relatively poor sensitivity, has  
6 4 important utility in advancing opportunities in transgender health research. Additionally, while  
7 5 differential follow-up time can affect algorithm performance, the similar mean and range follow-  
8 6 up time for all CPs in this study suggests that differential follow-up time was not an important  
9 7 source of bias in this study.  
10 8

11 9  
12 10 The limited agreement between the CP and provider-report transgender status may be due to the  
13 11 widely varying transgender status prevalence depending on study design and ascertainment  
14 12 measures used.[14] In the BC context, the CP and the DTP measures are assessing transgender  
15 13 status in different ways and for different purposes. In the DTP, transgender status is ascertained  
16 14 in the context of HIV diagnosis and ART prescribing, during which demographics and HIV  
17 15 transmission risk factors are recorded. This differs from recording diagnoses in EHR for those  
18 16 accessing transgender-specific care as utilized in the CP. This may explain the lower PPV for the  
19 17 best-performing CP compared to the CP based on recent transgender diagnoses, suggesting the  
20 18 DTP provider-reported transgender status measure has better coverage for recent cases and the  
21 19 potential for use of recent diagnosis over ever to be beneficial in future CP development.  
22 20 Ultimately, a single CP may not be sufficient for all intended purposes and the best applicable  
23 21 CP (using different types of diagnoses, prescriptions or procedures) may differ depending on the  
24 22 intended healthcare, health research, or health policy application.[17]  
25 23  
26 24

27 25  
28 26 There is limited literature on EHR-based studies with the ability to validate an administrative  
29 27 transgender measure using a ‘gold standard’ comparison measure.[16] The two previous studies  
30 28 that have developed and validated algorithms to identify transgender individuals have both been  
31 29 conducted in non-representative samples in the US, one using Medicare data[38] and one in a  
32 30 university medical center.[16] Similar to the current study, the Medicare study found high  
33 31 specificity when comparing an EHR-based and a two-step survey-based transgender measure.  
34 32 However, the Medicare study found that the EHR measure performed consistently well with high  
35 33 sensitivity and a high Kappa statistic, unlike in the current study. Using chart review as the ‘gold  
36 34 standard’ for comparison of transgender status, Ehrenfeld et al. found a low false positive rate for  
37 35 their best-performing algorithm (3%), though not as low as the false positive rate in the current  
38 36 study. The overall high levels of agreement for transgender measures in the two previous studies  
39 37 is likely a function of the lack of independence between the ‘gold standard’ and the CP or  
40 38 algorithm measures. Specifically, only those classified as transgender in the Medicare EHR data  
41 39 were offered survey participation to complete the two-step ‘gold standard’ survey measure, and  
42 40 only those cases identified as transgender in the university clinic EHR were included in chart  
43 41 review. Thus, previous studies could assess agreement between the two measures, but not  
44 42 robustly validate either. In the current study, the DTP provider-based transgender status measure  
45 43 is independent and thus could be used for robust CP validation.  
46 44  
47 45  
48 46  
49 47  
50 48  
51 49  
52 50  
53 51  
54 52  
55 53  
56 54  
57 55  
58 56  
59 57  
60 58

59 42 While not possible to incorporate free-text records in case-finding algorithms in the current study  
60 43 as only structured EHR data is linked through COAST, it is worth noting the opportunities  
44 44 potentiated by use of NLP and machine learning approaches as methods for identifying  
45 45 transgender samples in EHR data as this research area continues to grow. Outside of transgender  
46 46 health, the use of NLP and machine learning to mine unstructured free-text EHR data has

1 demonstrated efficiency in improving case ascertainment algorithm accuracy .[39] As ‘gold  
2 standard’ two-step sex assigned at birth and current gender identity measures of transgender  
3 status[12] are slowly being implemented in routinely collected healthcare data sources, in the  
4 meantime NLPs to extract free-text data can be used to produce better gold standards against  
5 which to measure algorithm performance, as demonstrated by the Medicare study.[38]

### 7 **Transgender status prevalence & ascertainment**

8 Based on a recent meta-analysis of transgender status prevalence in population-based probability  
9 samples,[10] it was expected that an effective CP would identify 0.4% of the general population  
10 as transgender, or approximately 54 of the HIV-positive COAST cohort (n=13 907) and 3,098 of  
11 the HIV-negative cohort (n=516 340). Consistent with expectations, the best-performing CP  
12 identified 51 PLWH as transgender, equivalent to a transgender status prevalence of 0.4% among  
13 PLWH. Contrary to expectations, the best-performing CP identified less than 5% of the number  
14 of transgender persons expected in the HIV-negative cohort. This is likely a result of a number of  
15 factors including the limitation of CPs to the subset of a population accessing care as noted, and  
16 the result of most transgender people in BC receiving care currently outside the main fee-for-  
17 service healthcare delivery system. However, it is also consistent with the undercount of  
18 transgender populations using diagnostic criteria compared to other methods of ascertainment  
19 demonstrated in other studies.[14]

20  
21 Using the broadest CP algorithm (any transgender-specific diagnosis ever, n=56) and those  
22 identified by provider-report together (total n=106), the total transgender PLWH sample would  
23 represent as high as 0.88% (range: 0.73-1.1%) of the prevalent HIV infections in BC in  
24 2014.[40] This overrepresentation of transgender people among PLWH is consistent with  
25 evidence of a disproportionate HIV burden for transgender populations globally,[5,41,42] as well  
26 as in line with the only other available data on the proportion of PLWH who are transgender,  
27 from US national surveillance data (2012 data: 1.1%, 95%CI: 0.8-1.4).[43]

### 29 **Demographics and chronic conditions**

30 Despite moderate to low performance by some validation metrics, particularly low sensitivity,  
31 the CP was able to detect meaningful results in the characterization of demographics and chronic  
32 condition burden for the transgender sample - supporting CP face validity. The population  
33 density and age distribution by HIV-status of transgender people in this study is largely  
34 consistent with general population patterns, as well as the larger COAST cohort.[21,36] The  
35 overall higher burden of chronic illness for transgender people living with HIV versus without  
36 HIV in this study is consistent with elevated chronic illness risk and morbidity among non-  
37 transgender PLWH.[44] This higher chronic disease burden is linked to HIV disease processes  
38 and related inflammatory immune response.[45] While a small but growing number of studies  
39 have begun to investigate the chronic illness burden for transgender populations in other  
40 industrialized settings,[16,19,46–48] including using EHR data, findings vary widely due to  
41 differences in sampling, study design, setting and measurement.

### 43 **Limitations**

44 Findings from this study should be interpreted in the context of a few key limitations. CPs are by  
45 design only applicable to people accessing healthcare services, often motivated by illness and  
46 aided by the ability to access care. As such, this study is limited to those transgender people

1  
2  
3 1 accessing medical transition care in BC and may only represent 24% to 47% of the total  
4 2 transgender population.[33] This study was also limited by the inability to validate the  
5 3 transgender CP among the HIV-negative COAST cohort, as a 'gold standard' provider-based  
6 4 transgender measure was only available for the HIV-positive cohort. It is possible that the  
7 5 transgender CPs would perform differently in populations living without HIV, particularly as  
8 6 healthcare contact is higher among populations living with HIV. Additionally, this study should  
9 7 be considered in light of the context in which it was conducted, an environment in which  
10 8 transgender healthcare delivery in BC is currently shifting from specialized care settings to the  
11 9 main primary care fee-for-service settings. Given that COAST only includes fee-for-service data,  
12 10 this study was limited by the inability to capture transgender people who access transgender care  
13 11 outside the fee-for-service system. However, fortunately, as the shift to the fee-for-service  
14 12 system occurs, transgender ascertainment via CPs in BC will likely improve. The administrative  
15 13 data used in this study may also be susceptible to coding error (and coding biases/practices)  
16 14 across conditions and settings,[49] potentially introducing misclassification bias in terms of  
17 15 transgender ascertainment. Finally, chronic condition prevalence data reported in this study  
18 16 should be interpreted with caution, given potential selection bias by serostatus in the COAST  
19 17 cohort; though any such bias likely resulted in conservative estimates of difference by serostatus  
20 18 in this analysis.  
21 19

## 20 20 CONCLUSION

21 21 This study makes a number of important contributions to the literature on innovative methods in  
22 22 transgender health. Major contributions include development and validation of a transgender CP,  
23 23 using a population-based representative source population, in the Canadian context. Another  
24 24 strength is the approximately complete ascertainment of the population of transgender PLWH in  
25 25 BC, and capacity to estimate transgender status prevalence among PLWH. In a current funding  
26 26 environment of limited support for longitudinal transgender health studies in the US and none to  
27 27 date in Canada, this study and the methods employed offer an efficient, replicable and cost-  
28 28 effective way forward in creating electronic cohorts for advancing transgender health  
29 29 research.[15] Moreover, the recent rollback of sexual orientation and gender identity data  
30 30 collection and legal changes in insurance coverage of transgender healthcare in the US potentiate  
31 31 decline in accurate claims coding for gender-affirming care.[30] This highlights the utility of  
32 32 work in this area from other jurisdictions, particularly those with transgender-inclusive universal  
33 33 healthcare systems such as Canada.  
34 34

35 35 Future research should build upon the methods developed in this study and explore  
36 36 complimentary approaches for gender identity ascertainment in administrative and EHR data,  
37 37 such as machine learning approaches, as have been used to develop algorithms based on  
38 38 healthcare utilization data in other research areas. Finally, the current study lays the foundation  
39 39 for future work with the ability to study transgender health and healthcare use patterns over time,  
40 40 with linkage to laboratory data, as well as inclusion of appropriate comparison groups.[15,50]  
41 41

## 42 42 ACKNOWLEDGEMENTS & DISCLAIMER

43 43 The authors thank the COAST study participants, the BC Centre for Excellence in HIV/AIDS,  
44 44 the BC Ministry of Health, BC Vital Statistics Agency, PharmaNet and the institutional data  
45 45 stewards for granting access to the data, and Population Data BC for facilitating the data linkage  
46 46 process. In addition, we would like to thank the COAST core team members and other support  
47 47  
48 48  
49 49  
50 50  
51 51  
52 52  
53 53  
54 54  
55 55  
56 56  
57 57  
58 58  
59 59  
60 60

1  
2  
3 1 staff at these institutions for their administrative assistance with the data access and preparation.  
4 2 All inferences, opinions, and conclusions drawn in this paper are those of the authors, and do not  
5 3 reflect the opinions or policies of the Data Steward(s). There are no conflicts of interest to  
6 4 declare.  
7 5

#### 6 **COMPETING INTERESTS**

7 None declared.  
8

#### 9 **FUNDING**

10 This work was supported by the Canadian Institutes of Health Research, through an Operation  
11 Grant [grant number 130419], a Foundation Award to RSH [grant number 143342], and a  
12 Doctoral Research Award to AJR [grant number 152382] and support from the British Columbia  
13 Centre for Excellence in HIV/AIDS. The DTP receives funding from the provincial government  
14 of British Columbia (PharmaCare). The funders had no role in the study design, analysis,  
15 interpretation of the data, drafting of the manuscript or in the decision to submit for  
16 publication.  
17

#### 18 **CONTRIBUTORS**

19 AJR led the study from conceptualization to analysis plan to interpretation, drafting of the first  
20 manuscript version, revisions and final version. RSH acquired study data and funding. TP, MK,  
21 PS, TS, and RSH all contributed to study design, interpretation of results, and reviewed manuscript  
22 versions. JL and MY contributed to study analysis and reviewed manuscript versions. All authors  
23 provided critical review of first and subsequent manuscript drafts, approved the final version, and  
24 agree to be accountable for the work presented.  
25

#### 26 **PATIENT AND PUBLIC INVOLVEMENT**

27 No patients involved.  
28

#### 29 **DATA SHARING STATEMENT**

30 The data used for this study are held by the BC Centre for Excellence in HIV/AIDS under the  
31 authority of the BC Ministry of Health; as they contain confidential patient health records  
32 including HIV serostatus, data cannot be made available to other parties.  
33  
34  
35  
36  
37

1  
2  
3 **1 FIGURES LEGENDS**  
4

5 **2 Figure 1. Total transgender sample identified using a computable phenotype with**  
6 **3 electronic health records**  
7  
8  
9

10 **5 Figure 2. Geographic distribution of transgender people across province, by health**  
11 **6 authority\***

12 *7 % of transgender individuals with known health authority (n=182)*  
13  
14

15 **9 Figure 3. Age distribution of transgender sample, by HIV serostatus**  
16  
17

10

18 **11 Figure 4. Co-morbidities among transgender sample, by HIV serostatus**  
19  
20

12

21  
22 **13**  
23  
24  
25  
26  
27  
28  
29  
30  
31  
32  
33  
34  
35  
36  
37  
38  
39  
40  
41  
42  
43  
44  
45  
46  
47  
48  
49  
50  
51  
52  
53  
54  
55  
56  
57  
58  
59  
60

## 1 REFERENCES

- 2 1. Bauer GR. Making sure everyone counts: Considerations for inclusion, identification, and  
3 analysis of transgender and transsexual participants in health surveys. *What Differ Sex Gen*  
4 *Make Gen Sex Health Res Casebook*. Vancouver, Canada: Canadian Institutes of Health  
5 Research (CIHR), Institute for Gender and Health (IGH); 2012. p. 59–67.
- 6 2. Bauer GR, Hammond R, Travers R, Kaay M, Hohenadel KM, Boyce M. “I don’t think this is  
7 theoretical; this is our lives”: How erasure impacts health care for transgender people. *JANAC*.  
8 2009;20:348–361.
- 9 3. Poteat T, German D, Flynn C. The conflation of gender and sex: Gaps and opportunities in  
10 HIV data among transgender women and MSM. *Glob Public Health*. 2016;11:835–848.
- 11 4. Wanta JW, Unger CA. Review of the transgender literature: Where do we go from here?  
12 *Transgender Health*. 2017;2:119–128.
- 13 5. Herbst JH, Jacobs ED, Finlayson TJ, McKleroy VS, Neumann MS, Crepaz N, et al.  
14 Estimating HIV prevalence and risk behaviors of transgender persons in the United States: a  
15 systematic review. *AIDS Behav*. 2008;12:1–17.
- 16 6. Becasen JS, Denard CL, Mullins MM, Higa DH, Sipe TA. Estimating the prevalence of HIV  
17 and sexual behaviors among the US transgender population: A systematic review and meta-  
18 analysis, 2006–2017. *Am J Public Health*. 2019;109:e1–8.
- 19 7. Marshall Z, Welch V, Thomas J, Brunger F, Swab M, Shemilt I, et al. Documenting research  
20 with transgender and gender diverse people: protocol for an evidence map and thematic analysis.  
21 *Syst Rev*. 2017;6:35.
- 22 8. Reisner SL, Poteat T, Keatley J, Cabral M, Mothopeng T, Dunham E, et al. Global health  
23 burden and needs of transgender populations: a review. *The Lancet*. 2016;388:412–436.
- 24 9. Cathcart-Rake EJ, Lightner DJ, Quevedo FJ, Ertz DC, Jatoi A. Cancer in transgender patients:  
25 One case in 385,820 is indicative of a paucity of data. *J Oncol Pract*. 2017;JOP2017027714.
- 26 10. Meerwijk EL, Sevelius JM. Transgender population size in the United States: A meta-  
27 regression of population-based probability samples. *Am J Public Health*. 2017;107:e1–e8.
- 28 11. Flores AR, Herman JL, Gates GJ, Brown TNT. How Many Adults Identify as Transgender in  
29 the United States? [Internet]. Los Angeles, CA: Williams Institute; 2016 Jun p. 13. Available  
30 from: [https://williamsinstitute.law.ucla.edu/wp-content/uploads/How-Many-Adults-Identify-as-](https://williamsinstitute.law.ucla.edu/wp-content/uploads/How-Many-Adults-Identify-as-Transgender-in-the-United-States.pdf)  
31 [Transgender-in-the-United-States.pdf](https://williamsinstitute.law.ucla.edu/wp-content/uploads/How-Many-Adults-Identify-as-Transgender-in-the-United-States.pdf)
- 32 12. The GenIUSS Group. Best Practices for Asking Questions to Identify Transgender and Other  
33 Gender Minority Respondents on Population-Based Surveys. Los Angeles, CA: The Williams  
34 Institute; 2014.

13. Bauer GR, Braimoh J, Scheim AI, Dharma C. Transgender-inclusive measures of sex/gender for population surveys: Mixed-methods evaluation and recommendations. *PLOS ONE*. 2017;12:e0178043.
14. Collin L, Reisner SL, Tangpricha V, Goodman M. Prevalence of transgender depends on the “case” definition: A systematic review. *J Sex Med*. 2016;13:613–626.
15. Reisner SL, Deutsch MB, Bhasin S, Bockting W, Brown GR, Feldman J, et al. Advancing methods for US transgender health research. *Curr Opin Endocrinol Diabetes Obes*. 2016;23:198–207.
16. Ehrenfeld JM, Gottlieb KG, Beach LB, Monahan SE, Fabbri D. Development of a Natural Language Processing Algorithm to Identify and Evaluate Transgender Patients in Electronic Health Record System. *Ethn Dis*. 2019;29:441–50.
17. Richesson R, Smerek M, Rusincovitch S, Zozus MN, Chaudhuri PS, Hammond WE, et al. Electronic Health Records-Based Phenotyping. In: Uhlenbrauck G, editor. *NIH Collab Living Textbook Pragmatic Clin Trials*. Bethesda, Maryland; 2014.
18. Quinn VP, Nash R, Hunkeler E, Contreras R, Cromwell L, Becerra-Culqui TA, et al. Cohort profile: Study of Transition, Outcomes and Gender (STRONG) to assess health status of transgender people. *BMJ Open*. 2017;7:e018121.
19. Blosnich JR, Brown GR, Shipherd Phd JC, Kauth M, Piegari RI, Bossarte RM. Prevalence of gender identity disorder and suicide risk among transgender veterans utilizing veterans health administration care. *Am J Public Health*. 2013;103:e27–32.
20. Proctor K, Haffer SC, Ewald E, Hodge C, James CV. Identifying the transgender population in the Medicare program. *Transgender Health*. 2016;1:250–265.
21. Eyawo O, Hull MW, Salters K, Samji H, Cescon A, Sereda P, et al. Cohort profile: the Comparative Outcomes And Service Utilization Trends (COAST) Study among people living with and without HIV in British Columbia, Canada. *BMJ Open*. 2018;8:e019115.
22. Drug Treatment Program [Internet]. BC Cent. Excell. HIV/AIDS. 2010 [cited 2019 Sep 27]. Available from: <http://www.cfenet.ubc.ca/drug-treatment-program>
23. Population Data BC. About PopData [Internet]. Popul. Data BC. 2017 [cited 2019 Sep 27]. Available from: <https://www.popdata.bc.ca/aboutus>
24. British Columbia Ministry of Health (2014). Medical Services Plan (MSP) Payment Information File [Internet]. Popul. Data BC. 2014 [cited 2019 Sep 27]. Available from: <http://www.popdata.bc.ca/data>
25. British Columbia Ministry of Health (2014). Consolidation File (MSP Registration & Premium Billing) [Internet]. Popul. Data BC. 2014 [cited 2019 Sep 27]. Available from: <http://www.popdata.bc.ca/data>

- 1  
2  
3 1 26. Canadian Institute for Health Information (2014). Discharge Abstract Database (Hospital  
4 2 Separations) [Internet]. Popul. Data BC. 2014 [cited 2019 Sep 27]. Available from:  
5 3 <http://www.popdata.bc.ca/data>  
6  
7  
8 4 27. British Columbia Ministry of Health (2014). PharmaCare [Internet]. Popul. Data BC. 2014  
9 5 [cited 2019 Sep 27]. Available from: <http://www.popdata.bc.ca/data>  
10  
11 6 28. British Columbia Ministry of Health (2014). PharmaNet [Internet]. Popul. Data BC. 2014  
12 7 [cited 2019 Sep 27]. Available from: <http://www.popdata.bc.ca/data>  
13  
14 8 29. British Columbia Vital Statistics Agency (2014). Vital Statistics Deaths [Internet]. Popul.  
15 9 Data BC. 2014 [cited 2019 Sep 27]. Available from: <http://www.popdata.bc.ca>  
16  
17  
18 10 30. Arnold JD, Nelson AE, Loubier EM. Trends in Insurance Coverage for Gender-Affirming  
19 11 Surgeries. *JAMA Surg.* 2018;153:972.  
20  
21 12 31. Radix A, Sevelius J, Deutsch MB. Transgender women, hormonal therapy and HIV  
22 13 treatment: a comprehensive review of the literature and recommendations for best practices. *J Int*  
23 14 *AIDS Soc.* 2016;19:20810.  
24  
25 15 32. Rotondi NK, Bauer GR, Scanlon K, Kaay M, Travers R, Travers A. Nonprescribed hormone  
26 16 use and self-performed surgeries: “do-it-yourself” transitions in transgender communities in  
27 17 Ontario, Canada. *Am J Public Health.* 2013;103:1830–1836.  
28  
29  
30 18 33. Scheim AI, Bauer GR. Sex and gender diversity among transgender persons in Ontario,  
31 19 Canada: results from a respondent-driven sampling survey. *J Sex Res.* 2015;52:1–14.  
32  
33 20 34. Chronic Disease Information Working Group. BC Chronic Disease and Selected Procedure  
34 21 Case Definitions [Internet]. British Columbia, Canada: BC Ministry of Health; 2019 Apr p. 1–  
35 22 132. Available from: [https://www2.gov.bc.ca/assets/gov/health/conducting-health-research/data-](https://www2.gov.bc.ca/assets/gov/health/conducting-health-research/data-access/chronic-disease-registries-case-definitions.pdf)  
36 23 [access/chronic-disease-registries-case-definitions.pdf](https://www2.gov.bc.ca/assets/gov/health/conducting-health-research/data-access/chronic-disease-registries-case-definitions.pdf)  
37  
38  
39 24 35. British Columbia Cancer Agency. BC Cancer Registry Data [Internet]. Popul. Data BC. 2014  
40 25 [cited 2019 Sep 27]. Available from: <http://www.popdata.bc.ca/data>  
41  
42 26 36. BC Stats. Sub-provincial Population Estimates [Internet]. 2018 [cited 2019 Feb 1]. Available  
43 27 from: <file://localhost/Users/AJRich/Zotero/storage/5VM2LBUN/PopulationEstimates.html>  
44  
45 28 37. Hu W. Diagnostic Codes in MSP Claim Data. Program Monitoring and Information  
46 29 Management Branch, Resource Management Division, Medical Services Plan; 1996 p. 39.  
47  
48 30 38. Gerth J, Becerra-Culqui T, Bradlyn A, Getahun D, Hunkeler EM, Lash TL, et al. Agreement  
49 31 between medical records and self-reports: Implications for transgender health research. *Rev*  
50 32 *Endocr Metab Disord.* 2018;19:263–269.  
51  
52  
53 33 39. Liao KP, Cai T, Savova GK, Murphy SN, Karlson EW, Ananthakrishnan AN, et al.  
54 34 Development of phenotype algorithms using electronic medical records and incorporating natural  
55  
56  
57  
58  
59  
60



- 1 language processing. *The BMJ* [Internet]. 2015 [cited 2020 Oct 22];350. Available from:  
2 <https://www.ncbi.nlm.nih.gov/pmc/articles/PMC4707569/>
- 3 40. BC Centre for Disease Control. *HIV in British Columbia: Annual Surveillance Report 2015*.  
4 Vancouver, Canada: BC Centre for Disease Control; 2017.
- 5 41. Poteat T, Scheim A, Xavier J, Reisner S, Baral S. Global epidemiology of HIV infection and  
6 related syndemics affecting transgender people. *J Acquir Immune Defic Syndr*. 2016;72 Suppl  
7 3:S210–9.
- 8 42. Baral SD, Poteat T, Strömdahl S, Wirtz AL, Guadamuz TE, Beyrer C. Worldwide burden of  
9 HIV in transgender women: a systematic review and meta-analysis. *Lancet Infect Dis*.  
10 2013;13:214–222.
- 11 43. Centers for Disease Control and Prevention. Behavioral and Clinical Characteristics of  
12 Persons Receiving Medical Care for HIV Infection—Medical Monitoring Project, United States,  
13 2012 [Internet]. Washington, D.C.: Centers for Disease Control; 2015 Aug p. 42. Report No.: 12.  
14 Available from: [https://www.cdc.gov/hiv/pdf/library/reports/surveillance/cdc-hiv-](https://www.cdc.gov/hiv/pdf/library/reports/surveillance/cdc-hiv-HSSR_MMP_2012.pdf)  
15 [HSSR\\_MMP\\_2012.pdf](https://www.cdc.gov/hiv/pdf/library/reports/surveillance/cdc-hiv-HSSR_MMP_2012.pdf)
- 16 44. Grabovac I, Veronese N, Stefanac S, Haider S, Jackson SE, Koyanagi A, et al. Human  
17 Immunodeficiency Virus Infection and Diverse Physical Health Outcomes: An Umbrella Review  
18 of Meta-analyses of Observational Studies. *Clin Infect Dis*. 2019;ciz539.
- 19 45. Nasi M, De Biasi S, Gibellini L, Bianchini E, Pecorini S, Bacca V, et al. Ageing and  
20 inflammation in patients with HIV infection: Ageing, inflammation and HIV infection. *Clin Exp*  
21 *Immunol*. 2017;187:44–52.
- 22 46. Judge C., O’Donovan C., Callaghan G., Gaoatswe G., O’Shea D. Gender dysphoria -  
23 prevalence and co-morbidities in an Irish adult population. *Front Endocrinol*. 2014;5:87.
- 24 47. Cheung AS, Ooi O, Leemaqz S, Cundill P, Silberstein N, Bretherton I, et al.  
25 Sociodemographic and clinical characteristics of transgender adults in Australia. *Transgender*  
26 *Health*. 2018;3:229–38.
- 27 48. Swartz JA, Ducheny K, Holloway T, Stokes L, Willis S, Kuhns LM. A latent class analysis  
28 of chronic health conditions among HIV-Positive transgender women of color. *AIDS Behav*  
29 [Internet]. 2019 [cited 2019 Oct 2]; Available from: [http://link.springer.com/10.1007/s10461-](http://link.springer.com/10.1007/s10461-019-02543-3)  
30 [019-02543-3](http://link.springer.com/10.1007/s10461-019-02543-3)
- 31 49. Fisher ES, Whaley FS, Krushat WM, Malenka DJ, Fleming C, Baron JA, et al. The accuracy  
32 of Medicare’s hospital claims data: progress has been made, but problems remain. *Am J Public*  
33 *Health*. 2011;
- 34 50. Reisner SL, Radix A, Deutsch MB. Integrated and gender-affirming transgender clinical care  
35 and research. *J Acquir Immune Defic Syndr*. 2016;72 Suppl 3:S235–42.

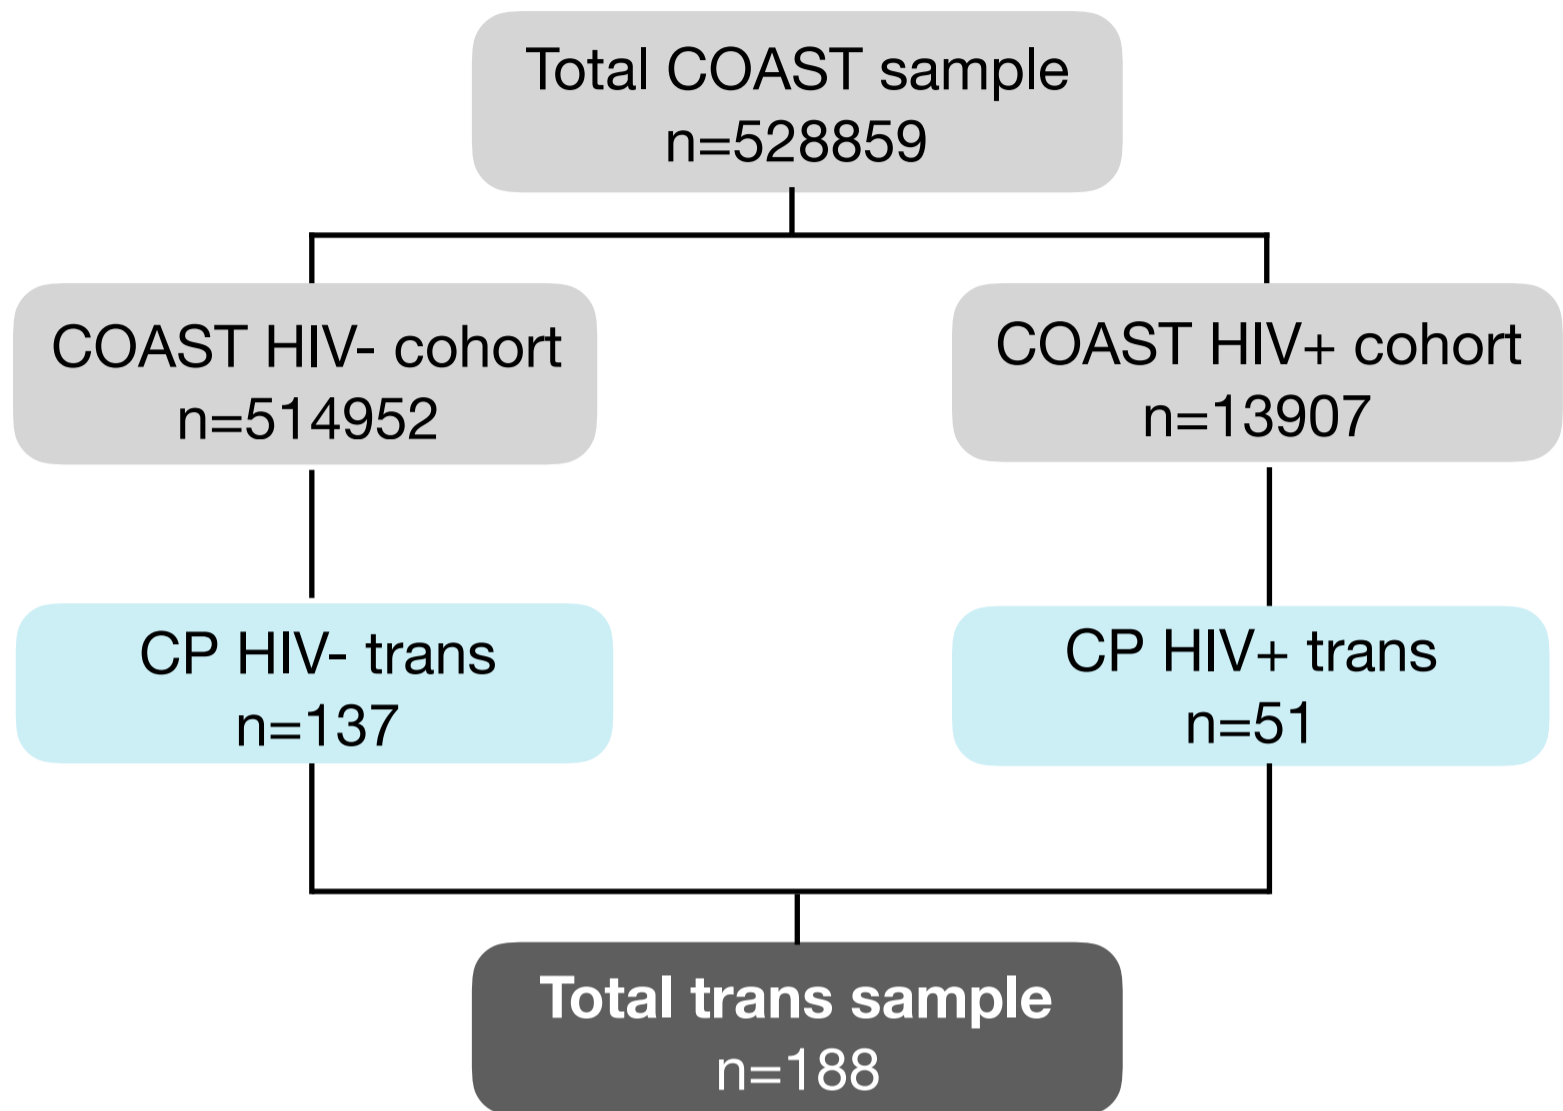

1  
2  
3  
4  
5  
6  
7  
8  
9  
10  
11  
12  
13  
14  
15  
16  
17  
18  
19  
20  
21  
22  
23  
24  
25  
26  
27  
28  
29  
30  
31  
32  
33  
34  
35  
36  
37  
38  
39  
40  
41  
42  
43  
44  
45  
46  
47  
48  
49  
50  
51  
52  
53  
54  
55  
56  
57  
58  
59  
60







## Supplementary material

**Data sources and description of data elements**

| <b>Data source</b>          | <b>Data steward</b>                                            | <b>Description</b>                                                                                                                                                                                                                             | <b>Data elements provided for this study</b> |
|-----------------------------|----------------------------------------------------------------|------------------------------------------------------------------------------------------------------------------------------------------------------------------------------------------------------------------------------------------------|----------------------------------------------|
| Medical Services Plan       | British Columbia Ministry of Health                            | For individuals covered by the provincial universal health insurance plan- Medically necessary services provided by fee-for-service physicians and other healthcare providers, laboratory services, diagnostic procedures, dental/oral surgery | ICD-9 and ICD-10 codes                       |
| Consolidation file          | British Columbia Ministry of Health                            | Demographic data on individuals receiving or registered to receive care in BC, pooled from multiple PopData sources                                                                                                                            | Sociodemographics                            |
| Discharge Abstract Database | British Columbia Ministry of Health                            | Demographic, administrative and clinical data for inpatient hospital discharges and day surgeries                                                                                                                                              | ICD-9 and ICD-10 codes                       |
| Vital statistics deaths     | British Columbia Vital Statistics Agency                       | Records of all registered deaths in BC                                                                                                                                                                                                         | Death data                                   |
| Pharmacare                  | British Columbia Ministry of Health                            | Data related to prescription drugs dispensed under the BC public drug insurance program.                                                                                                                                                       | Prescription drug name/identifier            |
| Pharmanet                   | British Columbia Ministry of Health Data Stewardship Committee | Data related to prescription drugs dispensed by community and outpatient pharmacies                                                                                                                                                            | Prescription drug name/identifier            |

## Supplementary material

|                                       |                                                    |                                                                                                                                                                   |                                                                            |
|---------------------------------------|----------------------------------------------------|-------------------------------------------------------------------------------------------------------------------------------------------------------------------|----------------------------------------------------------------------------|
| Drug Treatment Program and laboratory | British Columbia Centre for Excellence in HIV/AIDS | Antiretroviral therapy use history, laboratory testing, immunological and virologic testing, and demographic data on PLWH who have accessed antiretrovirals in BC | Providers-reported transgender status, laboratory confirmed HIV serostatus |
|---------------------------------------|----------------------------------------------------|-------------------------------------------------------------------------------------------------------------------------------------------------------------------|----------------------------------------------------------------------------|

**Prescription drugs with drug identification numbers (DIN)s**

|                          | Generic Name                   | DIN     |
|--------------------------|--------------------------------|---------|
| <b>Transfeminine</b>     |                                |         |
| <b>Androgen Blockers</b> |                                |         |
| <b>Spirolactone</b>      |                                |         |
|                          | SPIRONOLACTONE                 | 28606   |
|                          | SPIRONOLACTONE                 | 613215  |
|                          | SPIRONOLACTONE                 | 285455  |
|                          | SPIRONOLACTONE                 | 613223  |
|                          | SPIRONOLACT/HYDROCHLOROTHIAZID | 180408  |
|                          | SPIRONOLACT/HYDROCHLOROTHIAZID | 613231  |
|                          | SPIRONOLACT/HYDROCHLOROTHIAZID | 594377  |
|                          | SPIRONOLACT/HYDROCHLOROTHIAZID | 657182  |
| <b>Cyproterone</b>       |                                |         |
|                          | ETHINYL ESTRADIOL/CYPROTERONE  | 2233542 |
|                          | NO GENERIC FORMULARY           | 634514  |
|                          | CYPROTERONE ACETATE            | 704431  |
|                          | CYPROTERONE ACETATE            | 2229449 |
|                          | CYPROTERONE ACETATE            | 2229723 |
|                          | CYPROTERONE ACETATE            | 2232872 |
|                          | CYPROTERONE ACETATE            | 2245898 |
|                          | CYPROTERONE ACETATE            | 704423  |
| <b>Finasteride</b>       |                                |         |
|                          | FINASTERIDE                    | 2010909 |
|                          | FINASTERIDE                    | 2238213 |
| <b>Dutasteride</b>       |                                |         |
|                          | DUTASTERIDE                    | 2247813 |
| <b>Estrogens</b>         |                                |         |
| <b>Estrogen</b>          |                                |         |
|                          | ESTROGENS,CONJUGATED           | 830240  |
|                          | ESTROGENS,CONJUGATED           | 831395  |

## Supplementary material

|    |                                |         |
|----|--------------------------------|---------|
| 1  |                                |         |
| 2  |                                |         |
| 3  |                                |         |
| 4  | ETHYNODIOL D-ETHINYL ESTRADIOL | 28630   |
| 5  | ETHYNODIOL D-ETHINYL ESTRADIOL | 469327  |
| 6  | NORETHINDRONE-MESTRANOL        | 22608   |
| 7  | NORETHINDRONE-MESTRANOL        | 22659   |
| 8  |                                |         |
| 9  | NORETHINDRONE A-E ESTRADIOL    | 297143  |
| 10 | NORETHINDRONE A-E ESTRADIOL    | 315966  |
| 11 | NORETHINDRONE-ETHINYL ESTRAD   | 317047  |
| 12 | NORETHINDRONE-ETHINYL ESTRAD   | 372846  |
| 13 | NORETHINDRONE-ETHINYL ESTRAD   | 373265  |
| 14 | NORETHINDRONE-ETHINYL ESTRAD   | 531006  |
| 15 | NORETHINDRONE-ETHINYL ESTRAD   | 538590  |
| 16 | NORETHINDRONE-ETHINYL ESTRAD   | 602957  |
| 17 | NORETHINDRONE-ETHINYL ESTRAD   | 620947  |
| 18 | NORETHINDRONE-ETHINYL ESTRAD   | 2187086 |
| 19 | NORETHINDRONE-ETHINYL ESTRAD   | 2187108 |
| 20 | NORETHINDRONE-ETHINYL ESTRAD   | 2189054 |
| 21 | NORETHINDRONE-ETHINYL ESTRAD   | 34207   |
| 22 | NORGESTREL-ETHINYL ESTRADIOL   | 300640  |
| 23 | NORGESTREL-ETHINYL ESTRADIOL   | 579386  |
| 24 | LEVONORGESTREL-ETH ESTRA       | 707600  |
| 25 | LEVONORGESTREL-ETH ESTRA       | 782416  |
| 26 | LEVONORGESTREL-ETH ESTRA       | 782432  |
| 27 | LEVONORGESTREL-ETH ESTRA       | 2042320 |
| 28 | LEVONORGESTREL-ETH ESTRA       | 2043033 |
| 29 | NORGESTREL-ETHINYL ESTRADIOL   | 2043033 |
| 30 | LEVONORGESTREL-ETH ESTRA       | 2043726 |
| 31 | NORGESTREL-ETHINYL ESTRADIOL   | 2258560 |
| 32 | NORGESTIMATE-ETHINYL ESTRADIOL | 2258560 |
| 33 | NORETHINDRONE-MESTRANOL        | 30333   |
| 34 | NORETHINDRONE-MESTRANOL        | 30341   |
| 35 | NORETHINDRONE-MESTRANOL        | 30341   |
| 36 | LEVONORGESTREL-ETH ESTRA       | 2236974 |
| 37 | LEVONORGESTREL-ETH ESTRA       | 2236974 |
| 38 | ETHYNODIOL D-ETHINYL ESTRADIOL | 471526  |
| 39 | ETHYNODIOL D-ETHINYL ESTRADIOL | 471526  |
| 40 | NORETHINDRONE-ETHINYL ESTRAD   | 340731  |
| 41 | NORETHINDRONE-ETHINYL ESTRAD   | 340731  |
| 42 | NORETHINDRONE-MESTRANOL        | 340758  |
| 43 | NORETHINDRONE-MESTRANOL        | 340758  |
| 44 | NORETHINDRONE A-E ESTRADIOL    | 343838  |
| 45 | NORETHINDRONE A-E ESTRADIOL    | 343838  |
| 46 | NORETHINDRONE A-E ESTRADIOL    | 353027  |
| 47 | NORETHINDRONE A-E ESTRADIOL    | 353027  |
| 48 | NORETHINDRONE-ETHINYL ESTRAD   | 372838  |
| 49 | NORETHINDRONE-ETHINYL ESTRAD   | 372838  |
| 50 | NORETHINDRONE-ETHINYL ESTRAD   | 373273  |
| 51 | NORETHINDRONE-ETHINYL ESTRAD   | 373273  |
| 52 | NORETHINDRONE-ETHINYL ESTRAD   | 531014  |
| 53 | NORETHINDRONE-ETHINYL ESTRAD   | 531014  |
| 54 | NORETHINDRONE-ETHINYL ESTRAD   | 602965  |
| 55 | NORETHINDRONE-ETHINYL ESTRAD   | 602965  |
| 56 | NORETHINDRONE-ETHINYL ESTRAD   | 695734  |
| 57 | NORETHINDRONE-ETHINYL ESTRAD   | 695734  |
| 58 | NORETHINDRONE-ETHINYL ESTRAD   | 2187094 |
| 59 | NORETHINDRONE-ETHINYL ESTRAD   | 2187094 |
| 60 |                                |         |



## Supplementary material

1  
2  
3  
4  
5  
6  
7  
8  
9  
10  
11  
12  
13  
14  
15  
16  
17  
18  
19  
20  
21  
22  
23  
24  
25  
26  
27  
28  
29  
30  
31  
32  
33  
34  
35  
36  
37  
38  
39  
40  
41  
42  
43  
44  
45  
46  
47  
48  
49  
50  
51  
52  
53  
54  
55  
56  
57  
58  
59  
60

|                                |         |
|--------------------------------|---------|
| NORETHINDRONE-ETHINYL ESTRAD   | 2187116 |
| NORETHINDRONE-ETHINYL ESTRAD   | 2189062 |
| ETHINYL ESTRADIOL/NORETH AC    | 2242531 |
| NORGESTREL-ETHINYL ESTRADIOL   | 340766  |
| NORGESTREL-ETHINYL ESTRADIOL   | 342815  |
| LEVONORGESTREL-ETH ESTRA       | 586609  |
| LEVONORGESTREL-ETH ESTRA       | 707503  |
| LEVONORGESTREL-ETH ESTRA       | 782424  |
| LEVONORGESTREL-ETH ESTRA       | 782440  |
| LEVONORGESTREL-ETH ESTRA       | 2042339 |
| NORGESTREL-ETHINYL ESTRADIOL   | 2043041 |
| LEVONORGESTREL-ETH ESTRA       | 2043734 |
| NORGESTIMATE-ETHINYL ESTRADIOL | 2258587 |
| LEVONORGESTREL-ETH ESTRA       | 2236975 |
| NORGESTIMATE-ETHINYL ESTRADIOL | 1968440 |
| NORGESTIMATE-ETHINYL ESTRADIOL | 2028700 |
| NORGESTIMATE-ETHINYL ESTRADIOL | 1992872 |
| NORGESTIMATE-ETHINYL ESTRADIOL | 2029421 |
| DESOGESTREL-ETHINYL ESTRADIOL  | 2042487 |
| DESOGESTREL-ETHINYL ESTRADIOL  | 2042541 |
| DESOGESTREL-ETHINYL ESTRADIOL  | 2042479 |
| DESOGESTREL-ETHINYL ESTRADIOL  | 2042533 |
| ESTRADIOL/NORETH AC            | 2241835 |
| ESTRADIOL/NORETH AC            | 2241837 |
| LEVONORGESTREL                 | 2241674 |
| ESTROGEN,CON/M-PROGEST ACET    | 2242878 |
| ESTROGEN,CON/M-PROGEST ACET    | 2242879 |
| ESTRADIOL/NORETH AC            | 2243529 |
| ESTRADIOL/NORETH AC            | 2243530 |
| ETHINYL ESTRADIOL/DROSPIRENONE | 2261723 |
| ETHINYL ESTRADIOL/DROSPIRENONE | 2261731 |
| ETONOGESTREL/ETHINYL ESTRADIOL | 2253186 |
| ETHINYL ESTRADIOL/NORELGEST    | 2248297 |
| DIENESTROL                     | 441295  |
| DIETHYLSTILBESTROL             | 3360    |
| DIETHYLSTILBESTROL             | 2091461 |
| DIETHYLSTILBESTROL             | 2091488 |
| ESTRADIOL                      | 464791  |
| ESTRADIOL                      | 2148587 |
| ESTRADIOL                      | 464805  |

## Supplementary material

1  
2  
3  
4  
5  
6  
7  
8  
9  
10  
11  
12  
13  
14  
15  
16  
17  
18  
19  
20  
21  
22  
23  
24  
25  
26  
27  
28  
29  
30  
31  
32  
33  
34  
35  
36  
37  
38  
39  
40  
41  
42  
43  
44  
45  
46  
47  
48  
49  
50  
51  
52  
53  
54  
55  
56  
57  
58  
59  
60

|                      |         |
|----------------------|---------|
| ESTRADIOL            | 2148595 |
| ESTRADIOL VALERATE   | 29238   |
| ESTRADIOL            | 756849  |
| ESTRADIOL            | 2237807 |
| ESTRADIOL            | 2243722 |
| ESTRADIOL            | 2245676 |
| ESTRADIOL            | 756857  |
| ESTRADIOL            | 2204428 |
| ESTRADIOL            | 2231509 |
| ESTRADIOL            | 2237808 |
| ESTRADIOL            | 2243724 |
| ESTRADIOL            | 2244000 |
| ESTRADIOL            | 2246967 |
| ESTRADIOL            | 756792  |
| ESTRADIOL            | 2204444 |
| ESTRADIOL            | 2231510 |
| ESTRADIOL            | 2244002 |
| ESTRADIOL            | 2246969 |
| ESTRADIOL            | 2168898 |
| ESTRADIOL            | 2204436 |
| ESTRADIOL            | 2244001 |
| ESTRADIOL            | 2246968 |
| ESTRADIOL            | 2225190 |
| ESTRADIOL            | 2204401 |
| ESTRADIOL            | 2238704 |
| ESTRADIOL            | 2243999 |
| ESTRADIOL            | 2241332 |
| ESTRADIOL            | 2247499 |
| ESTRADIOL            | 2247500 |
| ESTROGENS,CONJUGATED | 2569    |
| ESTROGENS,CONJUGATED | 2043394 |
| ESTROGENS,CONJUGATED | 2230891 |
| ESTROGENS,CONJUGATED | 2239654 |
| ESTROGENS,CONJUGATED | 2577    |
| ESTROGENS,CONJUGATED | 265470  |
| ESTROGENS,CONJUGATED | 587281  |
| ESTROGENS,CONJUGATED | 2043408 |
| ESTROGENS,CONJUGATED | 2089    |
| ESTROGENS,CONJUGATED | 2043440 |
| ESTROGENS,CONJUGATED | 403466  |

## Supplementary material

1  
2  
3  
4  
5  
6  
7  
8  
9  
10  
11  
12  
13  
14  
15  
16  
17  
18  
19  
20  
21  
22  
23  
24  
25  
26  
27  
28  
29  
30  
31  
32  
33  
34  
35  
36  
37  
38  
39  
40  
41  
42  
43  
44  
45  
46  
47  
48  
49  
50  
51  
52  
53  
54  
55  
56  
57  
58  
59  
60

|                                |          |
|--------------------------------|----------|
| ESTROGENS,CONJUGATED           | 2043416  |
| ESTROGENS,CONJUGATED           | 2230892  |
| ESTROGENS,CONJUGATED           | 2239655  |
| ESTROGENS,CONJUGATED           | 2585     |
| ESTROGENS,CONJUGATED           | 265489   |
| ESTROGENS,CONJUGATED           | 587303   |
| ESTROGENS,CONJUGATED           | 2043424  |
| ESTROGENS,CONJUGATED           | 2043432  |
| ESTROGENS,CONJUGATED           | 2043386  |
| ME-TESTOSTERONE/ESTROGEN,CON   | 53538    |
| ESTROPIPATE                    | 282685   |
| ESTROPIPATE                    | 2089769  |
| ESTROPIPATE                    | 282677   |
| ESTROPIPATE                    | 2089777  |
| ESTROPIPATE                    | 2089793  |
| ESTRADIOL/NORETH AC            | 2108186  |
| NORGESTIMATE-ETHINYL ESTRADIOL | 2229064  |
| NORGESTIMATE-ETHINYL ESTRADIOL | 2229218  |
| NORGESTIMATE-ETHINYL ESTRADIOL | 2229226  |
| ETHINYL ESTRADIOL/CYPROTERONE  | 2233542  |
| ETHINYL ESTRADIOL/NORELGEST    | 2246340  |
| NO GENERIC FORMULARY           | 66124057 |
| NO GENERIC FORMULARY           | 66124058 |
| NO GENERIC FORMULARY           | 66124060 |
| NO GENERIC FORMULARY           | 66124061 |
| NO GENERIC FORMULARY           | 66124062 |
| NO GENERIC FORMULARY           | 66124063 |
| NO GENERIC FORMULARY           | 66124064 |

---

**Progestogens**

---

**Progesterone**

---

|                          |          |
|--------------------------|----------|
| PROGESTERONE,MICRONIZED  | 2241013  |
| MEDROXYPROGESTERONE ACET | 30848    |
| MEDROXYPROGESTERONE ACET | 30856    |
| MEDROXYPROGESTERONE ACET | 585092   |
| NO GENERIC FORMULARY     | 66123240 |
| MEDROXYPROGESTERONE ACET | 708917   |
| MEDROXYPROGESTERONE ACET | 2148552  |
| MEDROXYPROGESTERONE ACET | 2221284  |
| MEDROXYPROGESTERONE ACET | 2229838  |
| MEDROXYPROGESTERONE ACET | 2244726  |

## Supplementary material

|    |                               |         |
|----|-------------------------------|---------|
| 1  |                               |         |
| 2  |                               |         |
| 3  | MEDROXYPROGESTERONE ACET      | 2246627 |
| 4  | MEDROXYPROGESTERONE ACET      | 30937   |
| 5  | MEDROXYPROGESTERONE ACET      | 2010739 |
| 6  | MEDROXYPROGESTERONE ACET      | 2148560 |
| 7  | MEDROXYPROGESTERONE ACET      | 2221292 |
| 8  | MEDROXYPROGESTERONE ACET      | 2229839 |
| 9  | MEDROXYPROGESTERONE ACET      | 2244727 |
| 10 | MEDROXYPROGESTERONE ACET      | 2246628 |
| 11 | MEDROXYPROGESTERONE ACET      | 729973  |
| 12 | MEDROXYPROGESTERONE ACET      | 2010933 |
| 13 | MEDROXYPROGESTERONE ACET      | 2148579 |
| 14 | MEDROXYPROGESTERONE ACET      | 2221306 |
| 15 | MEDROXYPROGESTERONE ACET      | 2229840 |
| 16 | MEDROXYPROGESTERONE ACET      | 2246629 |
| 17 | MEDROXYPROGESTERONE ACET      | 30945   |
| 18 | MEDROXYPROGESTERONE ACET      | 2267640 |
| 19 | MEDROXYPROGESTERONE ACET      | 2267640 |
| 20 | MEDROXYPROGESTERONE ACET      | 2267640 |
| 21 | MEDROXYPROGESTERONE ACET      | 2267640 |
| 22 | MEDROXYPROGESTERONE ACET      | 2267640 |
| 23 | MEDROXYPROGESTERONE ACET      | 2267640 |
| 24 | MEDROXYPROGESTERONE ACET      | 2267640 |
| 25 | MEDROXYPROGESTERONE ACET      | 2267640 |
| 26 | MEDROXYPROGESTERONE ACET      | 2267640 |
| 27 | MEDROXYPROGESTERONE ACET      | 2267640 |
| 28 | MEDROXYPROGESTERONE ACET      | 2267640 |
| 29 | MEDROXYPROGESTERONE ACET      | 2267640 |
| 30 | MEDROXYPROGESTERONE ACET      | 2267640 |
| 31 | MEDROXYPROGESTERONE ACET      | 2267640 |
| 32 | MEDROXYPROGESTERONE ACET      | 2267640 |
| 33 | <b>Transmasculine</b>         |         |
| 34 | <b>Testosterone</b>           |         |
| 35 | TESTOSTERONE                  | 2249499 |
| 36 | TESTOSTERONE CYPIONATE        | 30783   |
| 37 | TESTOSTERONE PROPIONATE       | 1977571 |
| 38 | TESTOSTERONE CYPIONATE        | 1977601 |
| 39 | TESTOSTERONE CYPIONATE        | 2220318 |
| 40 | TESTOSTERONE CYPIONATE        | 2246063 |
| 41 | TESTOSTERONE ENANTHATE        | 29246   |
| 42 | TESTOSTERONE ENANTHATE        | 716936  |
| 43 | TESTOSTERONE ENANTHATE        | 739944  |
| 44 | TESTOSTERONE UNDECANOATE      | 782327  |
| 45 | TESTOSTERONE ENANTHATE/ESTRAD | 108278  |
| 46 | TESTOSTERONE ENANTHATE/ESTRAD | 2061031 |
| 47 | TESTOSTERONE                  | 2239653 |
| 48 | TESTOSTERONE                  | 2245346 |
| 49 | TESTOSTERONE                  | 2245345 |
| 50 | TESTOSTERONE                  | 2245972 |
| 51 |                               |         |
| 52 |                               |         |
| 53 |                               |         |
| 54 |                               |         |
| 55 |                               |         |
| 56 |                               |         |
| 57 |                               |         |
| 58 |                               |         |
| 59 |                               |         |
| 60 |                               |         |

## Supplementary material

**Chronic condition case definitions**

| <b>Chronic condition</b> |                             | <b>Case definition</b>                                                                                                                                                                                                                                                                                                                                                                  | <b>Codes</b>                                                                                                                                                                                                                                                                                                          |
|--------------------------|-----------------------------|-----------------------------------------------------------------------------------------------------------------------------------------------------------------------------------------------------------------------------------------------------------------------------------------------------------------------------------------------------------------------------------------|-----------------------------------------------------------------------------------------------------------------------------------------------------------------------------------------------------------------------------------------------------------------------------------------------------------------------|
| Cardiovascular disease*  | Acute myocardial infarction | 1 or more hospitalizations with relevant ICD codes                                                                                                                                                                                                                                                                                                                                      | ICD-10:<br>I21 Acute myocardial infarction<br>I22 Subsequent myocardial infarction                                                                                                                                                                                                                                    |
|                          | Ischemic heart disease      | At least one of the following:<br><br>2 medical visits with Angina ICD-9 code 413 plus 1 heart disease prescription in 365 days; or 1 specialist visit with Angina ICD-9 code 413 plus 1 prescription in 365 days; or 2 medical visits with two ICD9 codes 410, 411, 412, 413, 414 in 365 days; or 1 CCI/CCP CABG,PCI/PCTA procedure code; or 1 hospitalization with relevant ICD code. | ICD-9:<br>410 Acute myocardial infarction<br>ICD-10:<br>I20 Angina pectoris<br>I21 Acute myocardial infarction I<br>22 Subsequent myocardial infarction<br>I23 Certain current complications following acute myocardial infarction<br>I24 Other acute ischaemic heart diseases<br>I25 Chronic ischaemic heart disease |
|                          | Chronic heart failure       | 1 or more hospitalizations or 2 or more medical visits in 365 days with relevant ICD codes                                                                                                                                                                                                                                                                                              | ICD-9:<br>410 Acute myocardial infarction<br>411 Other acute and subacute forms of ischaemic heart disease<br>412 Old myocardial infarction<br>413 Angina pectoris<br>414 Other forms of chronic ischaemic heart disease<br>ICD-10:<br>I50 Heart failure                                                              |
|                          | Stroke- hospital            | 1 or more hospitalizations with relevant ICD codes                                                                                                                                                                                                                                                                                                                                      | ICD-9:<br>428 Heart failure<br>ICD-10:<br>H34.1 Central retinal artery occlusion<br>I60 Subarachnoid hemorrhage<br>I61 Intracerebral haemorrhage<br>I63 Cerebral infarction (exclude<br>I63.6 Cerebral infarction due to                                                                                              |

## Supplementary material

cerebral venous thrombosis, nonpyogenic)  
 I64 Stroke, not specified as haemorrhage or infarction  
 362.3 Retinal vascular occlusion  
 430 Subarachnoid hemorrhage  
 431 Intracerebral hemorrhage  
 433.x1 Occlusion and stenosis of precerebral arteries  
 434.x Occlusion cerebral arteries  
 436 Acute but ill-defined cerebrovascular disease

*Excludes any traumatic brain injury*

Transient ischemic attack

1 or more hospitalizations with relevant ICD codes

ICD-10:  
 H34.0 Transient retinal artery occlusion  
 G45.0 Vertebro-basilar artery syndrome  
 G45.1 Carotid artery syndrome (hemispheric)  
 G45.2 Multiple and bilateral precerebral artery syndromes  
 G45.3 Amaurosis fugax  
 G45.8 Other transient cerebral ischemic attacks and related syndromes  
 G45.9 Transient cerebral ischemic attack, unspecified

ICD-9:

435 Transient cerebral ischemia

*Excludes any traumatic brain injury*

Chronic kidney disease\*

1 or more hospitalizations or 2 or more medical visits in 365 days with relevant ICD codes

ICD-10:  
 N01 Rapidly progressive nephritic syndrome  
 N03 Chronic nephritic syndrome  
 N04 Nephrotic syndrome  
 N05 Unspecified nephritic syndrome  
 N06 Isolated proteinuria with specified morphological lesion  
 N07 Hereditary nephropathy, not elsewhere classified

## Supplementary material

N18 Chronic kidney disease  
 N19 Unspecified kidney failure  
 N26 Unspecified contracted  
 kidney  
 N27 Small kidney of unknown  
 cause

## ICD-9:

581 Nephrotic syndrome 582  
 Chronic glomerulonephritis  
 583 Nephritis and nephropathy,  
 not specified as acute or chronic  
 585 Chronic renal failure 586  
 Renal failure, unspecified  
 587 Renal sclerosis, unspecified  
 589 Small kidney of unknown  
 cause

Chronic liver disease

1 or more  
 hospitalization or  
 medical visit with  
 relevant diagnosis  
 within 365 days

## ICD-9:

571.0 Alcoholic fatty liver  
 571.2 Alcoholic cirrhosis of liver  
 571.3 Alcoholic liver damage,  
 unspecified  
 571.4 Chronic hepatitis  
 571.5 Cirrhosis of liver without  
 mention of alcohol  
 571.6 Billiary cirrhosis  
 571.8 Other chronic nonalcoholic  
 liver disease  
 571.9 Unspecified chronic liver  
 disease without mention of  
 alcohol  
 070.3 Viral hepatitis B without  
 mention of hepatic coma  
 070.30 Viral hepatitis B without  
 mention of hepatic coma, acute or  
 unspecified, without mention of  
 hepatitis delta  
 070.31 Viral hepatitis B without  
 mention of hepatic coma, acute or  
 unspecified, with hepatitis delta  
 070.32 Viral hepatitis B without  
 mention of hepatic coma, chronic,  
 without mention of hepatitis delta  
 070.33 Viral hepatitis B without  
 mention of hepatic coma, chronic,  
 with hepatitis delta

## Supplementary material

070.52 Hepatitis delta without mention of active Hepatitis B disease or hepatic coma  
 V02.61 Hepatitis B carrier  
 070.42 Hepatitis delta without mention of active Hepatitis B disease with hepatic coma  
 070.54 Chronic hepatitis C without mention of hepatic coma  
 V02.62 Hepatitis C carrier

ICD-10:  
 J41 Simple and mucopurulent chronic bronchitis  
 J42 Unspecified chronic bronchitis  
 J43 Emphysema  
 J44 Other chronic obstructive pulmonary disease

ICD-9:  
 491 Chronic bronchitis  
 492 Emphysema  
 496 Chronic airways obstruction, not elsewhere classified

ICD-10:  
 E10 Type 1 diabetes mellitus  
 E11 Type 2 diabetes mellitus  
 E13 Other specified diabetes mellitus  
 E14 Unspecified diabetes mellitus

ICD-9:  
 250 Diabetes mellitus

Chronic Obstructive  
 Pulmonary Disease\*

1 or more hospitalization or 2 or more medical visits within 365 days

Diabetes Mellitus\*

At least 1 of the following:  
 1 hospitalization or 2 medical visits in 365 days with relevant ICD codes; or 2 or more insulin prescriptions in 365 days; or 2 or more oral antihyperglycemic (not including metformin) prescriptions in 365 days; or 1 insulin and 1 oral antihyperglycemic (including metformin) in 365 days; or 2 metformin prescriptions and 1 medical visit in one year with relevant ICD codes.



## Supplementary material

## Hypertension\*

*Excludes gestational diabetes.*

1 or more hospitalizations or 2 or more medical visits within 2 years with relevant ICD codes.

*Excludes gestational hypertension.*

ICD-10:

I10 Essential (primary) hypertension

I11 Hypertensive heart disease

I12 Hypertensive renal disease

I13 Hypertensive heart and renal disease

I15 Secondary hypertension

ICD-9:

401 Essential hypertension

402 Hypertensive heart disease

403 Hypertensive renal disease

404 Hypertensive heart and renal disease

405 Secondary hypertension

ICD-10:

F30 Manic episode

F31 Bipolar affective disorder

F32 Depressive episode F33

Recurrent depressive disorder

F34 Persistent mood [affective] disorders

F38 Other mood [affective] disorders

F39 Unspecified mood [affective] disorder

F40 Phobic anxiety disorders

F41 Other anxiety disorders

F42 Obsessive-compulsive disorder

F43 Reaction to severe stress, and adjustment disorders

F44 Dissociative (conversion) disorders F45 Somatoform disorders

F48 Other neurotic disorders

F68 Other disorders of adult personality & behavior

F68 Other disorders of adult personality & behavior

ICD-9:

## Mood and anxiety disorders\*

1 or more hospitalizations with a relevant ICD code or 2 or more medical visits with a relevant code within 2 years

## Supplementary material

296 Affective psychoses 300  
Neurotic disorders 311 Depressive  
disorder, not elsewhere classified

MSP DX Code:  
50B Anxiety/Depression  
*Cancer case definition details  
available from the British  
Columbia Cancer Agency:  
[http://www.bccancer.bc.ca/health-  
info/types-of-cancer](http://www.bccancer.bc.ca/health-info/types-of-cancer)*

Non-AIDS defining  
cancer† All prevalent cancer  
cases were included,  
with the exception of  
AIDS defining  
malignancies  
(Kaposi's sarcoma,  
non-Hodgkin's  
lymphoma, invasive  
cervical cancer)

Organic mental  
disorders 1 or more medical  
visits or  
hospitalizations with  
relevant diagnoses  
within 365 days

ICD-9:  
290.x Dementias  
294.x Other organic psychotic  
conditions  
331.x Alzheimer's

ICD-10:  
F00.x Dementia in Alzheimer's  
disease  
F01.x Vascular Dementia  
F02.x Dementia in other disease  
classified elsewhere  
F03.x Unspecified dementia  
F04 Amnesic disorder due to  
physiological condition  
F06 Other mental disorders due to  
known physiological condition  
F09 Unspecified mental disorder  
due to known physiological  
condition  
G30 Alzheimer's disease with  
early onset  
ICD-10:  
M15 Polyarthrosis  
M16 Coxarthrosis [arthrosis of  
hip]  
M17 Gonarthrosis [arthrosis of  
knee]  
M18 Arthrosis of first  
carpometacarpal joint  
M19 Other arthrosis

Osteoarthritis\* 1 or more  
hospitalization or 2 or  
more medical visits in  
365 days with a  
relevant ICD code

## Supplementary material

|    |                       |                          |                                    |
|----|-----------------------|--------------------------|------------------------------------|
| 1  |                       |                          |                                    |
| 2  |                       |                          |                                    |
| 3  |                       |                          |                                    |
| 4  |                       |                          |                                    |
| 5  |                       |                          | ICD-9:                             |
| 6  |                       |                          | 715 Osteoarthritis and allied      |
| 7  |                       |                          | disorders                          |
| 8  | Personality disorder  | 1 or more                | ICD-9:                             |
| 9  |                       | hospitalizations or      | 301.x Personality disorders        |
| 10 |                       | medical visits with a    |                                    |
| 11 |                       | relevant diagnosis       | ICD-10:                            |
| 12 |                       | within 365 days          | F60.x Specified personality        |
| 13 |                       |                          | disorders                          |
| 14 |                       |                          | F62 Enduring personality           |
| 15 |                       |                          | changes, not attributable to brain |
| 16 |                       |                          | damage and disease                 |
| 17 |                       |                          | F68.1 Intentional production or    |
| 18 |                       |                          | feigning of symptoms or            |
| 19 |                       |                          | disabilities, either physical or   |
| 20 |                       |                          | psychological                      |
| 21 |                       |                          | F68.8 Other specified disorders or |
| 22 |                       |                          | adult personality and behaviour    |
| 23 |                       |                          | F69 Unspecified disorder or adult  |
| 24 |                       |                          | personality and behaviour          |
| 25 |                       |                          | ICD-9:                             |
| 26 |                       |                          | 295.x Schizophrenic disorders      |
| 27 | Schizophrenia related | 1 or more medical visit  | 297.0 Paranoid state, simple       |
| 28 | disorder              | or hospitalizations with | 297.1 Delusional disorder          |
| 29 |                       | relevant diagnoses       | 297.2 Paraphrenia                  |
| 30 |                       | within 365 days          | 297.3 Shared psychotic disorder    |
| 31 |                       |                          |                                    |
| 32 |                       |                          | ICD-10:                            |
| 33 |                       |                          | F20.x Paranoid schizophrenia       |
| 34 |                       |                          | F21.x Schizotypal disorder         |
| 35 |                       |                          | F23.2 Acute schizophrenia-like     |
| 36 |                       |                          | psychotic disorder                 |
| 37 |                       |                          | F25.x Schizoaffective disorders    |
| 38 |                       |                          |                                    |
| 39 |                       |                          |                                    |
| 40 |                       |                          |                                    |
| 41 |                       |                          |                                    |
| 42 |                       |                          |                                    |

\* Case definition adapted from British Columbia Ministry of Health version 2017, April 4 2019 update

† Case-definition adapted from British Columbia Cancer Agency

**The RECORD statement – checklist of items, extended from the STROBE statement, that should be reported in observational studies using routinely collected health data.**

|                           | Item No. | STROBE items                                                                                                                                                                               | Location in manuscript where items are reported | RECORD items                                                                                                                                                                                                                                                                                                                                                                                                                                | Location in manuscript where items are reported |
|---------------------------|----------|--------------------------------------------------------------------------------------------------------------------------------------------------------------------------------------------|-------------------------------------------------|---------------------------------------------------------------------------------------------------------------------------------------------------------------------------------------------------------------------------------------------------------------------------------------------------------------------------------------------------------------------------------------------------------------------------------------------|-------------------------------------------------|
| <b>Title and abstract</b> |          |                                                                                                                                                                                            |                                                 |                                                                                                                                                                                                                                                                                                                                                                                                                                             |                                                 |
|                           | 1        | (a) Indicate the study's design with a commonly used term in the title or the abstract (b) Provide in the abstract an informative and balanced summary of what was done and what was found |                                                 | RECORD 1.1: The type of data used should be specified in the title or abstract. When possible, the name of the databases used should be included.<br><br>RECORD 1.2: If applicable, the geographic region and timeframe within which the study took place should be reported in the title or abstract.<br><br>RECORD 1.3: If linkage between databases was conducted for the study, this should be clearly stated in the title or abstract. | 1.1-3: Title page                               |
| <b>Introduction</b>       |          |                                                                                                                                                                                            |                                                 |                                                                                                                                                                                                                                                                                                                                                                                                                                             |                                                 |
| Background rationale      | 2        | Explain the scientific background and rationale for the investigation being reported                                                                                                       |                                                 |                                                                                                                                                                                                                                                                                                                                                                                                                                             | Introduction (pp 4-5)                           |
| Objectives                | 3        | State specific objectives, including any prespecified hypotheses                                                                                                                           |                                                 |                                                                                                                                                                                                                                                                                                                                                                                                                                             | Introduction (page 5)                           |
| <b>Methods</b>            |          |                                                                                                                                                                                            |                                                 |                                                                                                                                                                                                                                                                                                                                                                                                                                             |                                                 |
| Study Design              | 4        | Present key elements of study design early in the paper                                                                                                                                    |                                                 |                                                                                                                                                                                                                                                                                                                                                                                                                                             | Methods (page 5); Supplementary Material        |
| Setting                   | 5        | Describe the setting, locations, and relevant dates, including periods of recruitment, exposure, follow-up, and data collection                                                            |                                                 |                                                                                                                                                                                                                                                                                                                                                                                                                                             | Methods (page 5)                                |

|                                                                                                                                                                                                            |          |                                                                                                                                                                                                                                                                                                                                                                                                                                                                                                                                                                                                                                                                                                                        |  |                                                                                                                                                                                                                                                                                                                                                                                                                                                                                                                                                                                                                                                                                                      |                                                                                                            |
|------------------------------------------------------------------------------------------------------------------------------------------------------------------------------------------------------------|----------|------------------------------------------------------------------------------------------------------------------------------------------------------------------------------------------------------------------------------------------------------------------------------------------------------------------------------------------------------------------------------------------------------------------------------------------------------------------------------------------------------------------------------------------------------------------------------------------------------------------------------------------------------------------------------------------------------------------------|--|------------------------------------------------------------------------------------------------------------------------------------------------------------------------------------------------------------------------------------------------------------------------------------------------------------------------------------------------------------------------------------------------------------------------------------------------------------------------------------------------------------------------------------------------------------------------------------------------------------------------------------------------------------------------------------------------------|------------------------------------------------------------------------------------------------------------|
| <p>1<br/>2<br/>3<br/>4<br/>5<br/>6<br/>7<br/>8<br/>9<br/>10<br/>11<br/>12<br/>13<br/>14<br/>15<br/>16<br/>17<br/>18<br/>19<br/>20<br/>21<br/>22<br/>23<br/>24<br/>25<br/>26<br/>27</p> <p>Participants</p> | <p>6</p> | <p>(a) <i>Cohort study</i> - Give the eligibility criteria, and the sources and methods of selection of participants. Describe methods of follow-up<br/> <i>Case-control study</i> - Give the eligibility criteria, and the sources and methods of case ascertainment and control selection. Give the rationale for the choice of cases and controls<br/> <i>Cross-sectional study</i> - Give the eligibility criteria, and the sources and methods of selection of participants</p> <p>(b) <i>Cohort study</i> - For matched studies, give matching criteria and number of exposed and unexposed<br/> <i>Case-control study</i> - For matched studies, give matching criteria and the number of controls per case</p> |  | <p>RECORD 6.1: The methods of study population selection (such as codes or algorithms used to identify subjects) should be listed in detail. If this is not possible, an explanation should be provided.</p> <p>RECORD 6.2: Any validation studies of the codes or algorithms used to select the population should be referenced. If validation was conducted for this study and not published elsewhere, detailed methods and results should be provided.</p> <p>RECORD 6.3: If the study involved linkage of databases, consider use of a flow diagram or other graphical display to demonstrate the data linkage process, including the number of individuals with linked data at each stage.</p> | <p>6.1: Methods (pp 6-7);<br/>Supplementary Material</p> <p>6.2: Methods (pp 6-7)</p> <p>6.3: Figure 1</p> |
| <p>28<br/>29<br/>30<br/>31<br/>32<br/>33<br/>34</p> <p>Variables</p>                                                                                                                                       | <p>7</p> | <p>Clearly define all outcomes, exposures, predictors, potential confounders, and effect modifiers. Give diagnostic criteria, if applicable.</p>                                                                                                                                                                                                                                                                                                                                                                                                                                                                                                                                                                       |  | <p>RECORD 7.1: A complete list of codes and algorithms used to classify exposures, outcomes, confounders, and effect modifiers should be provided. If these cannot be reported, an explanation should be provided.</p>                                                                                                                                                                                                                                                                                                                                                                                                                                                                               | <p>7.1: Methods (pp 6-7);<br/>Supplementary Material</p>                                                   |
| <p>35<br/>36<br/>37<br/>38<br/>39<br/>40<br/>41<br/>42<br/>43<br/>44<br/>45<br/>46<br/>47</p> <p>Data sources/<br/>measurement</p>                                                                         | <p>8</p> | <p>For each variable of interest, give sources of data and details of methods of assessment (measurement). Describe comparability of assessment methods if there is more than one group</p>                                                                                                                                                                                                                                                                                                                                                                                                                                                                                                                            |  |                                                                                                                                                                                                                                                                                                                                                                                                                                                                                                                                                                                                                                                                                                      | <p>Methods (pp 6-7)</p>                                                                                    |

|                                                                                                                                              |                                  |    |                                                                                                                                                                                                                                                                                                                                                                                                                                                                                                                                                                      |  |                                                                                                                                                       |                            |
|----------------------------------------------------------------------------------------------------------------------------------------------|----------------------------------|----|----------------------------------------------------------------------------------------------------------------------------------------------------------------------------------------------------------------------------------------------------------------------------------------------------------------------------------------------------------------------------------------------------------------------------------------------------------------------------------------------------------------------------------------------------------------------|--|-------------------------------------------------------------------------------------------------------------------------------------------------------|----------------------------|
| 1<br>2<br>3<br>4<br>5<br>6<br>7<br>8<br>9<br>10                                                                                              | Bias                             | 9  | Describe any efforts to address potential sources of bias                                                                                                                                                                                                                                                                                                                                                                                                                                                                                                            |  |                                                                                                                                                       | Discussion (pp 9, 11)      |
| 11<br>12<br>13<br>14<br>15<br>16<br>17<br>18<br>19<br>20<br>21<br>22<br>23<br>24<br>25<br>26<br>27<br>28<br>29<br>30<br>31<br>32<br>33<br>34 | Study size                       | 10 | Explain how the study size was arrived at                                                                                                                                                                                                                                                                                                                                                                                                                                                                                                                            |  |                                                                                                                                                       | Methods (page 6); Figure 1 |
| 35<br>36<br>37<br>38<br>39<br>40<br>41<br>42<br>43<br>44<br>45<br>46<br>47                                                                   | Quantitative variables           | 11 | Explain how quantitative variables were handled in the analyses. If applicable, describe which groupings were chosen, and why                                                                                                                                                                                                                                                                                                                                                                                                                                        |  |                                                                                                                                                       | Methods (pp 6-7)           |
|                                                                                                                                              | Statistical methods              | 12 | (a) Describe all statistical methods, including those used to control for confounding<br>(b) Describe any methods used to examine subgroups and interactions<br>(c) Explain how missing data were addressed<br>(d) <i>Cohort study</i> - If applicable, explain how loss to follow-up was addressed<br><i>Case-control study</i> - If applicable, explain how matching of cases and controls was addressed<br><i>Cross-sectional study</i> - If applicable, describe analytical methods taking account of sampling strategy<br>(e) Describe any sensitivity analyses |  |                                                                                                                                                       | Methods (pp 6-7)           |
|                                                                                                                                              | Data access and cleaning methods |    | ..                                                                                                                                                                                                                                                                                                                                                                                                                                                                                                                                                                   |  | RECORD 12.1: Authors should describe the extent to which the investigators had access to the database population used to create the study population. | 12.1-2: Methods            |

|                  |    |                                                                                                                                                                                                                                                                                                                                                 |  |                                                                                                                                                                                                                                                                                                                    |                               |
|------------------|----|-------------------------------------------------------------------------------------------------------------------------------------------------------------------------------------------------------------------------------------------------------------------------------------------------------------------------------------------------|--|--------------------------------------------------------------------------------------------------------------------------------------------------------------------------------------------------------------------------------------------------------------------------------------------------------------------|-------------------------------|
|                  |    |                                                                                                                                                                                                                                                                                                                                                 |  | RECORD 12.2: Authors should provide information on the data cleaning methods used in the study.                                                                                                                                                                                                                    |                               |
| Linkage          |    | ..                                                                                                                                                                                                                                                                                                                                              |  | RECORD 12.3: State whether the study included person-level, institutional-level, or other data linkage across two or more databases. The methods of linkage and methods of linkage quality evaluation should be provided.                                                                                          | Methods (page 5)              |
| <b>Results</b>   |    |                                                                                                                                                                                                                                                                                                                                                 |  |                                                                                                                                                                                                                                                                                                                    |                               |
| Participants     | 13 | (a) Report the numbers of individuals at each stage of the study ( <i>e.g.</i> , numbers potentially eligible, examined for eligibility, confirmed eligible, included in the study, completing follow-up, and analysed)<br>(b) Give reasons for non-participation at each stage.<br>(c) Consider use of a flow diagram                          |  | RECORD 13.1: Describe in detail the selection of the persons included in the study ( <i>i.e.</i> , study population selection) including filtering based on data quality, data availability and linkage. The selection of included persons can be described in the text and/or by means of the study flow diagram. | Results (page 8);<br>Figure 1 |
| Descriptive data | 14 | (a) Give characteristics of study participants ( <i>e.g.</i> , demographic, clinical, social) and information on exposures and potential confounders<br>(b) Indicate the number of participants with missing data for each variable of interest<br>(c) <i>Cohort study</i> - summarise follow-up time ( <i>e.g.</i> , average and total amount) |  |                                                                                                                                                                                                                                                                                                                    | Results (page 8)              |
| Outcome data     | 15 | <i>Cohort study</i> - Report numbers of outcome events or summary measures over time<br><i>Case-control study</i> - Report numbers in each exposure                                                                                                                                                                                             |  |                                                                                                                                                                                                                                                                                                                    | Results                       |

|                   |    |                                                                                                                                                                                                                                                                                                                                                                                                                 |  |                                                                                                                                                                                                                                                                                                          |                             |
|-------------------|----|-----------------------------------------------------------------------------------------------------------------------------------------------------------------------------------------------------------------------------------------------------------------------------------------------------------------------------------------------------------------------------------------------------------------|--|----------------------------------------------------------------------------------------------------------------------------------------------------------------------------------------------------------------------------------------------------------------------------------------------------------|-----------------------------|
|                   |    | category, or summary measures of exposure<br><i>Cross-sectional study</i> - Report numbers of outcome events or summary measures                                                                                                                                                                                                                                                                                |  |                                                                                                                                                                                                                                                                                                          |                             |
| Main results      | 16 | (a) Give unadjusted estimates and, if applicable, confounder-adjusted estimates and their precision (e.g., 95% confidence interval). Make clear which confounders were adjusted for and why they were included<br>(b) Report category boundaries when continuous variables were categorized<br>(c) If relevant, consider translating estimates of relative risk into absolute risk for a meaningful time period |  |                                                                                                                                                                                                                                                                                                          | NA                          |
| Other analyses    | 17 | Report other analyses done— e.g., analyses of subgroups and interactions, and sensitivity analyses                                                                                                                                                                                                                                                                                                              |  |                                                                                                                                                                                                                                                                                                          | NA                          |
| <b>Discussion</b> |    |                                                                                                                                                                                                                                                                                                                                                                                                                 |  |                                                                                                                                                                                                                                                                                                          |                             |
| Key results       | 18 | Summarise key results with reference to study objectives                                                                                                                                                                                                                                                                                                                                                        |  |                                                                                                                                                                                                                                                                                                          | Discussion: Page 9          |
| Limitations       | 19 | Discuss limitations of the study, taking into account sources of potential bias or imprecision. Discuss both direction and magnitude of any potential bias                                                                                                                                                                                                                                                      |  | RECORD 19.1: Discuss the implications of using data that were not created or collected to answer the specific research question(s). Include discussion of misclassification bias, unmeasured confounding, missing data, and changing eligibility over time, as they pertain to the study being reported. | Discussion: Page 9, Page 11 |
| Interpretation    | 20 | Give a cautious overall interpretation of results considering objectives,                                                                                                                                                                                                                                                                                                                                       |  |                                                                                                                                                                                                                                                                                                          | Conclusion (Page 11)        |



|                                                           |    |                                                                                                                                                               |  |                                                                                                                                                          |                      |
|-----------------------------------------------------------|----|---------------------------------------------------------------------------------------------------------------------------------------------------------------|--|----------------------------------------------------------------------------------------------------------------------------------------------------------|----------------------|
|                                                           |    | limitations, multiplicity of analyses, results from similar studies, and other relevant evidence                                                              |  |                                                                                                                                                          |                      |
| Generalisability                                          | 21 | Discuss the generalisability (external validity) of the study results                                                                                         |  |                                                                                                                                                          | Limitations (Page 9) |
| <b>Other Information</b>                                  |    |                                                                                                                                                               |  |                                                                                                                                                          |                      |
| Funding                                                   | 22 | Give the source of funding and the role of the funders for the present study and, if applicable, for the original study on which the present article is based |  |                                                                                                                                                          | Funding (Page 12)    |
| Accessibility of protocol, raw data, and programming code |    | ..                                                                                                                                                            |  | RECORD 22.1: Authors should provide information on how to access any supplemental information such as the study protocol, raw data, or programming code. | Page 12              |

\*Reference: Benchimol EI, Smeeth L, Guttman A, Harron K, Moher D, Petersen I, Sørensen HT, von Elm E, Langan SM, the RECORD Working Committee. The REporting of studies Conducted using Observational Routinely-collected health Data (RECORD) Statement. *PLoS Medicine* 2015; in press.

\*Checklist is protected under Creative Commons Attribution ([CC BY](https://creativecommons.org/licenses/by/4.0/)) license.
