# Supplementary material for: Development of a computable phenotype to identify a transgender sample for health research purposes: a feasibility study in a large linked provincial healthcare administrative cohort in British Columbia, Canada
Source: PubMed Central journal article supplement — BMJ Open. 2021 Mar 25;11(3):e040928. doi: 10.1136/bmjopen-2020-040928 (PMC7996659; doi:10.1136/bmjopen-2020-040928), 2021-03-25
Supplement: bmjopen-2020-040928supp001.pdf [file bmjopen-2020-040928supp001.pdf]

## Supplementary material

**Data sources and description of data elements**

| <b>Data source</b>          | <b>Data steward</b>                                            | <b>Description</b>                                                                                                                                                                                                                             | <b>Data elements provided for this study</b> |
|-----------------------------|----------------------------------------------------------------|------------------------------------------------------------------------------------------------------------------------------------------------------------------------------------------------------------------------------------------------|----------------------------------------------|
| Medical Services Plan       | British Columbia Ministry of Health                            | For individuals covered by the provincial universal health insurance plan- Medically necessary services provided by fee-for-service physicians and other healthcare providers, laboratory services, diagnostic procedures, dental/oral surgery | ICD-9 and ICD-10 codes                       |
| Consolidation file          | British Columbia Ministry of Health                            | Demographic data on individuals receiving or registered to receive care in BC, pooled from multiple PopData sources                                                                                                                            | Sociodemographics                            |
| Discharge Abstract Database | British Columbia Ministry of Health                            | Demographic, administrative and clinical data for inpatient hospital discharges and day surgeries                                                                                                                                              | ICD-9 and ICD-10 codes                       |
| Vital statistics deaths     | British Columbia Vital Statistics Agency                       | Records of all registered deaths in BC                                                                                                                                                                                                         | Death data                                   |
| Pharmacare                  | British Columbia Ministry of Health                            | Data related to prescription drugs dispensed under the BC public drug insurance program.                                                                                                                                                       | Prescription drug name/identifier            |
| Pharmanet                   | British Columbia Ministry of Health Data Stewardship Committee | Data related to prescription drugs dispensed by community and outpatient pharmacies                                                                                                                                                            | Prescription drug name/identifier            |

## Supplementary material

|                                       |                                                    |                                                                                                                                                                   |                                                                            |
|---------------------------------------|----------------------------------------------------|-------------------------------------------------------------------------------------------------------------------------------------------------------------------|----------------------------------------------------------------------------|
| Drug Treatment Program and laboratory | British Columbia Centre for Excellence in HIV/AIDS | Antiretroviral therapy use history, laboratory testing, immunological and virologic testing, and demographic data on PLWH who have accessed antiretrovirals in BC | Providers-reported transgender status, laboratory confirmed HIV serostatus |
|---------------------------------------|----------------------------------------------------|-------------------------------------------------------------------------------------------------------------------------------------------------------------------|----------------------------------------------------------------------------|

**Prescription drugs with drug identification numbers (DIN)s**

|                          | Generic Name                   | DIN     |
|--------------------------|--------------------------------|---------|
| <b>Transfeminine</b>     |                                |         |
| <b>Androgen Blockers</b> |                                |         |
| <b>Spironolactone</b>    |                                |         |
|                          | SPIRONOLACTONE                 | 28606   |
|                          | SPIRONOLACTONE                 | 613215  |
|                          | SPIRONOLACTONE                 | 285455  |
|                          | SPIRONOLACTONE                 | 613223  |
|                          | SPIRONOLACT/HYDROCHLOROTHIAZID | 180408  |
|                          | SPIRONOLACT/HYDROCHLOROTHIAZID | 613231  |
|                          | SPIRONOLACT/HYDROCHLOROTHIAZID | 594377  |
|                          | SPIRONOLACT/HYDROCHLOROTHIAZID | 657182  |
| <b>Cyproterone</b>       |                                |         |
|                          | ETHINYL ESTRADIOL/CYPROTERONE  | 2233542 |
|                          | NO GENERIC FORMULARY           | 634514  |
|                          | CYPROTERONE ACETATE            | 704431  |
|                          | CYPROTERONE ACETATE            | 2229449 |
|                          | CYPROTERONE ACETATE            | 2229723 |
|                          | CYPROTERONE ACETATE            | 2232872 |
|                          | CYPROTERONE ACETATE            | 2245898 |
|                          | CYPROTERONE ACETATE            | 704423  |
| <b>Finasteride</b>       |                                |         |
|                          | FINASTERIDE                    | 2010909 |
|                          | FINASTERIDE                    | 2238213 |
| <b>Dutasteride</b>       |                                |         |
|                          | DUTASTERIDE                    | 2247813 |
| <b>Estrogens</b>         |                                |         |
| <b>Estrogen</b>          |                                |         |
|                          | ESTROGENS,CONJUGATED           | 830240  |
|                          | ESTROGENS,CONJUGATED           | 831395  |

## Supplementary material

|                                |         |
|--------------------------------|---------|
| ETHYNODIOL D-ETHINYL ESTRADIOL | 28630   |
| ETHYNODIOL D-ETHINYL ESTRADIOL | 469327  |
| NORETHINDRONE-MESTRANOL        | 22608   |
| NORETHINDRONE-MESTRANOL        | 22659   |
| NORETHINDRONE A-E ESTRADIOL    | 297143  |
| NORETHINDRONE A-E ESTRADIOL    | 315966  |
| NORETHINDRONE-ETHINYL ESTRAD   | 317047  |
| NORETHINDRONE-ETHINYL ESTRAD   | 372846  |
| NORETHINDRONE-ETHINYL ESTRAD   | 373265  |
| NORETHINDRONE-ETHINYL ESTRAD   | 531006  |
| NORETHINDRONE-ETHINYL ESTRAD   | 538590  |
| NORETHINDRONE-ETHINYL ESTRAD   | 602957  |
| NORETHINDRONE-ETHINYL ESTRAD   | 620947  |
| NORETHINDRONE-ETHINYL ESTRAD   | 2187086 |
| NORETHINDRONE-ETHINYL ESTRAD   | 2187108 |
| NORETHINDRONE-ETHINYL ESTRAD   | 2189054 |
| NORGESTREL-ETHINYL ESTRADIOL   | 34207   |
| NORGESTREL-ETHINYL ESTRADIOL   | 300640  |
| LEVONORGESTREL-ETH ESTRA       | 579386  |
| LEVONORGESTREL-ETH ESTRA       | 707600  |
| LEVONORGESTREL-ETH ESTRA       | 782416  |
| LEVONORGESTREL-ETH ESTRA       | 782432  |
| LEVONORGESTREL-ETH ESTRA       | 2042320 |
| NORGESTREL-ETHINYL ESTRADIOL   | 2043033 |
| LEVONORGESTREL-ETH ESTRA       | 2043726 |
| NORGESTIMATE-ETHINYL ESTRADIOL | 2258560 |
| NORETHINDRONE-MESTRANOL        | 30333   |
| NORETHINDRONE-MESTRANOL        | 30341   |
| LEVONORGESTREL-ETH ESTRA       | 2236974 |
| ETHYNODIOL D-ETHINYL ESTRADIOL | 471526  |
| NORETHINDRONE-ETHINYL ESTRAD   | 340731  |
| NORETHINDRONE-MESTRANOL        | 340758  |
| NORETHINDRONE A-E ESTRADIOL    | 343838  |
| NORETHINDRONE A-E ESTRADIOL    | 353027  |
| NORETHINDRONE-ETHINYL ESTRAD   | 372838  |
| NORETHINDRONE-ETHINYL ESTRAD   | 373273  |
| NORETHINDRONE-ETHINYL ESTRAD   | 531014  |
| NORETHINDRONE-ETHINYL ESTRAD   | 602965  |
| NORETHINDRONE-ETHINYL ESTRAD   | 695734  |
| NORETHINDRONE-ETHINYL ESTRAD   | 2187094 |

## Supplementary material

|                                |         |
|--------------------------------|---------|
| NORETHINDRONE-ETHINYL ESTRAD   | 2187116 |
| NORETHINDRONE-ETHINYL ESTRAD   | 2189062 |
| ETHINYL ESTRADIOL/NORETH AC    | 2242531 |
| NORGESTREL-ETHINYL ESTRADIOL   | 340766  |
| NORGESTREL-ETHINYL ESTRADIOL   | 342815  |
| LEVONORGESTREL-ETH ESTRA       | 586609  |
| LEVONORGESTREL-ETH ESTRA       | 707503  |
| LEVONORGESTREL-ETH ESTRA       | 782424  |
| LEVONORGESTREL-ETH ESTRA       | 782440  |
| LEVONORGESTREL-ETH ESTRA       | 2042339 |
| NORGESTREL-ETHINYL ESTRADIOL   | 2043041 |
| LEVONORGESTREL-ETH ESTRA       | 2043734 |
| NORGESTIMATE-ETHINYL ESTRADIOL | 2258587 |
| LEVONORGESTREL-ETH ESTRA       | 2236975 |
| NORGESTIMATE-ETHINYL ESTRADIOL | 1968440 |
| NORGESTIMATE-ETHINYL ESTRADIOL | 2028700 |
| NORGESTIMATE-ETHINYL ESTRADIOL | 1992872 |
| NORGESTIMATE-ETHINYL ESTRADIOL | 2029421 |
| DESOGESTREL-ETHINYL ESTRADIOL  | 2042487 |
| DESOGESTREL-ETHINYL ESTRADIOL  | 2042541 |
| DESOGESTREL-ETHINYL ESTRADIOL  | 2042479 |
| DESOGESTREL-ETHINYL ESTRADIOL  | 2042533 |
| ESTRADIOL/NORETH AC            | 2241835 |
| ESTRADIOL/NORETH AC            | 2241837 |
| LEVONORGESTREL                 | 2241674 |
| ESTROGEN,CON/M-PROGEST ACET    | 2242878 |
| ESTROGEN,CON/M-PROGEST ACET    | 2242879 |
| ESTRADIOL/NORETH AC            | 2243529 |
| ESTRADIOL/NORETH AC            | 2243530 |
| ETHINYL ESTRADIOL/DROSPIRENONE | 2261723 |
| ETHINYL ESTRADIOL/DROSPIRENONE | 2261731 |
| ETONOGESTREL/ETHINYL ESTRADIOL | 2253186 |
| ETHINYL ESTRADIOL/NORELGEST    | 2248297 |
| DIENESTROL                     | 441295  |
| DIETHYLSTILBESTROL             | 3360    |
| DIETHYLSTILBESTROL             | 2091461 |
| DIETHYLSTILBESTROL             | 2091488 |
| ESTRADIOL                      | 464791  |
| ESTRADIOL                      | 2148587 |
| ESTRADIOL                      | 464805  |

## Supplementary material

|                      |         |
|----------------------|---------|
| ESTRADIOL            | 2148595 |
| ESTRADIOL VALERATE   | 29238   |
| ESTRADIOL            | 756849  |
| ESTRADIOL            | 2237807 |
| ESTRADIOL            | 2243722 |
| ESTRADIOL            | 2245676 |
| ESTRADIOL            | 756857  |
| ESTRADIOL            | 2204428 |
| ESTRADIOL            | 2231509 |
| ESTRADIOL            | 2237808 |
| ESTRADIOL            | 2243724 |
| ESTRADIOL            | 2244000 |
| ESTRADIOL            | 2246967 |
| ESTRADIOL            | 756792  |
| ESTRADIOL            | 2204444 |
| ESTRADIOL            | 2231510 |
| ESTRADIOL            | 2244002 |
| ESTRADIOL            | 2246969 |
| ESTRADIOL            | 2168898 |
| ESTRADIOL            | 2204436 |
| ESTRADIOL            | 2244001 |
| ESTRADIOL            | 2246968 |
| ESTRADIOL            | 2225190 |
| ESTRADIOL            | 2204401 |
| ESTRADIOL            | 2238704 |
| ESTRADIOL            | 2243999 |
| ESTRADIOL            | 2241332 |
| ESTRADIOL            | 2247499 |
| ESTRADIOL            | 2247500 |
| ESTROGENS,CONJUGATED | 2569    |
| ESTROGENS,CONJUGATED | 2043394 |
| ESTROGENS,CONJUGATED | 2230891 |
| ESTROGENS,CONJUGATED | 2239654 |
| ESTROGENS,CONJUGATED | 2577    |
| ESTROGENS,CONJUGATED | 265470  |
| ESTROGENS,CONJUGATED | 587281  |
| ESTROGENS,CONJUGATED | 2043408 |
| ESTROGENS,CONJUGATED | 2089    |
| ESTROGENS,CONJUGATED | 2043440 |
| ESTROGENS,CONJUGATED | 403466  |

## Supplementary material

|                                |          |
|--------------------------------|----------|
| ESTROGENS,CONJUGATED           | 2043416  |
| ESTROGENS,CONJUGATED           | 2230892  |
| ESTROGENS,CONJUGATED           | 2239655  |
| ESTROGENS,CONJUGATED           | 2585     |
| ESTROGENS,CONJUGATED           | 265489   |
| ESTROGENS,CONJUGATED           | 587303   |
| ESTROGENS,CONJUGATED           | 2043424  |
| ESTROGENS,CONJUGATED           | 2043432  |
| ESTROGENS,CONJUGATED           | 2043386  |
| ME-TESTOSTERONE/ESTROGEN,CON   | 53538    |
| ESTROPIPATE                    | 282685   |
| ESTROPIPATE                    | 2089769  |
| ESTROPIPATE                    | 282677   |
| ESTROPIPATE                    | 2089777  |
| ESTROPIPATE                    | 2089793  |
| ESTRADIOL/NORETH AC            | 2108186  |
| NORGESTIMATE-ETHINYL ESTRADIOL | 2229064  |
| NORGESTIMATE-ETHINYL ESTRADIOL | 2229218  |
| NORGESTIMATE-ETHINYL ESTRADIOL | 2229226  |
| ETHINYL ESTRADIOL/CYPROTERONE  | 2233542  |
| ETHINYL ESTRADIOL/NORELGEST    | 2246340  |
| NO GENERIC FORMULARY           | 66124057 |
| NO GENERIC FORMULARY           | 66124058 |
| NO GENERIC FORMULARY           | 66124060 |
| NO GENERIC FORMULARY           | 66124061 |
| NO GENERIC FORMULARY           | 66124062 |
| NO GENERIC FORMULARY           | 66124063 |
| NO GENERIC FORMULARY           | 66124064 |
| <hr/>                          |          |
| <b>Progestogens</b>            |          |
| <hr/>                          |          |
| <b>Progesterone</b>            |          |
| <hr/>                          |          |
| PROGESTERONE,MICRONIZED        | 2241013  |
| MEDROXYPROGESTERONE ACET       | 30848    |
| MEDROXYPROGESTERONE ACET       | 30856    |
| MEDROXYPROGESTERONE ACET       | 585092   |
| NO GENERIC FORMULARY           | 66123240 |
| MEDROXYPROGESTERONE ACET       | 708917   |
| MEDROXYPROGESTERONE ACET       | 2148552  |
| MEDROXYPROGESTERONE ACET       | 2221284  |
| MEDROXYPROGESTERONE ACET       | 2229838  |
| MEDROXYPROGESTERONE ACET       | 2244726  |

## Supplementary material

|                               |         |
|-------------------------------|---------|
| MEDROXYPROGESTERONE ACET      | 2246627 |
| MEDROXYPROGESTERONE ACET      | 30937   |
| MEDROXYPROGESTERONE ACET      | 2010739 |
| MEDROXYPROGESTERONE ACET      | 2148560 |
| MEDROXYPROGESTERONE ACET      | 2221292 |
| MEDROXYPROGESTERONE ACET      | 2229839 |
| MEDROXYPROGESTERONE ACET      | 2244727 |
| MEDROXYPROGESTERONE ACET      | 2246628 |
| MEDROXYPROGESTERONE ACET      | 729973  |
| MEDROXYPROGESTERONE ACET      | 2010933 |
| MEDROXYPROGESTERONE ACET      | 2148579 |
| MEDROXYPROGESTERONE ACET      | 2221306 |
| MEDROXYPROGESTERONE ACET      | 2229840 |
| MEDROXYPROGESTERONE ACET      | 2246629 |
| MEDROXYPROGESTERONE ACET      | 30945   |
| MEDROXYPROGESTERONE ACET      | 2267640 |
| NORETHINDRONE                 | 37605   |
| PROGESTERONE,MICRONIZED       | 2166704 |
| PROGESTERONE                  | 739952  |
| PROGESTERONE                  | 1977652 |
| PROGESTERONE                  | 2128470 |
| LEVONORGESTREL                | 2243005 |
| <hr/>                         |         |
| <b>Transmasculine</b>         |         |
| <hr/>                         |         |
| <b>Testosterone</b>           |         |
| <hr/>                         |         |
| TESTOSTERONE                  | 2249499 |
| TESTOSTERONE CYPIONATE        | 30783   |
| TESTOSTERONE PROPIONATE       | 1977571 |
| TESTOSTERONE CYPIONATE        | 1977601 |
| TESTOSTERONE CYPIONATE        | 2220318 |
| TESTOSTERONE CYPIONATE        | 2246063 |
| TESTOSTERONE ENANTHATE        | 29246   |
| TESTOSTERONE ENANTHATE        | 716936  |
| TESTOSTERONE ENANTHATE        | 739944  |
| TESTOSTERONE UNDECANOATE      | 782327  |
| TESTOSTERONE ENANTHATE/ESTRAD | 108278  |
| TESTOSTERONE ENANTHATE/ESTRAD | 2061031 |
| TESTOSTERONE                  | 2239653 |
| TESTOSTERONE                  | 2245346 |
| TESTOSTERONE                  | 2245345 |
| TESTOSTERONE                  | 2245972 |

## Supplementary material

**Chronic condition case definitions**

| <b>Chronic condition</b> |                             | <b>Case definition</b>                                                                                                                                                                                                                                                                                                                                                                  | <b>Codes</b>                                                                                                                                                                                                                                                                                                                                                                                                                                                                                              |
|--------------------------|-----------------------------|-----------------------------------------------------------------------------------------------------------------------------------------------------------------------------------------------------------------------------------------------------------------------------------------------------------------------------------------------------------------------------------------|-----------------------------------------------------------------------------------------------------------------------------------------------------------------------------------------------------------------------------------------------------------------------------------------------------------------------------------------------------------------------------------------------------------------------------------------------------------------------------------------------------------|
| Cardiovascular disease*  | Acute myocardial infarction | 1 or more hospitalizations with relevant ICD codes                                                                                                                                                                                                                                                                                                                                      | ICD-10:<br>I21 Acute myocardial infarction<br>I22 Subsequent myocardial infarction<br><br>ICD-9:<br>410 Acute myocardial infarction                                                                                                                                                                                                                                                                                                                                                                       |
|                          | Ischemic heart disease      | At least one of the following:<br><br>2 medical visits with Angina ICD-9 code 413 plus 1 heart disease prescription in 365 days; or 1 specialist visit with Angina ICD-9 code 413 plus 1 prescription in 365 days; or 2 medical visits with two ICD9 codes 410, 411, 412, 413, 414 in 365 days; or 1 CCI/CCP CABG,PCI/PCTA procedure code; or 1 hospitalization with relevant ICD code. | ICD-10:<br>I20 Angina pectoris<br>I21 Acute myocardial infarction I<br>I22 Subsequent myocardial infarction<br>I23 Certain current complications following acute myocardial infarction<br>I24 Other acute ischaemic heart diseases<br>I25 Chronic ischaemic heart disease<br><br>ICD-9:<br>410 Acute myocardial infarction<br>411 Other acute and subacute forms of ischaemic heart disease<br>412 Old myocardial infarction<br>413 Angina pectoris<br>414 Other forms of chronic ischaemic heart disease |
|                          | Chronic heart failure       | 1 or more hospitalizations or 2 or more medical visits in 365 days with relevant ICD codes                                                                                                                                                                                                                                                                                              | ICD-10:<br>I50 Heart failure<br><br>ICD-9:<br>428 Heart failure                                                                                                                                                                                                                                                                                                                                                                                                                                           |
|                          | Stroke- hospital            | 1 or more hospitalizations with relevant ICD codes                                                                                                                                                                                                                                                                                                                                      | ICD-10:<br>H34.1 Central retinal artery occlusion<br>I60 Subarachnoid hemorrhage<br>I61 Intracerebral haemorrhage<br>I63 Cerebral infarction (exclude<br>I63.6 Cerebral infarction due to                                                                                                                                                                                                                                                                                                                 |



## Supplementary material

|                           |                                                                                            |  |                                                                                                                                                                                                                                                                                                                                                                                                                                                                                                                                                                                                                                                                                                                                                                                                                                                                                                                                |
|---------------------------|--------------------------------------------------------------------------------------------|--|--------------------------------------------------------------------------------------------------------------------------------------------------------------------------------------------------------------------------------------------------------------------------------------------------------------------------------------------------------------------------------------------------------------------------------------------------------------------------------------------------------------------------------------------------------------------------------------------------------------------------------------------------------------------------------------------------------------------------------------------------------------------------------------------------------------------------------------------------------------------------------------------------------------------------------|
|                           |                                                                                            |  | <p>cerebral venous thrombosis, nonpyogenic)<br/> I64 Stroke, not specified as haemorrhage or infarction<br/> 362.3 Retinal vascular occlusion<br/> 430 Subarachnoid hemorrhage<br/> 431 Intracerebral hemorrhage<br/> 433.x1 Occlusion and stenosis of precerebral arteries<br/> 434.x Occlusion cerebral arteries<br/> 436 Acute but ill-defined cerebrovascular disease</p> <p><i>Excludes any traumatic brain injury</i></p> <p>ICD-10:<br/> H34.0 Transient retinal artery occlusion<br/> G45.0 Vertebro-basilar artery syndrome<br/> G45.1 Carotid artery syndrome (hemispheric)<br/> G45.2 Multiple and bilateral precerebral artery syndromes<br/> G45.3 Amaurosis fugax<br/> G45.8 Other transient cerebral ischemic attacks and related syndromes<br/> G45.9 Transient cerebral ischemic attack, unspecified</p> <p>ICD-9:<br/> 435 Transient cerebral ischemia</p> <p><i>Excludes any traumatic brain injury</i></p> |
| Transient ischemic attack | 1 or more hospitalizations with relevant ICD codes                                         |  | <p>ICD-10:<br/> N01 Rapidly progressive nephritic syndrome<br/> N03 Chronic nephritic syndrome<br/> N04 Nephrotic syndrome<br/> N05 Unspecified nephritic syndrome<br/> N06 Isolated proteinuria with specified morphological lesion<br/> N07 Hereditary nephropathy, not elsewhere classified</p>                                                                                                                                                                                                                                                                                                                                                                                                                                                                                                                                                                                                                             |
| Chronic kidney disease*   | 1 or more hospitalizations or 2 or more medical visits in 365 days with relevant ICD codes |  |                                                                                                                                                                                                                                                                                                                                                                                                                                                                                                                                                                                                                                                                                                                                                                                                                                                                                                                                |

## Supplementary material

---

|                       |                                                                                    |                                                                                                                                                                                                                                                                                                                                                                                                                                                                                                                                                                                                                                                                                                                                                                                                                                                             |
|-----------------------|------------------------------------------------------------------------------------|-------------------------------------------------------------------------------------------------------------------------------------------------------------------------------------------------------------------------------------------------------------------------------------------------------------------------------------------------------------------------------------------------------------------------------------------------------------------------------------------------------------------------------------------------------------------------------------------------------------------------------------------------------------------------------------------------------------------------------------------------------------------------------------------------------------------------------------------------------------|
|                       |                                                                                    | N18 Chronic kidney disease<br>N19 Unspecified kidney failure<br>N26 Unspecified contracted kidney<br>N27 Small kidney of unknown cause                                                                                                                                                                                                                                                                                                                                                                                                                                                                                                                                                                                                                                                                                                                      |
|                       |                                                                                    | ICD-9:<br>581 Nephrotic syndrome 582<br>Chronic glomerulonephritis<br>583 Nephritis and nephropathy, not specified as acute or chronic<br>585 Chronic renal failure 586<br>Renal failure, unspecified<br>587 Renal sclerosis, unspecified<br>589 Small kidney of unknown cause                                                                                                                                                                                                                                                                                                                                                                                                                                                                                                                                                                              |
| Chronic liver disease | 1 or more hospitalization or medical visit with relevant diagnosis within 365 days | ICD-9:<br>571.0 Alcoholic fatty liver<br>571.2 Alcoholic cirrhosis of liver<br>571.3 Alcoholic liver damage, unspecified<br>571.4 Chronic hepatitis<br>571.5 Cirrhosis of liver without mention of alcohol<br>571.6 Billiary cirrhosis<br>571.8 Other chronic nonalcoholic liver disease<br>571.9 Unspecified chronic liver disease without mention of alcohol<br>070.3 Viral hepatitis B without mention of hepatic coma<br>070.30 Viral hepatitis B without mention of hepatic coma, acute or unspecified, without mention of hepatitis delta<br>070.31 Viral hepatitis B without mention of hepatic coma, acute or unspecified, with hepatitis delta<br>070.32 Viral hepatitis B without mention of hepatic coma, chronic, without mention of hepatitis delta<br>070.33 Viral hepatitis B without mention of hepatic coma, chronic, with hepatitis delta |

---

## Supplementary material

|                                        |                                                                                                                                                                                                                                                                                                                                                                                                                                   |                                                                                                                                                                                                                                                                                                                                                                                                                                                                                                            |
|----------------------------------------|-----------------------------------------------------------------------------------------------------------------------------------------------------------------------------------------------------------------------------------------------------------------------------------------------------------------------------------------------------------------------------------------------------------------------------------|------------------------------------------------------------------------------------------------------------------------------------------------------------------------------------------------------------------------------------------------------------------------------------------------------------------------------------------------------------------------------------------------------------------------------------------------------------------------------------------------------------|
| Chronic Obstructive Pulmonary Disease* | 1 or more hospitalization or 2 or more medical visits within 365 days                                                                                                                                                                                                                                                                                                                                                             | <p>070.52 Hepatitis delta without mention of active Hepatitis B disease or hepatic coma<br/> V02.61 Hepatitis B carrier<br/> 070.42 Hepatitis delta without mention of active Hepatitis B disease with hepatic coma<br/> 070.54 Chronic hepatitis C without mention of hepatic coma<br/> V02.62 Hepatitis C carrier</p> <p>ICD-10:<br/> J41 Simple and mucopurulent chronic bronchitis<br/> J42 Unspecified chronic bronchitis<br/> J43 Emphysema<br/> J44 Other chronic obstructive pulmonary disease</p> |
| Diabetes Mellitus*                     | <p>At least 1 of the following:</p> <p>1 hospitalization or 2 medical visits in 365 days with relevant ICD codes; or 2 or more insulin prescriptions in 365 days; or 2 or more oral antihyperglycemic (not including metformin) prescriptions in 365 days; or 1 insulin and 1 oral antihyperglycemic (including metformin) in 365 days; or 2 metformin prescriptions and 1 medical visit in one year with relevant ICD codes.</p> | <p>ICD-9:<br/> 491 Chronic bronchitis<br/> 492 Emphysema<br/> 496 Chronic airways obstruction, not elsewhere classified</p> <p>ICD-10:<br/> E10 Type 1 diabetes mellitus<br/> E11 Type 2 diabetes mellitus<br/> E13 Other specified diabetes mellitus<br/> E14 Unspecified diabetes mellitus</p> <p>ICD-9:<br/> 250 Diabetes mellitus</p>                                                                                                                                                                  |

## Supplementary material

---

|                             |                                                                                                                     |                                                                                                                                                                                                                                                                                                                                                                                                                                                                                                                                                                                              |
|-----------------------------|---------------------------------------------------------------------------------------------------------------------|----------------------------------------------------------------------------------------------------------------------------------------------------------------------------------------------------------------------------------------------------------------------------------------------------------------------------------------------------------------------------------------------------------------------------------------------------------------------------------------------------------------------------------------------------------------------------------------------|
| Hypertension*               | <i>Excludes gestational diabetes.</i>                                                                               | ICD-10:<br>I10 Essential (primary) hypertension<br>I11 Hypertensive heart disease<br>I12 Hypertensive renal disease<br>I13 Hypertensive heart and renal disease<br>I15 Secondary hypertension                                                                                                                                                                                                                                                                                                                                                                                                |
|                             | 1 or more hospitalizations or 2 or more medical visits within 2 years with relevant ICD codes.                      |                                                                                                                                                                                                                                                                                                                                                                                                                                                                                                                                                                                              |
|                             | <i>Excludes gestational hypertension.</i>                                                                           | ICD-9:<br>401 Essential hypertension<br>402 Hypertensive heart disease<br>403 Hypertensive renal disease<br>404 Hypertensive heart and renal disease<br>405 Secondary hypertension                                                                                                                                                                                                                                                                                                                                                                                                           |
| Mood and anxiety disorders* | 1 or more hospitalizations with a relevant ICD code or 2 or more medical visits with a relevant code within 2 years | ICD-10:<br>F30 Manic episode<br>F31 Bipolar affective disorder<br>F32 Depressive episode<br>F33 Recurrent depressive disorder<br>F34 Persistent mood [affective] disorders<br>F38 Other mood [affective] disorders<br>F39 Unspecified mood [affective] disorder<br>F40 Phobic anxiety disorders<br>F41 Other anxiety disorders<br>F42 Obsessive-compulsive disorder<br>F43 Reaction to severe stress, and adjustment disorders<br>F44 Dissociative (conversion) disorders<br>F45 Somatoform disorders<br>F48 Other neurotic disorders<br>F68 Other disorders of adult personality & behavior |
|                             |                                                                                                                     | ICD-9:                                                                                                                                                                                                                                                                                                                                                                                                                                                                                                                                                                                       |

---

## Supplementary material

|                           |                                                                                                                                                                 |                                                                                            |                                                                                                                                                                                                                                                                                                                                                                                                                                                                                                                    |
|---------------------------|-----------------------------------------------------------------------------------------------------------------------------------------------------------------|--------------------------------------------------------------------------------------------|--------------------------------------------------------------------------------------------------------------------------------------------------------------------------------------------------------------------------------------------------------------------------------------------------------------------------------------------------------------------------------------------------------------------------------------------------------------------------------------------------------------------|
|                           |                                                                                                                                                                 |                                                                                            | 296 Affective psychoses 300 Neurotic disorders 311 Depressive disorder, not elsewhere classified                                                                                                                                                                                                                                                                                                                                                                                                                   |
| Non-AIDS defining cancer† | All prevalent cancer cases were included, with the exception of AIDS defining malignancies (Kaposi's sarcoma, non-Hodgkin's lymphoma, invasive cervical cancer) |                                                                                            | MSP DX Code:<br>50B Anxiety/Depression<br><i>Cancer case definition details available from the British Columbia Cancer Agency: <a href="http://www.bccancer.bc.ca/health-info/types-of-cancer">http://www.bccancer.bc.ca/health-info/types-of-cancer</a></i>                                                                                                                                                                                                                                                       |
| Organic mental disorders  |                                                                                                                                                                 | 1 or more medical visits or hospitalizations with relevant diagnoses within 365 days       | ICD-9:<br>290.x Dementias<br>294.x Other organic psychotic conditions<br>331.x Alzheimer's<br><br>ICD-10:<br>F00.x Dementia in Alzheimer's disease<br>F01.x Vascular Dementia<br>F02.x Dementia in other disease classified elsewhere<br>F03.x Unspecified dementia<br>F04 Amnestic disorder due to physiological condition<br>F06 Other mental disorders due to known physiological condition<br>F09 Unspecified mental disorder due to known physiological condition<br>G30 Alzheimer's disease with early onset |
| Osteoarthritis*           |                                                                                                                                                                 | 1 or more hospitalization or 2 or more medical visits in 365 days with a relevant ICD code | ICD-10:<br>M15 Polyarthrosis<br>M16 Coxarthrosis [arthrosis of hip]<br>M17 Gonarthrosis [arthrosis of knee]<br>M18 Arthrosis of first carpometacarpal joint<br>M19 Other arthrosis                                                                                                                                                                                                                                                                                                                                 |

## Supplementary material

---

|                                |                                                                                        |                                                                                                                                                                                                                                                                                                                                                                                                                                                                                 |
|--------------------------------|----------------------------------------------------------------------------------------|---------------------------------------------------------------------------------------------------------------------------------------------------------------------------------------------------------------------------------------------------------------------------------------------------------------------------------------------------------------------------------------------------------------------------------------------------------------------------------|
| Personality disorder           | 1 or more hospitalizations or medical visits with a relevant diagnosis within 365 days | ICD-9:<br>715 Osteoarthritis and allied disorders<br>ICD-9:<br>301.x Personality disorders<br>ICD-10:<br>F60.x Specified personality disorders<br>F62 Enduring personality changes, not attributable to brain damage and disease<br>F68.1 Intentional production or feigning of symptoms or disabilities, either physical or psychological<br>F68.8 Other specified disorders or adult personality and behaviour<br>F69 Unspecified disorder or adult personality and behaviour |
| Schizophrenia related disorder | 1 or more medical visit or hospitalizations with relevant diagnoses within 365 days    | ICD-9:<br>295.x Schizophrenic disorders<br>297.0 Paranoid state, simple<br>297.1 Delusional disorder<br>297.2 Paraphrenia<br>297.3 Shared psychotic disorder<br>ICD-10:<br>F20.x Paranoid schizophrenia<br>F21.x Schizotypal disorder<br>F23.2 Acute schizophrenia-like psychotic disorder<br>F25.x Schizoaffective disorders                                                                                                                                                   |

---

\* Case definition adapted from British Columbia Ministry of Health version 2017, April 4 2019 update

† Case-definition adapted from British Columbia Cancer Agency
